# Supplementary material for: Trans-ancestry epigenome-wide association meta-analysis of DNA methylation with lifetime cannabis use
Source: Mol Psychiatry. 2023 Nov 7;29(1):124–33. doi: 10.1038/s41380-023-02310-w (PMC11078760; doi:10.1038/s41380-023-02310-w)
Supplement: Supplementary file 2 — Supplementary tables [file 41380_2023_2310_MOESM2_ESM.xlsx]

## Sheet: Supplementary Table 1
Supplementary Table 1. Preprocessing of DNAm data in each cohort.
Study Cohort	DNAm array	Main R package	Background correction	detection p-value cutoff	Nbeads threshold	Sample call rate threshold	Normalization	Cell type proportion
Sister Study	450K	ENmix	Yes	1e-06	3	0.95	Quantile normalization	Houseman
GuLF	EPIC	ENmix	Yes	1e-06	3	0.95	Quantile normalization	Houseman
NTR	450K	MethylAid	Yes	0.01	3	0.95	Functional normalization	Measured
VACS	450K and EPIC	minfi	Yes	1e-12	NA	0.98	Quantile normalization	Houseman
FinnTwin	450K and EPIC	meffil	Yes	0.05	3	0.9	BMIQ	Houseman
ALSPAC	EPIC	meffil	Yes	0.01	3	0.9	Functional normalization	Houseman
TwinsUK	EPIC	minfi	Yes	1e-06	3	0.95	Quantile normalization	Houseman

## Sheet: Supplementary Table 2
Supplementary Table 2. Top CpGs associated with lifetime cannabis use from EWAS with Model 2 (adjusted for cigarette smoking).
EWAS meta-analysis results in all participants								EWAS meta-analysis results in EA					EWAS meta-analysis results in AA					EWAS meta-analysis results in male-only cohorts					EWAS meta-analysis results in female-only cohorts
MarkerName	Effect	StdErr	P.value	chr	Direction	HetPVal	pos	Effect	StdErr	P.value	Direction	HetPVal	Effect	StdErr	P.value	Direction	HetPVal	Effect	StdErr	P.value	Direction	HetPVal	Effect	StdErr	P.value	Direction	HetPVal
cg22572071	0.004	0.0008	1.09e-07	chr6	++++++++++	0.3081	47074382	0.0041	0.0008	2.994e-07	+++++++	0.1773	0.0034	0.0024	0.1544	+++	0.4639	0.0047	0.0018	0.0105	++++	0.4993	0.0023	0.0011	0.04349	++	0.3076
cg00813162	-0.0028	0.0005	2.458e-07	chr14	-+--------	0.39	69443362	-0.0026	0.0006	1.1e-05	-------	0.9214	-0.0043	0.0015	0.003582	-+-	0.04142	-0.0032	0.0012	0.005706	-+--	0.05039	-0.0022	0.001	0.02838	--	0.617
cg01101459	-0.0042	0.0008	3.895e-07	chr1	-+---+----	0.4424	234871477	-0.0047	0.0009	7.608e-08	---+---	0.5488	-0.0003	0.0023	0.8974	-+-	0.6674	-0.0027	0.0018	0.1486	-+--	0.3196	-0.0037	0.0014	0.009652	--	0.8557
cg15280358	0.0058	0.0012	5.145e-07	chr10	+-++?++++-	0.5222	127904472	0.0055	0.0013	1.389e-05	++?+++-	0.8032	0.0077	0.003	0.009059	+-+	0.1149	0.0079	0.0022	0.0003583	+-++	0.2277	0.0061	0.0019	0.001526	+-	0.3475
cg06983715	0.0005	0.0001	7.904e-07	chr1	-+++--++++	0.2558	86042674	0.0006	0.0001	8.847e-07	++--+++	0.1229	0.0003	0.0003	0.2561	-++	0.9123	0.0007	0.0002	0.0002815	-+++	0.2986	0.0006	0.0002	0.0001909	++	0.6523
cg20348000	-0.006	0.0013	3.113e-06	chr10	-+-------?	0.502	88615964	-0.0062	0.0014	4.576e-06	------?	0.846	-0.0041	0.0042	0.3237	-+-	0.07937	-0.0065	0.0036	0.06867	-+--	0.09614	-0.0082	0.0028	0.003937	-?	1
cg08175536	0.003	0.0007	3.512e-06	chr15	+-+++++++-	0.6433	89927750	0.0032	0.0007	2.032e-06	++++++-	0.4704	0.0006	0.0023	0.7809	+-+	0.8953	0.0026	0.0017	0.1217	+-++	0.6602	0.0039	0.0009	2.153e-05	+-	0.3161
cg24035484	-0.0021	0.0005	4.925e-06	chr12	----?-----	0.1041	20000505	-0.0021	0.0005	2.878e-05	--?----	0.1163	-0.0021	0.0011	0.06637	---	0.1104	-0.0029	0.0007	8.328e-05	----	0.1504	-0.0013	0.0007	0.06907	--	0.03803
cg05635274	0.0055	0.0012	5.219e-06	chr16	++++++--++	0.2213	2866901	0.0056	0.0014	5.639e-05	++++--+	0.07072	0.0052	0.0024	0.03277	+++	0.9023	0.0034	0.0021	0.1082	++-+	0.4794	0.0087	0.0023	0.0001969	++	0.3574
cg27076525	0.0007	0.0002	7.545e-06	chr4	-++-++-+--	0.2773	84252053	0.0008	0.0002	3.985e-06	+-++-+-	0.5426	-0.0002	0.0008	0.8258	-+-	0.09551	0.0002	0.0007	0.7862	-++-	0.147	0.0009	0.0002	1.361e-06	+-	0.3363
cg03676485	-0.0037	0.0008	7.982e-06	chr7	--------+-	0.7999	2563816	-0.0036	0.0009	3.004e-05	-------	0.7103	-0.004	0.0025	0.1103	--+	0.4477	-0.0053	0.002	0.006524	---+	0.5151	-0.0024	0.0015	0.09734	--	0.6438
cg17464820	-0.0042	0.0009	8.475e-06	chr11	-+---+----	0.01161	116838417	-0.0045	0.001	5.647e-06	---+---	0.02168	-0.0015	0.0028	0.6062	-+-	0.06792	-0.0051	0.0024	0.03776	-+--	0.01016	-0.0073	0.0016	4.584e-06	--	0.836
cg10414881	0.0025	0.0006	9.053e-06	chr14	+++++-++-+	0.5035	22993036	0.0027	0.0006	5.885e-06	+++-+++	0.3917	0.0009	0.0016	0.5816	++-	0.64	0.0013	0.0012	0.2913	+++-	0.7973	0.0032	0.0008	0.0001267	++	0.1408
cg04220298	0.0011	0.0002	1.129e-05	chr11	+++++-?+++	0.7117	73587932	0.001	0.0003	0.0002268	+++-?++	0.5633	0.0016	0.0006	0.01062	+++	0.7141	0.0012	0.0005	0.008574	++++	0.6893	0.0012	0.0004	0.002472	++	0.4161
cg10750182	-0.0027	0.0006	1.14e-05	chr10	-+---+---+	0.1123	73497514	-0.0023	0.0007	0.0005616	---+--+	0.7283	-0.0063	0.0018	0.0007009	-+-	0.03781	-0.0058	0.0015	0.0001248	-+--	0.08075	-0.0019	0.001	0.06858	-+	0.5473
cg26405097	-0.004	0.0009	1.335e-05	chr6	-+------+-	0.6265	15428301	-0.0044	0.001	4.925e-06	-------	0.7635	-0.0004	0.0027	0.8731	-++	0.403	-0.0032	0.0023	0.1581	-+-+	0.1325	-0.0049	0.0015	0.001185	--	0.8558
cg23957118	-0.0003	0.0001	1.511e-05	chr20	----?-----	0.6927	62200850	-0.0003	0.0001	0.0003521	--?----	0.4272	-0.0004	0.0002	0.01059	---	0.9487	-0.0003	0.0001	0.01804	----	0.6726	-0.0003	0.0001	0.003855	--	0.6205
cg17095652	-0.0032	0.0007	1.562e-05	chr15	-+-------?	0.5386	40161645	-0.0032	0.0008	5.115e-05	------?	0.4904	-0.0028	0.0018	0.1282	-+-	0.2865	-0.0035	0.0012	0.004342	-+--	0.4139	-0.002	0.0014	0.1515	-?	1
cg02725065	-0.001	0.0002	1.628e-05	chr15	-+-----+--	0.2124	101718610	-0.0011	0.0003	1.224e-05	-----+-	0.4581	-0.0004	0.0007	0.5912	-+-	0.06429	-0.0002	0.0007	0.7985	-++-	0.1136	-0.0011	0.0003	0.000175	--	0.6754
cg13619623	-0.0036	0.0008	1.674e-05	chr7	-----+----	0.9247	33637324	-0.0036	0.0009	9.46e-05	---+---	0.7854	-0.0034	0.0019	0.06962	---	0.7407	-0.0033	0.0016	0.03388	----	0.8929	-0.0043	0.0014	0.002642	--	0.806
cg14237301	-0.004	0.0009	1.76e-05	chr16	----?++---	0.1763	28506477	-0.0035	0.001	0.0003611	--?++--	0.1608	-0.0081	0.0029	0.004727	---	0.5263	-0.0075	0.0022	0.0008791	----	0.7057	-0.0036	0.0014	0.01248	--	0.4404
cg02701825	-0.0453	0.0106	1.852e-05	chr17	?????????-	1	73083632	-0.0453	0.0106	1.852e-05	??????-	1	NA	NA	NA	NA	NA	NA	NA	NA	NA	NA	-0.0453	0.0106	1.852e-05	?-	1
cg11660018	-0.0043	0.001	2.064e-05	chr11	-+--------	0.001933	86510915	-0.0035	0.0011	0.0009504	-------	0.1262	-0.0097	0.0029	0.0008456	-+-	0.002184	-0.0114	0.0024	2.548e-06	-+--	0.003909	-0.004	0.0022	0.06932	--	0.8836
cg18864804	0.0029	0.0007	2.068e-05	chr10	++++?+-+++	0.1745	117642441	0.0027	0.0007	0.0001536	++?+-++	0.07947	0.0039	0.0019	0.04252	+++	0.5121	0.0035	0.0015	0.02122	++++	0.6922	0.0018	0.001	0.05814	++	0.8607
cg10328583	-0.0026	0.0006	2.251e-05	chr1	----+-----	0.04413	6551073	-0.0024	0.0007	0.0002698	--+----	0.01615	-0.0047	0.0019	0.01417	---	0.8195	-0.0041	0.0014	0.004017	----	0.8984	-0.0042	0.001	1.368e-05	--	0.8895
cg15140465	-0.0038	0.0009	2.303e-05	chr11	--------+-	0.8077	77184194	-0.0041	0.001	2.202e-05	-------	0.8999	-0.0019	0.0023	0.4162	--+	0.3095	-0.0024	0.0019	0.2017	---+	0.4724	-0.0055	0.0017	0.00139	--	0.626
cg24338491	-0.001	0.0002	2.306e-05	chr12	?+--+----+	0.4898	91775501	-0.001	0.0002	3.96e-05	--+---+	0.3161	-0.0012	0.0012	0.3052	?+-	0.5453	-0.002	0.0008	0.01028	?+--	0.5914	-0.0009	0.0003	0.001587	-+	0.3896
cg10655021	-0.0016	0.0004	2.331e-05	chr19	----+-+--+	0.1456	21769430	-0.0015	0.0004	4.904e-05	--+-+-+	0.108	-0.0026	0.002	0.1953	---	0.2583	-0.002	0.0013	0.1286	----	0.4151	-0.0017	0.0004	0.0001662	-+	0.7929
cg04099094	0.001	0.0002	2.372e-05	chr7	+++++-++++	0.7352	66093274	0.001	0.0003	0.0001115	+++-+++	0.4389	0.0009	0.0005	0.08606	+++	0.9172	0.0009	0.0004	0.0182	++++	0.98	0.0007	0.0004	0.09415	++	0.2886
cg20883194	-0.0021	0.0005	2.448e-05	chr12	----+-+-+-	0.3996	45801769	-0.002	0.0005	0.0001685	--+-+--	0.3221	-0.0024	0.0013	0.05333	--+	0.309	-0.0021	0.0011	0.05164	---+	0.4497	-0.0026	0.0007	0.0002659	--	0.07221
cg01035812	0.0002	0.0001	2.449e-05	chr17	+++-+-++++	0.4834	4843585	0.0002	0.0001	0.0001512	+-+-+++	0.4503	0.0003	0.0002	0.0512	+++	0.3018	0.0003	0.0001	0.01979	++++	0.494	0.0003	0.0001	0.0002141	++	0.5192
cg03605542	-0.0031	0.0007	2.558e-05	chr5	-----+----	0.536	59929339	-0.003	0.0008	8.103e-05	---+---	0.262	-0.0037	0.0025	0.1326	---	0.8954	-0.006	0.0018	0.001161	----	0.5567	-0.0038	0.0012	0.001817	--	0.7061
cg26035837	0.0008	0.0002	2.633e-05	chr20	+-+++--+++	0.04566	56885003	0.0009	0.0002	1.956e-05	+++--++	0.01495	0.0003	0.0005	0.5187	+-+	0.8048	0.0011	0.0004	0.005357	+-++	0.1753	0.0006	0.0003	0.06254	++	0.0383
cg14624207	-0.0039	0.0009	2.652e-05	chr11	---?------	0.1503	68142198	-0.0031	0.001	0.001526	-?-----	0.4927	-0.0087	0.0025	0.0006136	---	0.1748	-0.0085	0.002	2.619e-05	----	0.3209	-0.0016	0.0014	0.2614	--	0.4866
cg23177095	0.0061	0.0015	3.053e-05	chr17	+-+++++++-	0.5183	30873196	0.0057	0.0016	0.0002563	++++++-	0.9871	0.0094	0.0044	0.03068	+-+	0.03787	0.0076	0.0038	0.04403	+-++	0.06443	0.006	0.0031	0.05465	+-	0.7423
cg25170591	-0.0013	0.0003	3.09e-05	chr10	----+----+	0.6129	103881062	-0.0011	0.0003	0.0007367	--+---+	0.4655	-0.0018	0.0007	0.009384	---	0.6644	-0.0017	0.0005	0.0007581	----	0.8278	-0.0008	0.0005	0.1428	-+	0.4619
cg21026460	0.0025	0.0006	3.103e-05	chr3	++++++++++	0.5113	13539059	0.0023	0.0006	0.0002423	+++++++	0.3803	0.0041	0.0019	0.02947	+++	0.6139	0.0048	0.0013	0.0002108	++++	0.7562	0.0014	0.0008	0.09527	++	0.4351
cg24366564	-0.0048	0.0011	3.175e-05	chr17	-??--????+	0.6932	2843149	-0.0045	0.0012	0.0001631	?--???+	0.6739	-0.008	0.0041	0.05252	-??	1	-0.008	0.0041	0.05252	-???	1	0.0039	0.0117	0.7408	?+	1
cg02364642	-0.003	0.0007	3.554e-05	chr12	---------+	0.5604	58005758	-0.0034	0.0008	2.184e-05	------+	0.3893	-0.0011	0.0018	0.5473	---	0.9309	-0.0019	0.0015	0.2173	----	0.8817	-0.0051	0.0014	0.0004055	-+	0.5049
cg07068045	-0.0065	0.0016	3.667e-05	chr11	?+-??-?-++	0.2505	69312202	-0.0076	0.0017	5.725e-06	-??-?-+	0.412	0.0015	0.0045	0.7347	?++	0.7611	-0.0004	0.0036	0.9132	?+-+	0.744	-0.0089	0.0019	2.184e-06	-+	0.5065
cg06783533	-0.0015	0.0004	3.718e-05	chr16	-----+----	0.3933	56388908	-0.0015	0.0004	9.887e-05	---+---	0.3049	-0.0012	0.0009	0.1628	---	0.3297	-0.0011	0.0007	0.08984	----	0.5242	-0.0013	0.0005	0.009156	--	0.7125
cg01242348	-0.0024	0.0006	3.74e-05	chr14	-+---++---	0.1117	23586886	-0.0022	0.0006	0.0003461	---++--	0.09751	-0.0037	0.0017	0.02654	-+-	0.2383	-0.0051	0.0013	0.0001286	-+--	0.1936	-0.0028	0.0011	0.01069	--	0.9426
cg00831672	-0.0002	0.0001	3.813e-05	chr7	----?----+	0.8298	16437298	-0.0002	0.0001	0.0001618	--?---+	0.6592	-0.0002	0.0001	0.09086	---	0.6371	-0.0002	0.0001	0.03511	----	0.825	-0.0002	0.0001	0.003685	-+	0.1138
cg01232511	0.01	0.0024	3.839e-05	chr16	+++++-+-++	0.46	2867446	0.01	0.0027	0.0001991	+++-+-+	0.2512	0.01	0.0057	0.07781	+++	0.6275	0.0055	0.0049	0.2571	++-+	0.3426	0.0159	0.0052	0.001978	++	0.879
cg17029151	-0.0011	0.0003	3.852e-05	chr8	----------	0.08556	82644517	-0.001	0.0003	0.0002606	-------	0.9013	-0.002	0.0009	0.03155	---	0.002485	-0.0019	0.0006	0.001977	----	0.007316	-0.0007	0.0004	0.05077	--	0.9271
cg15821562	-0.0034	0.0008	4.046e-05	chr14	-+---+----	0.5072	90083275	-0.0036	0.0009	4.907e-05	---+---	0.7348	-0.002	0.0021	0.342	-+-	0.1247	-0.0029	0.0016	0.06461	-+--	0.2023	-0.0042	0.0015	0.006477	--	0.1559
cg25827022	0.0012	0.0003	4.129e-05	chr17	++++++++++	0.1043	7287652	0.0012	0.0003	0.0002892	+++++++	0.2171	0.0011	0.0006	0.05449	+++	0.04462	0.0007	0.0004	0.1046	++++	0.05941	0.0024	0.0005	1.34e-05	++	0.8472
cg19362478	-0.0029	0.0007	4.171e-05	chr1	-----+---+	0.8909	42420460	-0.0031	0.0008	4.6e-05	---+--+	0.7536	-0.0016	0.0021	0.4371	---	0.7983	-0.0014	0.0017	0.3808	----	0.9256	-0.0031	0.0012	0.01172	-+	0.6608
cg09504131	-0.0031	0.0008	4.33e-05	chr13	++--------	0.6193	99174875	-0.0037	0.0008	8.016e-06	-------	0.9195	0.0003	0.002	0.8816	++-	0.3802	-0.0008	0.0017	0.6299	++--	0.3821	-0.0026	0.0015	0.07418	--	0.5724
cg15872922	-0.0022	0.0005	4.375e-05	chr10	?---?-?---	0.6519	102759759	-0.0021	0.0006	0.0004156	--?-?--	0.4142	-0.0027	0.0013	0.03586	?--	0.7778	-0.0019	0.0009	0.02904	?---	0.6658	-0.0026	0.0009	0.003386	--	0.7872
cg00564051	-0.0011	0.0003	4.424e-05	chr11	++--------	0.782	91957448	-0.0011	0.0003	0.0001147	-------	0.6792	-0.0009	0.0006	0.1601	++-	0.4923	-0.0005	0.0004	0.2306	++--	0.5632	-0.0014	0.0005	0.002189	--	0.8608
cg05959346	-0.0006	0.0001	4.483e-05	chr1	-+---+----	0.6386	40102679	-0.0006	0.0001	3.021e-05	---+---	0.6578	0.0004	0.001	0.6896	-+-	0.3795	0.0002	0.001	0.8774	-+--	0.2813	-0.0005	0.0002	0.0003439	--	0.1806
cg06663317	-0.0039	0.001	4.494e-05	chr16	-+-?------	0.1188	56641101	-0.0032	0.001	0.001746	-?-----	0.7271	-0.0077	0.0025	0.001955	-+-	0.02677	-0.006	0.002	0.002932	-+--	0.03532	-0.0035	0.0014	0.01065	--	0.8724
cg16415604	0.0003	0.0001	4.52e-05	chr1	+-++---++-	0.01263	155214575	0.0003	0.0001	0.0001492	++---+-	0.01197	0.0004	0.0003	0.1222	+-+	0.1044	0.0004	0.0002	0.05021	+-++	0.2092	0.0003	0.0001	0.000364	+-	0.07555
cg02100381	0.0046	0.0011	4.523e-05	chr13	++++++++--	0.3115	111025711	0.0051	0.0012	1.876e-05	++++++-	0.4341	0.0004	0.0034	0.9106	++-	0.2332	0.0006	0.0032	0.8412	+++-	0.399	0.006	0.0021	0.003278	+-	0.1577
cg17589449	-0.0009	0.0002	4.837e-05	chr22	----++---+	0.5324	31588863	-0.0007	0.0002	0.002664	--++--+	0.575	-0.0015	0.0005	0.002063	---	0.5348	-0.0012	0.0003	0.0003655	----	0.6269	-0.0009	0.0003	0.004868	-+	0.4708
cg03665853	0.001	0.0002	4.966e-05	chr1	?-+-?+???+	0.451	85219864	0.001	0.0002	2.655e-05	+-?+??+	0.4977	-0.0004	0.0012	0.7369	?-?	1	-0.0004	0.0012	0.7369	?-??	1	0.0011	0.0003	1.478e-05	++	0.8585
cg24149151	0.0004	0.0001	5.16e-05	chr10	+++++-++++	0.2291	31607717	0.0004	0.0001	0.0003486	+++-+++	0.07758	0.0005	0.0003	0.05597	+++	0.8595	0.0006	0.0002	0.01117	++++	0.9304	0.0004	0.0002	0.005438	++	0.08735
cg16700555	-0.0015	0.0004	5.231e-05	chr19	--------++	0.4072	29700860	-0.0017	0.0004	2.193e-05	------+	0.3335	-0.0004	0.0008	0.5904	--+	0.7689	-0.0014	0.0006	0.02692	---+	0.2612	-0.002	0.0006	0.0003743	-+	0.5741
cg22730830	0.0086	0.0021	5.276e-05	chr16	+++++++-++	0.4491	2867434	0.0081	0.0023	0.0004371	+++++-+	0.2575	0.0121	0.0058	0.03609	+++	0.6993	0.006	0.0048	0.2137	++-+	0.213	0.0139	0.0048	0.003834	++	0.8033
cg22596016	-0.0033	0.0008	5.365e-05	chr17	-+---?---+	0.3043	61711557	-0.0028	0.0009	0.001802	---?--+	0.5968	-0.0061	0.0021	0.003002	-+-	0.1686	-0.0054	0.0015	0.0002162	-+--	0.2844	-0.0016	0.0013	0.2133	-+	0.5136
cg09835867	0.0009	0.0002	5.541e-05	chr20	--++++++++	0.674	31173147	0.0009	0.0002	6.738e-05	+++++++	0.5022	0.0005	0.0005	0.3503	--+	0.6658	0.0009	0.0004	0.02209	--++	0.5146	0.0009	0.0003	0.003999	++	0.07334
cg00175838	-0.0023	0.0006	5.569e-05	chr6	+---------	0.3609	31695027	-0.0022	0.0006	0.0005041	-------	0.4655	-0.0033	0.0015	0.03205	+--	0.1505	-0.0031	0.0013	0.01261	+---	0.2826	-0.0038	0.0011	0.000821	--	0.9834
cg19730801	0.0005	0.0001	5.701e-05	chr14	+++++-++++	0.6147	103244459	0.0005	0.0001	0.0001387	+++-+++	0.5088	0.0005	0.0004	0.195	+++	0.3794	0.0008	0.0003	0.004763	++++	0.3915	0.0005	0.0002	0.006767	++	0.2845
cg08587845	-0.0016	0.0004	5.75e-05	chr5	----+-+--+	0.01757	134870506	-0.0017	0.0004	0.0001074	--+-+-+	0.007129	-0.0011	0.0009	0.2146	---	0.3618	-0.001	0.0006	0.09019	----	0.5632	-0.0021	0.0007	0.001991	-+	0.001941
cg13772414	-0.0036	0.0009	5.888e-05	chr2	------+---	0.9401	222383060	-0.0034	0.001	0.0003732	----+--	0.8667	-0.0049	0.0025	0.05246	---	0.6977	-0.0044	0.0022	0.04471	----	0.8355	-0.0045	0.0018	0.01109	--	0.3506
cg20231694	-0.0055	0.0014	5.941e-05	chr11	+-----+---	0.6221	70691944	-0.0061	0.0014	2.381e-05	----+--	0.6253	-0.0005	0.004	0.899	+--	0.6029	-0.0019	0.0034	0.5651	+---	0.691	-0.0065	0.0034	0.05642	--	0.2005
cg06368093	-0.0029	0.0007	5.957e-05	chr19	----?----+	0.7594	58513526	-0.0025	0.0008	0.002599	--?---+	0.8884	-0.0043	0.0015	0.004357	---	0.3333	-0.0031	0.0011	0.005918	----	0.3043	-0.0025	0.0015	0.09978	-+	0.7031
cg06520081	0.0016	0.0004	6.021e-05	chr5	+-++++-++-	0.4504	134990562	0.0015	0.0004	0.0004003	++++-+-	0.6026	0.0025	0.0012	0.04303	+-+	0.1511	0.0028	0.0009	0.001239	+-++	0.2739	0.0011	0.0006	0.07797	+-	0.7555
cg00542975	-0.0033	0.0008	6.302e-05	chr2	----------	0.4575	122392291	-0.0029	0.0008	0.000589	-------	0.8314	-0.0073	0.0029	0.01205	---	0.145	-0.0057	0.0023	0.01245	----	0.1971	-0.0023	0.0016	0.155	--	0.4569
cg18526861	0.0008	0.0002	6.399e-05	chr17	+++++-++++	0.449	73257861	0.0007	0.0002	0.001491	+++-+++	0.4207	0.0013	0.0005	0.006196	+++	0.5353	0.0011	0.0003	0.002054	++++	0.6148	0.0005	0.0003	0.1752	++	0.5808
cg12866859	-0.002	0.0005	6.681e-05	chr17	-+---+----	0.8538	43224332	-0.0019	0.0005	0.0004059	---+---	0.7978	-0.0027	0.0014	0.05396	-+-	0.5057	-0.0027	0.0011	0.01285	-+--	0.714	-0.0021	0.0007	0.003172	--	0.6078
cg09386420	-0.0026	0.0007	6.975e-05	chr16	----------	0.691	85204599	-0.0027	0.0007	0.0001126	-------	0.4504	-0.0019	0.0018	0.2944	---	0.7689	-0.0028	0.0014	0.04127	----	0.7478	-0.001	0.0012	0.4263	--	0.565
cg08504468	0.001	0.0003	6.991e-05	chr1	-++++-++++	0.2394	22468982	0.0012	0.0003	3.949e-05	+++-+++	0.1684	0.0003	0.0006	0.5791	-++	0.5842	0.0005	0.0005	0.294	-+++	0.7607	0.0016	0.0004	0.0003412	++	0.0745
cg05617886	0.0021	0.0005	7.134e-05	chr1	++++-+++++	0.4897	151739012	0.002	0.0006	0.0004783	++-++++	0.2266	0.0025	0.0013	0.05453	+++	0.9189	0.0021	0.0009	0.02201	++++	0.9534	0.0018	0.0008	0.03439	++	0.7419
cg25356736	-0.003	0.0008	7.453e-05	chr11	-+---+----	0.8937	2775022	-0.0031	0.0008	0.0001434	---+---	0.9065	-0.0023	0.002	0.244	-+-	0.3686	-0.0028	0.0017	0.09973	-+--	0.5291	-0.0038	0.0013	0.004118	--	0.7771
cg26804423	-0.0027	0.0007	7.498e-05	chr7	-----++---	0.4655	8201134	-0.0028	0.0007	0.0001504	---++--	0.2309	-0.0024	0.0021	0.2468	---	0.751	-0.0031	0.0017	0.06226	----	0.8243	-0.0029	0.0012	0.01072	--	0.9317
cg06728497	-0.0011	0.0003	7.501e-05	chr17	-+--------	0.5051	7284351	-0.0012	0.0003	4.587e-05	-------	0.341	-0.0001	0.0011	0.9256	-+-	0.7543	-0.0008	0.0007	0.2518	-+--	0.7141	-0.0011	0.0004	0.00372	--	0.9586
cg13385220	-0.0045	0.0011	7.515e-05	chr1	+-----+--+	0.01996	202250453	-0.004	0.0012	0.001013	----+-+	0.1482	-0.0081	0.0032	0.01205	+--	0.01246	-0.0097	0.0026	0.0002268	+---	0.02215	-0.0059	0.0023	0.01164	-+	0.538
cg18859248	-0.0032	0.0008	7.575e-05	chr20	-----+----	0.9673	60791502	-0.0033	0.0009	0.0002279	---+---	0.8369	-0.0029	0.002	0.1468	---	0.9417	-0.0026	0.0017	0.1233	----	0.9788	-0.0045	0.0016	0.004907	--	0.9199
cg14665716	-0.0003	0.0001	7.632e-05	chr19	---+-----+	0.7371	12146509	-0.0003	0.0001	0.0001029	-+----+	0.4531	-0.0002	0.0002	0.3918	---	0.9414	-0.0004	0.0002	0.02054	----	0.5304	-0.0003	0.0001	0.001602	-+	0.2866
cg05274650	-0.0007	0.0002	7.651e-05	chr11	---++--+--	0.02518	17928213	-0.0006	0.0002	0.002133	-++--+-	0.009589	-0.0011	0.0004	0.005006	---	0.8114	-0.0004	0.0003	0.1969	--+-	0.04602	-0.0009	0.0002	0.0001656	--	0.3416
cg17904105	0.0012	0.0003	7.785e-05	chr22	+-+-+-+++-	0.6321	30275995	0.0012	0.0003	0.0001147	+-+-++-	0.421	0.0012	0.0014	0.3919	+-+	0.5983	0.0015	0.001	0.1433	+-++	0.7766	0.0012	0.0004	0.002068	+-	0.6587
cg22257056	-0.0021	0.0005	7.792e-05	chr3	-+--------	0.2523	32462766	-0.002	0.0006	0.000298	-------	0.1402	-0.0024	0.0015	0.1078	-+-	0.4397	-0.0031	0.0012	0.01086	-+--	0.5256	-0.0021	0.0008	0.01335	--	0.00662
cg15078329	-0.0041	0.001	7.989e-05	chr1	---------+	0.3866	222628324	-0.0031	0.0011	0.005486	------+	0.6353	-0.0092	0.0026	0.0004182	---	0.7184	-0.0076	0.0023	0.0009615	----	0.5063	-0.0072	0.0026	0.005242	-+	0.5625
cg00787661	0.001	0.0003	8.055e-05	chr2	++++?-++++	0.2701	232329533	0.001	0.0003	0.0005744	++?-+++	0.1288	0.0012	0.0006	0.05199	+++	0.5225	0.0012	0.0005	0.009297	++++	0.7289	0.0012	0.0004	0.002986	++	0.2522
cg26654770	0.0228	0.0058	8.301e-05	chr12	+-++++++++	0.1432	740100	0.022	0.0063	0.0005008	+++++++	0.2404	0.0267	0.0143	0.06276	+-+	0.06732	0.0243	0.0126	0.05387	+-++	0.1376	0.012	0.0127	0.3459	++	0.2322
cg02802391	-0.0043	0.0011	8.431e-05	chr12	++--------	0.8921	66357083	-0.0046	0.0012	7.015e-05	-------	0.8436	-0.0017	0.0037	0.6428	++-	0.6063	-0.0031	0.0029	0.2764	++--	0.7052	-0.0073	0.0022	0.001071	--	0.8525
cg04811762	0.0005	0.0001	8.599e-05	chr6	+++--+++++	0.143	150039439	0.0005	0.0001	0.001128	+--++++	0.2838	0.0014	0.0005	0.004653	+++	0.2411	0.0008	0.0004	0.03052	++++	0.1033	0.0007	0.0002	9.395e-05	++	0.1716
cg08012219	-0.0081	0.0021	8.7e-05	chr17	+----+--+-	0.2325	76913036	-0.0096	0.0022	1.389e-05	---+---	0.393	0.0021	0.0057	0.7155	+-+	0.411	-0.0008	0.005	0.8696	+--+	0.4145	-0.0112	0.0043	0.009323	--	0.7356
cg06311879	0.0019	0.0005	8.961e-05	chr12	-+++++++++	0.8417	93427724	0.0018	0.0005	0.0003256	+++++++	0.6707	0.0022	0.0014	0.1155	-++	0.6638	0.002	0.001	0.04537	-+++	0.8361	0.0021	0.0007	0.002359	++	0.5736
cg27534671	-0.0012	0.0003	9.021e-05	chr13	-+--+-----	0.4326	52979688	-0.0014	0.0003	4.948e-05	--+----	0.3713	-0.0004	0.0007	0.6033	-+-	0.5594	-0.0009	0.0005	0.05658	-+--	0.5336	-0.0014	0.0005	0.003252	--	0.2048
cg12538248	-0.0003	0.0001	9.06e-05	chr8	------+---	0.9457	61194072	-0.0002	0.0001	0.0008996	----+--	0.8874	-0.0004	0.0002	0.0248	---	0.8405	-0.0003	0.0001	0.006382	----	0.8849	-0.0002	0.0001	0.00806	--	0.3114
cg16675525	-0.0029	0.0007	9.157e-05	chr10	++--------	0.007836	112158529	-0.0034	0.0008	2.796e-05	-------	0.07845	-0.0004	0.0018	0.8041	++-	0.01291	-0.0018	0.0015	0.2275	++--	0.01159	-0.0062	0.0015	4.227e-05	--	0.07284
cg07197785	-0.0026	0.0007	9.435e-05	chr1	+---?+---+	0.1358	111813690	-0.0024	0.0007	0.001069	--?+--+	0.1297	-0.0045	0.0019	0.01729	+--	0.2571	-0.0032	0.0013	0.01161	+---	0.3104	-0.0028	0.0011	0.009425	-+	0.1666
cg05207048	-0.0025	0.0006	9.672e-05	chr5	-----++---	0.7132	167513456	-0.0021	0.0007	0.002077	---++--	0.9722	-0.005	0.0018	0.004786	---	0.2547	-0.0043	0.0013	0.000843	----	0.3847	-0.0021	0.0009	0.01905	--	0.8706
cg08706907	-0.0027	0.0007	9.695e-05	chr11	-+------+-	0.6221	46696158	-0.0029	0.0007	4.834e-05	-------	0.466	0.0008	0.0031	0.8027	-++	0.9346	-0.0031	0.002	0.1222	-+-+	0.3998	-0.0026	0.0013	0.05317	--	0.5255
cg04232681	0.0022	0.0006	0.0001039	chr9	--++-++++-	0.3933	11618265	0.0022	0.0006	0.0001301	++-+++-	0.2901	0.0017	0.0025	0.4979	--+	0.3483	0.0019	0.0018	0.3045	--++	0.5489	0.0024	0.0007	0.0003694	+-	0.1186
cg25018755	0.0009	0.0002	0.0001039	chr22	+++++-++++	0.2954	43506952	0.0008	0.0002	0.001822	+++-+++	0.3276	0.0015	0.0006	0.008808	+++	0.3208	0.0014	0.0004	0.00145	++++	0.5019	0.0005	0.0003	0.1025	++	0.9741
cg18954700	-0.0003	0.0001	0.0001051	chr10	+---+++??-	0.07277	124220854	-0.0003	0.0001	0.0001006	--+++?-	0.02448	0	0.0009	0.9595	+-?	0.9591	0	0.0009	0.9595	+-??	0.9591	-0.0004	0.0001	8.766e-06	--	0.965
cg06500161	-0.0036	0.0009	0.0001084	chr21	?---?-?---	0.4167	43656587	-0.0039	0.001	6.65e-05	--?-?--	0.2831	-0.0009	0.0028	0.7597	?--	0.9784	-0.0033	0.0021	0.1127	?---	0.4366	-0.0062	0.0016	0.0001254	--	0.9152
cg18992688	-0.0017	0.0004	0.0001111	chr1	------+---	0.9366	206223241	-0.0016	0.0005	0.0004717	----+--	0.8288	-0.0027	0.0015	0.07369	---	0.878	-0.0018	0.0008	0.02002	----	0.8521	-0.0016	0.0007	0.01943	--	0.9651
cg08183916	0.001	0.0003	0.0001112	chr2	+++-+-++++	0.09536	96874535	0.0008	0.0003	0.007382	+-+-+++	0.07092	0.0018	0.0006	0.001407	+++	0.6768	0.0011	0.0004	0.003412	++++	0.349	0.0016	0.0005	0.001377	++	0.04908
cg27460040	-0.0023	0.0006	0.0001121	chr8	-+---+---+	0.003623	38648995	-0.0019	0.0007	0.004738	---+--+	0.1227	-0.0041	0.0014	0.002473	-+-	0.00224	-0.0049	0.0011	4.572e-06	-+--	0.004788	-0.0008	0.001	0.4344	-+	0.7687
cg09278098	-0.003	0.0008	0.0001131	chr12	-+---+---+	0.4452	84902512	-0.0033	0.0009	0.0001009	---+--+	0.6949	-0.0015	0.0017	0.4023	-+-	0.1267	-0.0026	0.0013	0.05183	-+--	0.1678	-0.0041	0.0012	0.000738	-+	0.2887
cg17685004	0.0027	0.0007	0.0001145	chr2	+-++++++++	0.1767	217419293	0.0028	0.0007	0.0001443	+++++++	0.143	0.0018	0.0024	0.4416	+-+	0.2285	0.0025	0.0019	0.1756	+-++	0.3629	0.0012	0.001	0.2016	++	0.7374
cg18247177	0.0007	0.0002	0.0001151	chr17	-++++-++++	0.08678	7745472	0.0007	0.0002	0.0007257	+++-+++	0.09981	0.0011	0.0005	0.04661	-++	0.1357	0.0011	0.0004	0.006172	-+++	0.2572	0.0008	0.0003	0.001838	++	0.1018
cg04655481	-0.0028	0.0007	0.0001152	chr9	---------+	0.9029	125796809	-0.0026	0.0008	0.000784	------+	0.9868	-0.0039	0.002	0.04623	---	0.2495	-0.0031	0.0016	0.04518	----	0.3589	-0.0025	0.0012	0.03417	-+	0.6638
cg16730765	-0.0003	0.0001	0.0001157	chr15	-------+-+	0.7483	79586428	-0.0002	0.0001	0.0007936	-----++	0.6631	-0.0005	0.0002	0.02642	---	0.7819	-0.0003	0.0002	0.1195	--+-	0.3918	-0.0003	0.0001	0.0009256	-+	0.3877
cg12055421	0.0002	0.0001	0.0001162	chr2	+++-+-++++	0.1892	74685521	0.0002	0.0001	0.01026	+-+-+++	0.1458	0.0004	0.0001	0.0008298	+++	0.9964	0.0003	0.0001	0.003686	++++	0.3281	0.0001	0.0001	0.1883	++	0.6334
cg17024593	-0.0054	0.0014	0.0001185	chr12	+----+?--+	0.42	34490115	-0.0055	0.0015	0.0002492	---+?-+	0.1841	-0.0052	0.0044	0.2365	+--	0.7392	-0.0047	0.0036	0.1972	+---	0.8867	-0.0102	0.0026	7.544e-05	-+	0.4347
cg15321288	-0.003	0.0008	0.0001207	chr8	?---?-?--+	0.9554	38326400	-0.0029	0.0008	0.0003329	--?-?-+	0.9686	-0.0045	0.0031	0.1434	?--	0.3781	-0.0031	0.0023	0.1677	?---	0.5477	-0.0033	0.0012	0.006033	-+	0.6392
cg01970407	0.0027	0.0007	0.0001212	chr5	++++---+++	0.04783	323320	0.0022	0.0008	0.005461	++---++	0.02284	0.0045	0.0015	0.003032	+++	0.7271	0.0045	0.0012	0.0002832	++++	0.8872	0.002	0.0013	0.1226	++	0.1021
cg02931753	0.0014	0.0004	0.0001226	chr4	+++++-+++-	0.3988	154074737	0.0011	0.0004	0.006704	+++-++-	0.3257	0.0025	0.0008	0.001769	+++	0.948	0.0024	0.0006	0.0001375	++++	0.9757	0.0009	0.0008	0.253	+-	0.1969
cg06585907	-0.0003	0.0001	0.0001236	chr16	-+--++-+++	0.07465	11001839	-0.0004	0.0001	9.454e-05	--++-++	0.03414	-0.0001	0.0002	0.5567	-++	0.5566	0	0.0002	0.8326	-+++	0.5871	-0.0004	0.0001	0.0001048	-+	0.7503
cg22111078	-0.0002	0	0.0001242	chr5	+---+--??-	0.05009	172655925	-0.0002	0	9.808e-05	--+--?-	0.02607	0.0002	0.0005	0.6162	+-?	0.4244	0.0002	0.0005	0.6162	+-??	0.4244	-0.0001	0	0.0007926	--	0.9237
cg12928619	0.0001	0	0.000127	chr2	+++-+++++-	0.6927	74648754	0.0001	0	0.002009	+-++++-	0.9183	0.0003	0.0001	0.00783	+++	0.2833	0.0002	0.0001	0.001445	++++	0.3762	0.0001	0	0.01685	+-	0.5589
cg03591606	0.003	0.0008	0.0001272	chr8	++?++++???	0.519	1649522	0.0026	0.0008	0.001341	?++++??	0.8462	0.0067	0.0026	0.009896	++?	0.285	0.0067	0.0026	0.009896	++??	0.285	NA	NA	NA	NA	NA
cg03433241	-0.0028	0.0007	0.0001278	chr1	-+--------	0.9296	166853278	-0.0029	0.0008	0.0002277	-------	0.8774	-0.0022	0.002	0.2724	-+-	0.5566	-0.0021	0.0016	0.1899	-+--	0.7585	-0.0025	0.0013	0.05861	--	0.4822
cg25889918	-0.0035	0.0009	0.0001284	chr2	---?-+----	0.6723	179916184	-0.0035	0.001	0.0006208	-?-+---	0.36	-0.0036	0.0021	0.08574	---	0.8634	-0.0045	0.0017	0.006489	----	0.833	-0.0031	0.0013	0.01835	--	0.3381
cg13890706	-0.0014	0.0004	0.0001294	chr10	----?----+	0.8654	118033115	-0.0015	0.0004	0.0002095	--?---+	0.877	-0.001	0.001	0.2959	---	0.3813	-0.0012	0.0007	0.06369	----	0.5666	-0.0015	0.0005	0.005058	-+	0.7494
cg06422947	-0.0024	0.0006	0.0001296	chr17	---------+	0.9949	41167707	-0.0024	0.0007	0.0004801	------+	0.9735	-0.0025	0.0016	0.1163	---	0.7917	-0.0028	0.0013	0.02764	----	0.9098	-0.0021	0.001	0.03064	-+	0.7704
cg14487944	0.0028	0.0007	0.0001306	chr11	+-++++++++	0.8033	46261352	0.003	0.0008	9.066e-05	+++++++	0.7334	0.001	0.002	0.6264	+-+	0.6574	0.0021	0.0016	0.1812	+-++	0.6052	0.0016	0.0012	0.1891	++	0.9242
cg12025181	0.0011	0.0003	0.0001336	chr14	-+++?++-++	0.8686	61679927	0.001	0.0003	0.0002275	++?++-+	0.8229	0.0017	0.0016	0.2802	-++	0.4678	0.0013	0.0015	0.4009	-+-+	0.4404	0.0011	0.0003	0.0001912	++	0.7851
cg02657160	-0.0013	0.0003	0.0001371	chr3	-+----+---	0.7191	98311063	-0.0012	0.0004	0.0006145	----+--	0.5761	-0.0017	0.001	0.08375	-+-	0.5288	-0.0009	0.0007	0.1897	-+--	0.4626	-0.0018	0.0005	0.0001486	--	0.6808
cg04306063	-0.002	0.0005	0.0001371	chr5	----+---+-	0.3054	76249502	-0.0023	0.0006	4.73e-05	--+----	0.3203	0	0.0015	0.9914	--+	0.4572	-0.0012	0.0011	0.2752	---+	0.444	-0.0039	0.0009	1.254e-05	--	0.8237
cg23910787	0.0008	0.0002	0.0001371	chr5	+++++-++++	0.6648	179234439	0.0008	0.0002	0.0003752	+++-+++	0.6241	0.0008	0.0006	0.1693	+++	0.3096	0.0009	0.0004	0.02962	++++	0.4938	0.0009	0.0003	0.003963	++	0.1414
cg09033472	0.0026	0.0007	0.0001381	chr13	++++++++--	0.07867	114890805	0.0028	0.0007	0.0001692	++++++-	0.1026	0.0016	0.0018	0.3859	++-	0.1035	0.0028	0.0014	0.04192	+++-	0.1354	0.0022	0.0011	0.05456	+-	0.006924
cg21761639	0.0054	0.0014	0.0001389	chr7	-+++++++++	0.3557	31533786	0.0055	0.0015	0.0002128	+++++++	0.198	0.004	0.0042	0.3392	-++	0.5391	0.0062	0.0038	0.1043	-+++	0.4603	0.003	0.0029	0.2866	++	0.9782
cg25439632	-0.0035	0.0009	0.0001411	chr8	?--+-+----	0.0511	49892209	-0.0033	0.0009	0.0005267	-+-+---	0.02265	-0.0054	0.0032	0.09066	?--	0.5602	-0.0049	0.0021	0.01678	?---	0.8304	-0.0028	0.0013	0.02754	--	0.8558
cg20436458	0.0022	0.0006	0.000143	chr2	++++?+++++	0.7824	68149422	0.0023	0.0006	0.0002397	++?++++	0.7371	0.0016	0.0015	0.285	+++	0.3998	0.0026	0.0011	0.01514	++++	0.4504	0.0023	0.0009	0.01382	++	0.2568
cg22240472	-0.0006	0.0002	0.0001438	chr11	+---+---+-	0.788	17498517	-0.0007	0.0002	5.856e-05	--+----	0.7374	0.0001	0.0005	0.9146	+-+	0.8823	-0.0004	0.0004	0.2744	+--+	0.6869	-0.0007	0.0002	0.0002437	--	0.9649
cg14188774	0.0087	0.0023	0.0001446	chr7	+-+++++-++	0.6244	42896343	0.0098	0.0024	6.794e-05	+++++-+	0.6143	0.0015	0.0063	0.8048	+-+	0.5567	-0.0013	0.0055	0.8097	+--+	0.5666	0.0105	0.0057	0.06384	++	0.5608
cg09365529	0.005	0.0013	0.0001481	chr1	++++?+++-+	0.6772	75140289	0.0048	0.0014	0.0006564	++?++++	0.9392	0.0062	0.0036	0.0877	++-	0.1138	0.0066	0.0028	0.01836	+++-	0.2229	0.0041	0.0022	0.05746	++	0.8589
cg10928426	-0.0017	0.0004	0.0001508	chr7	----------	0.7478	127997529	-0.0016	0.0005	0.0005778	-------	0.5828	-0.002	0.0013	0.1069	---	0.5663	-0.0027	0.001	0.006132	----	0.5837	-0.0016	0.0007	0.0249	--	0.1568
cg03718883	0.003	0.0008	0.0001514	chr11	++++++++--	0.7339	2098414	0.003	0.0008	0.0004245	++++++-	0.8114	0.0029	0.0021	0.1643	++-	0.2144	0.0032	0.0017	0.05906	+++-	0.3745	0.0027	0.0014	0.05485	+-	0.3056
cg06729093	0.0008	0.0002	0.0001519	chr10	-+++++?+-+	0.7995	38261823	0.0009	0.0002	8.336e-05	++++?++	0.9213	0.0002	0.0006	0.7368	-+-	0.3817	0.0006	0.0005	0.1827	-++-	0.3885	0.0008	0.0003	0.002342	++	0.4232
cg10482149	0.0007	0.0002	0.0001524	chr3	+++++-++++	0.1795	127771091	0.0006	0.0002	0.005608	+++-+++	0.1031	0.001	0.0004	0.005589	+++	0.5838	0.0009	0.0003	0.0005759	++++	0.7483	0.0005	0.0003	0.145	++	0.03983
cg19421752	0.0025	0.0007	0.0001527	chr5	++++++-+++	0.445	1225224	0.0024	0.0007	0.000568	++++-++	0.242	0.0033	0.0021	0.1044	+++	0.6727	0.0029	0.0016	0.0676	++++	0.8278	0.002	0.001	0.0394	++	0.5256
cg22308501	0.0003	0.0001	0.0001567	chr8	++++?+-+++	0.5159	133493424	0.0004	0.0001	0.0001035	++?+-++	0.3686	0.0001	0.0002	0.5042	+++	0.7553	0.0003	0.0002	0.0591	++++	0.2553	0.0003	0.0001	0.006257	++	0.67
cg16775678	0.0003	0.0001	0.0001576	chr13	++++++++++	0.8738	52158057	0.0003	0.0001	0.001805	+++++++	0.9981	0.0007	0.0003	0.01082	+++	0.3512	0.0005	0.0002	0.0158	++++	0.3369	0.0003	0.0001	0.006655	++	0.9354
cg08409642	-0.0036	0.0009	0.0001601	chr16	-+--------	0.2831	56641373	-0.0036	0.001	0.0003868	-------	0.745	-0.0032	0.0025	0.1956	-+-	0.02497	-0.002	0.002	0.2973	-+--	0.04662	-0.005	0.0019	0.01053	--	0.6547
cg05846642	0.0106	0.0028	0.000161	chr7	??????+???	1	143318036	0.0106	0.0028	0.000161	????+??	1	NA	NA	NA	NA	NA	NA	NA	NA	NA	NA	NA	NA	NA	NA	NA
cg18126557	-0.0017	0.0005	0.0001612	chr1	-----+---+	0.6488	247611842	-0.0016	0.0006	0.003042	---+--+	0.4955	-0.0019	0.0008	0.01873	---	0.4888	-0.0018	0.0006	0.004525	----	0.6925	-0.0027	0.0008	0.001611	-+	0.212
cg18153326	0.0005	0.0001	0.0001635	chr1	-+++-++++-	0.8712	42922229	0.0005	0.0002	0.003479	++-+++-	0.7122	0.0006	0.0003	0.01615	-++	0.7028	0.0006	0.0002	0.0006247	-+++	0.8716	0.0006	0.0003	0.03558	+-	0.5611
cg24513449	0.0009	0.0002	0.000166	chr8	+-++++++++	0.9694	145599544	0.0009	0.0002	0.0001488	+++++++	0.9333	0.0003	0.001	0.7323	+-+	0.7065	0.0005	0.0008	0.5725	+-++	0.8623	0.0008	0.0003	0.002858	++	0.8484
cg24539517	-0.0051	0.0013	0.0001662	chr10	-+--?---+-	0.293	121161258	-0.0063	0.0015	1.75e-05	--?----	0.4442	0.0016	0.0034	0.642	-++	0.8343	-0.0021	0.0028	0.4542	-+-+	0.2709	-0.0098	0.0025	9.889e-05	--	0.5375
cg18894214	-0.0067	0.0018	0.000167	chr5	--------+-	0.2394	3181925	-0.0059	0.0019	0.002123	-------	0.5416	-0.0124	0.005	0.01273	--+	0.07947	-0.0106	0.0043	0.01343	---+	0.1354	-0.0127	0.0039	0.001283	--	0.734
cg24839718	0.0012	0.0003	0.0001688	chr19	+++++-++++	0.8365	37568953	0.0013	0.0004	0.001231	+++-+++	0.7653	0.0011	0.0006	0.05233	+++	0.4542	0.0011	0.0004	0.009366	++++	0.6625	0.0018	0.0008	0.03159	++	0.2819
cg23244559	-0.0028	0.0007	0.0001714	chr4	-+--?-----	0.5745	74965262	-0.0032	0.0008	7.844e-05	--?----	0.5441	-0.0007	0.0018	0.7083	-+-	0.6061	-0.0022	0.0013	0.0932	-+--	0.5154	-0.0034	0.0012	0.003116	--	0.3986
cg21529699	-0.0009	0.0002	0.0001724	chr7	++--------	0.8069	148991998	-0.0009	0.0002	0.0001221	-------	0.6803	-0.0002	0.0009	0.854	++-	0.7227	-0.001	0.0006	0.1082	++--	0.481	-0.0007	0.0003	0.01705	--	0.4899
cg21161138	-0.0029	0.0008	0.0001731	chr5	---+------	0.01727	399360	-0.0026	0.0008	0.001286	-+-----	0.05125	-0.0067	0.0028	0.01684	---	0.06058	-0.0084	0.0023	0.0002785	----	0.08347	-0.0033	0.0011	0.001967	--	0.04995
cg06644428	-0.0029	0.0008	0.0001736	chr2	----+----?	0.4463	233284112	-0.0026	0.0008	0.00177	--+---?	0.3234	-0.0043	0.002	0.02592	---	0.4956	-0.0047	0.0015	0.001779	----	0.684	-0.0026	0.0014	0.05666	-?	1
cg02902975	-0.0044	0.0012	0.0001742	chr16	---?------	0.4778	67360129	-0.0047	0.0013	0.0003489	-?-----	0.2194	-0.0032	0.0025	0.2033	---	0.8931	-0.0038	0.0019	0.05044	----	0.9434	-0.0038	0.0021	0.07297	--	0.1119
cg03079818	-0.0029	0.0008	0.0001756	chr13	---?-----+	0.8782	110324798	-0.0027	0.0009	0.002043	-?----+	0.6122	-0.0033	0.0015	0.03089	---	0.956	-0.0029	0.0012	0.01767	----	0.9638	-0.0028	0.0011	0.01143	-+	0.1123
cg06975067	-0.0041	0.0011	0.0001767	chr13	--+------+	0.8774	20692525	-0.0037	0.0013	0.003564	+-----+	0.6651	-0.0051	0.0021	0.01527	---	0.9636	-0.0044	0.0014	0.001091	----	0.9698	0.0016	0.0034	0.6452	++	0.6514
cg23057687	0.0289	0.0077	0.0001778	chr4	?????????+	1	91760659	0.0289	0.0077	0.0001778	??????+	1	NA	NA	NA	NA	NA	NA	NA	NA	NA	NA	0.0289	0.0077	0.0001778	?+	1
cg12783776	-0.0014	0.0004	0.0001779	chr11	-+--+-+---	0.02792	57365948	-0.0016	0.0004	0.0001218	--+-+--	0.009044	-0.0005	0.001	0.5877	-+-	0.7332	-0.0012	0.0007	0.07236	-+--	0.638	-0.0021	0.0007	0.001136	--	0.6321
cg23007898	-0.001	0.0003	0.0001781	chr6	+--------+	0.08227	27263965	-0.001	0.0003	0.0002106	------+	0.03258	-0.0006	0.0008	0.4499	+--	0.5152	-0.0007	0.0006	0.265	+---	0.707	0	0.0005	0.9277	-+	0.01251
cg22219489	0.0002	0	0.0001786	chr4	--++++++++	0.7157	122745136	0.0001	0.0001	0.02056	+++++++	0.706	0.0002	0.0001	0.002479	--+	0.3717	0.0002	0	0.0008029	--++	0.3956	0.0002	0.0004	0.6214	++	0.9927
cg17173498	-0.0002	0.0001	0.0001805	chr1	-----+--++	0.159	2985494	-0.0002	0.0001	0.0001232	---+--+	0.1579	0	0.0003	0.9839	--+	0.2155	-0.0004	0.0002	0.07709	---+	0.1028	-0.0002	0.0001	0.003915	-+	0.5439
cg01553209	-0.0003	0.0001	0.000181	chr10	----+-----	0.08631	22625874	-0.0003	0.0001	0.002289	--+----	0.03066	-0.0005	0.0002	0.01674	---	0.88	-0.0003	0.0001	0.0564	----	0.4825	-0.0004	0.0001	0.0001746	--	0.03206
cg03998866	-0.0023	0.0006	0.0001811	chr16	???-?????-	0.2946	88935317	-0.0023	0.0006	0.0001811	?-????-	0.2946	NA	NA	NA	NA	NA	NA	NA	NA	NA	NA	-0.0005	0.0018	0.7849	?-	1
cg14953666	0.0046	0.0012	0.0001831	chr2	+-+++++++-	0.3947	16162992	0.0042	0.0013	0.001585	++++++-	0.6904	0.0082	0.0036	0.02375	+-+	0.1063	0.0059	0.003	0.04907	+-++	0.1243	0.0033	0.0027	0.2209	+-	0.8276
cg12695685	-0.0018	0.0005	0.0001839	chr11	---?+-----	0.6264	33890131	-0.0015	0.0006	0.006406	-?+----	0.5259	-0.0025	0.0009	0.006983	---	0.5219	-0.0021	0.0007	0.002299	----	0.6302	-0.0014	0.0008	0.07741	--	0.9745
cg12097989	-0.0054	0.0015	0.0001861	chr1	----?----+	0.7137	7311176	-0.0048	0.0016	0.002047	--?---+	0.9235	-0.0096	0.004	0.0168	---	0.2543	-0.0074	0.0033	0.02646	----	0.2945	-0.0071	0.0028	0.01253	-+	0.6077
cg16177445	0.0061	0.0016	0.0001882	chr3	+-+??+++++	0.9216	65469946	0.0066	0.0018	0.0003691	+??++++	0.982	0.0044	0.0035	0.2118	+-+	0.3926	0.0051	0.0031	0.09681	+-++	0.5603	0.0065	0.0022	0.003257	++	0.5475
cg05013783	0.0002	0.0001	0.0001905	chr12	+++----+-+	0.002498	56652058	0.0002	0.0001	0.000266	+----++	0.01421	0.0004	0.0004	0.3923	++-	0.008901	0.001	0.0003	0.002164	+++-	0.004519	0.0002	0.0001	0.0002794	++	0.8007
cg05424060	-0.0031	0.0008	0.0001913	chr7	-+---+---+	0.1608	79768675	-0.0032	0.0009	0.000277	---+--+	0.09648	-0.0025	0.0029	0.3875	-+-	0.3265	-0.0052	0.0026	0.04599	-+--	0.06113	-0.0035	0.0013	0.008166	-+	0.138
cg10489786	0.0008	0.0002	0.0001913	chr11	++?++-++++	0.6805	118938260	0.0007	0.0002	0.003371	?++-+++	0.3792	0.0009	0.0004	0.0184	+++	0.9258	0.0009	0.0003	0.003801	++++	0.9845	0.0021	0.0013	0.1011	?+	1
cg23305768	-0.0018	0.0005	0.0001917	chr5	----++----	0.5913	148521464	-0.0017	0.0005	0.00107	--++---	0.4486	-0.0022	0.0012	0.06577	---	0.4756	-0.0029	0.0009	0.0008322	----	0.5385	-0.002	0.0008	0.01075	--	0.6212
cg05589784	-0.0074	0.002	0.000193	chr5	----+--++-	0.02206	2915123	-0.0083	0.0021	0.000105	--+--+-	0.01957	-0.002	0.0051	0.6882	--+	0.2238	-0.0012	0.0043	0.787	--++	0.3768	-0.0142	0.0047	0.002577	--	0.5768
cg22422090	0.0013	0.0004	0.0001934	chr5	++++-+++++	0.2878	137024724	0.0011	0.0004	0.005322	++-++++	0.6111	0.0026	0.0009	0.003549	+++	0.1377	0.0023	0.0006	0.0002375	++++	0.2467	0.0009	0.0005	0.101	++	0.7837
cg11674355	-0.0055	0.0015	0.000194	chr2	------++++	0.03488	65610261	-0.006	0.0016	0.0001682	----+++	0.009548	-0.0025	0.0037	0.4911	--+	0.8374	0.0009	0.0031	0.7703	--++	0.3755	-0.0039	0.0035	0.2735	-+	0.7447
cg20649689	0.0118	0.0032	0.0001946	chr6	?+???+????	0.01678	30455885	0.0338	0.0097	0.0005041	???+???	1	0.0092	0.0034	0.006163	?+?	1	0.0092	0.0034	0.006163	?+??	1	NA	NA	NA	NA	NA
cg11678639	0.0005	0.0001	0.0001962	chr5	++++++++-+	0.5404	174961318	0.0005	0.0001	0.0001418	+++++++	0.4208	0.0002	0.0003	0.606	++-	0.5947	0.0006	0.0002	0.009947	+++-	0.102	0.0004	0.0002	0.02337	++	0.573
cg02459569	-0.0024	0.0006	0.0001963	chr1	-+--------	0.6216	150944634	-0.0023	0.0007	0.0007799	-------	0.903	-0.0028	0.0017	0.1026	-+-	0.08681	-0.0025	0.0014	0.08564	-+--	0.1702	-0.003	0.0011	0.008571	--	0.484
cg21308575	-0.0033	0.0009	0.0001963	chr19	-----+--+-	0.3537	6887544	-0.0038	0.001	0.0001151	---+---	0.4784	-0.0011	0.0022	0.6177	--+	0.2038	-0.0033	0.0018	0.07041	---+	0.09343	-0.0037	0.0016	0.0189	--	0.2539
cg05053688	0.0003	0.0001	0.0001997	chr1	-++-+-++++	0.3138	101702744	0.0003	0.0001	0.0004873	+-+-+++	0.7126	0.0006	0.0004	0.1588	-++	0.04033	0.0004	0.0003	0.1497	-+++	0.08219	0.0004	0.0001	0.000338	++	0.8091
cg01256681	-0.0024	0.0006	0.0002012	chr19	-+--+---+-	0.04262	17447362	-0.003	0.0007	1.442e-05	--+----	0.2427	0.0011	0.0016	0.4838	-++	0.1359	-0.0016	0.0012	0.1846	-+-+	0.01719	-0.0032	0.0011	0.003637	--	0.3478
cg24902113	0.0008	0.0002	0.0002023	chr13	+++++-++++	0.9244	33160718	0.0008	0.0002	0.0006043	+++-+++	0.7365	0.0008	0.0006	0.1523	+++	0.8884	0.0011	0.0004	0.006458	++++	0.8601	0.0007	0.0003	0.03162	++	0.8686
cg16557355	0.0005	0.0001	0.0002031	chr20	-++++-+++-	0.5293	1446937	0.0004	0.0001	0.0009335	+++-++-	0.8264	0.0008	0.0004	0.06605	-++	0.09741	0.0005	0.0003	0.09886	-+++	0.1371	0.0005	0.0002	0.002821	+-	0.6694
cg14981232	0.0006	0.0002	0.0002032	chr3	+++-+-++++	0.04076	128997662	0.0004	0.0002	0.02517	+-+-+++	0.2255	0.001	0.0003	0.0004582	+++	0.05275	0.0009	0.0002	0.000327	++++	0.0776	0.0006	0.0003	0.01599	++	0.04432
cg05460776	0.0006	0.0002	0.0002042	chr16	+++-++++++	0.5067	4031231	0.0006	0.0002	0.0004527	+-+++++	0.4671	0.0006	0.0005	0.2219	+++	0.2653	0.0009	0.0004	0.01585	++++	0.344	0.0006	0.0002	0.002464	++	0.88
cg07735998	-0.0048	0.0013	0.0002043	chr8	?----+----	0.1226	59789984	-0.0048	0.0013	0.0003215	---+---	0.05138	-0.0041	0.0043	0.3488	?--	0.6941	-0.0067	0.0039	0.08708	?---	0.3476	-0.0018	0.0026	0.4785	--	0.06205
cg12061357	-0.0007	0.0002	0.0002052	chr21	+------+--	0.5275	46131601	-0.0007	0.0002	0.0003699	-----+-	0.3546	-0.0007	0.0007	0.2932	+--	0.4922	0	0.0005	0.9809	+-+-	0.3423	-0.001	0.0003	0.0002711	--	0.6552
cg16146177	-0.0001	0	0.0002057	chr4	++----+---	0.2756	41883608	-0.0001	0	0.0003372	----+--	0.2911	-0.0001	0.0001	0.335	++-	0.1599	-0.0001	0.0001	0.185	++--	0.2992	-0.0001	0	0.001069	--	0.8857
cg06876354	-0.0024	0.0006	0.000206	chr2	++-------?	0.4503	121020189	-0.0026	0.0007	0.0001159	------?	0.9765	-0.0004	0.002	0.851	++-	0.05225	-0.0018	0.0016	0.2742	++--	0.06595	-0.0027	0.0014	0.04699	-?	1
cg17518036	0.0002	0.0001	0.000208	chr6	+++-+-++-+	0.03399	33256540	0.0003	0.0001	0.0001139	+-+-+++	0.05793	0.0001	0.0001	0.6062	++-	0.1044	0.0001	0.0001	0.5412	+++-	0.2106	0.0004	0.0001	4.124e-05	++	0.01133
cg06179645	0.001	0.0003	0.0002094	chr1	+++-+-++++	0.05887	151119372	0.0008	0.0003	0.004926	+-+-+++	0.05224	0.002	0.0007	0.00365	+++	0.5161	0.0018	0.0005	0.0003941	++++	0.6873	0.0011	0.0005	0.02706	++	0.006563
cg07985589	0.0027	0.0007	0.0002108	chr11	+++++++---	0.6576	133229994	0.0026	0.0008	0.0008118	+++++--	0.5658	0.0051	0.0028	0.07077	++-	0.5417	0.004	0.0027	0.1322	++--	0.4681	0.0017	0.0011	0.1104	+-	0.1648
cg20620783	-0.0007	0.0002	0.000213	chr11	++---+----	0.5611	7870238	-0.0008	0.0002	0.0001005	---+---	0.4165	0	0.0007	0.9649	++-	0.8789	-0.0006	0.0005	0.2892	++--	0.5299	-0.0007	0.0003	0.005967	--	0.7912
cg23649435	-0.0005	0.0001	0.000214	chr4	------+---	0.2332	184826421	-0.0005	0.0001	0.0002509	----+--	0.1113	-0.0003	0.0005	0.5166	---	0.5473	-0.0005	0.0003	0.1529	----	0.719	-0.0005	0.0002	0.004104	--	0.006515
cg04834436	-0.0027	0.0007	0.0002141	chr16	------?---	0.2937	55362754	-0.0027	0.0008	0.001123	----?--	0.1545	-0.003	0.0017	0.07781	---	0.4595	-0.0022	0.0013	0.09634	----	0.5534	-0.0043	0.0015	0.005508	--	0.02735
cg02096793	-0.0023	0.0006	0.0002211	chr4	----------	0.8481	683148	-0.0024	0.0007	0.0005638	-------	0.6446	-0.002	0.0015	0.1807	---	0.7554	-0.0026	0.0012	0.03327	----	0.8037	-0.003	0.0011	0.007649	--	0.09834
cg16975973	0.0006	0.0002	0.0002216	chr12	-+++++++++	0.852	77459865	0.0005	0.0002	0.0009433	+++++++	0.9963	0.0011	0.0006	0.05417	-++	0.2039	0.001	0.0005	0.03616	-+++	0.3382	0.0005	0.0002	0.004402	++	0.8666
cg22801799	0.0003	0.0001	0.0002221	chr8	+++++-+++-	0.7548	134072526	0.0002	0.0001	0.001429	+++-++-	0.6314	0.0003	0.0002	0.05377	+++	0.5322	0.0003	0.0001	0.01664	++++	0.7013	0.0003	0.0001	0.002418	+-	0.1656
cg18230137	0.0004	0.0001	0.0002232	chr10	-++++-++++	0.7886	126433201	0.0004	0.0001	0.0006528	+++-+++	0.8812	0.0005	0.0003	0.1504	-++	0.2171	0.0006	0.0002	0.008839	-+++	0.3111	0.0004	0.0001	0.008229	++	0.9458
cg22433574	0.0001	0	0.0002237	chr17	++++-++++-	0.01269	35849808	0.0001	0	0.0004755	++-+++-	0.01712	0.0001	0.0001	0.2315	+++	0.06279	0.0001	0	0.04499	++++	0.131	0.0001	0	0.002748	+-	0.7544
cg11067907	0.002	0.0005	0.0002259	chr12	++++++++++	0.8485	49319500	0.0021	0.0007	0.001119	+++++++	0.7305	0.0017	0.001	0.0786	+++	0.5705	0.0014	0.0008	0.09591	++++	0.6666	0.0027	0.0011	0.01309	++	0.8578
cg06256944	0.0004	0.0001	0.0002262	chr10	?+++?+++-+	0.7467	88137287	0.0005	0.0001	0.0001009	++?++++	0.9963	0	0.0004	0.9781	?+-	0.1214	0.0003	0.0003	0.3302	?++-	0.1761	0.0005	0.0001	0.0006221	++	0.8722
cg01201512	0.0252	0.0068	0.0002263	chr12	+-++++++++	0.07733	740338	0.0241	0.0076	0.001432	+++++++	0.08474	0.0296	0.0158	0.06013	+-+	0.1157	0.0263	0.0137	0.0553	+-++	0.2124	0.0121	0.0145	0.4063	++	0.1385
cg00604112	0.006	0.0016	0.0002274	chr7	+??+?????+	0.6628	27287288	0.0064	0.0017	0.0001602	?+????+	0.7373	0.0013	0.0058	0.8205	+??	1	0.0013	0.0058	0.8205	+???	1	0.0119	0.0167	0.4741	?+	1
cg22108980	0.0047	0.0013	0.0002274	chr7	+++++++++-	0.5054	45927824	0.0045	0.0014	0.0008928	++++++-	0.3541	0.0058	0.0035	0.1031	+++	0.465	0.008	0.003	0.007744	++++	0.386	0.0033	0.003	0.2711	+-	0.5541
cg21533369	0.0004	0.0001	0.0002311	chr22	++++-+++++	0.6203	31892152	0.0004	0.0001	0.003076	++-++++	0.5549	0.0004	0.0002	0.02842	+++	0.3258	0.0003	0.0001	0.0355	++++	0.4	0.0006	0.0003	0.0436	++	0.9361
cg08587504	-0.0026	0.0007	0.0002325	chr20	-+-----+--	0.4665	34639686	-0.0028	0.0007	0.0001886	-----+-	0.2719	-0.001	0.0021	0.6212	-+-	0.7836	-0.0007	0.0017	0.6926	-++-	0.902	-0.001	0.0012	0.433	--	0.4007
cg18452973	0.0068	0.0019	0.000233	chr12	+++?+-+-++	0.1801	3446004	0.0047	0.0021	0.02836	+?+-+-+	0.3101	0.0136	0.0038	0.0003217	+++	0.5388	0.011	0.0034	0.001198	++-+	0.2977	0.0021	0.0034	0.5409	++	0.9961
cg09205611	0.0013	0.0003	0.0002336	chr15	+-+-+++++?	0.03522	51631256	0.0012	0.0004	0.001114	+-++++?	0.03638	0.0017	0.001	0.07622	+-+	0.1094	0.0026	0.0006	1.617e-05	+-++	0.1123	0.0007	0.0005	0.2172	+?	1
cg00555339	0.0029	0.0008	0.0002339	chr6	++++?++++-	0.04992	1102438	0.0027	0.0009	0.002621	++?+++-	0.02161	0.0033	0.0015	0.0324	+++	0.3292	0.0026	0.0013	0.0374	++++	0.4271	0.0009	0.0013	0.5063	+-	0.5813
cg12582317	-0.0057	0.0016	0.0002366	chr17	----------	0.7312	55822272	-0.0059	0.0017	0.0004936	-------	0.593	-0.0047	0.0039	0.2278	---	0.5003	-0.0069	0.0033	0.03278	----	0.488	-0.0057	0.0031	0.06606	--	0.121
cg26547924	-0.0003	0.0001	0.0002382	chr1	----?-+---	0.322	215256870	-0.0004	0.0002	0.008252	?------	0.8874	-0.0007	0.0002	0.007186	---	0.8924	-0.0002	0.0002	0.1974	----	0.905	-0.0003	0.0001	0.003711	--	0.2483
cg10512875	-0.0005	0.0001	0.0002382	chr12	--?-------	0.9549	29936174	-0.0004	0.0001	0.0002579	--?-+--	0.1344	-0.0002	0.0003	0.5019	---	0.7708	-0.0005	0.0002	0.002722	----	0.7133	-0.0012	0.0023	0.6077	?-	1
cg17191872	0.0008	0.0002	0.00024	chr17	++++--++++	0.3663	34432841	0.0008	0.0003	0.001188	++--+++	0.6638	0.0009	0.0005	0.08384	+++	0.05776	0.0011	0.0003	0.0009818	++++	0.1008	0.0006	0.0003	0.06849	++	0.5359
cg11963233	0.0024	0.0007	0.0002403	chr18	++++++++++	0.8305	25754301	0.0024	0.0007	0.0008087	+++++++	0.6091	0.0028	0.0018	0.1284	+++	0.7805	0.004	0.0014	0.005851	++++	0.6521	0.0014	0.001	0.1571	++	0.8767
cg02916809	0.0008	0.0002	0.0002425	chr4	++++++++++	0.9722	1003208	0.0008	0.0002	0.0005968	+++++++	0.885	0.0007	0.0005	0.1883	+++	0.8232	0.0008	0.0004	0.0461	++++	0.9177	0.0006	0.0003	0.05354	++	0.528
cg09852798	-0.0009	0.0003	0.0002438	chr10	++-+---+-+	0.352	135333425	-0.001	0.0003	0.0001251	-+---++	0.7885	0.0005	0.0012	0.6982	++-	0.06667	0.0005	0.0011	0.6479	+++-	0.1421	-0.0012	0.0003	4.348e-05	-+	0.7079
cg00777537	0.0005	0.0001	0.0002443	chr12	+++++-+++-	0.7618	102091297	0.0004	0.0001	0.003151	+++-++-	0.7908	0.0008	0.0003	0.01174	+++	0.5992	0.0007	0.0002	0.001322	++++	0.752	0.0003	0.0002	0.04664	+-	0.3103
cg15582257	0.001	0.0003	0.0002443	chr12	+++++-+-++	0.414	104536393	0.0009	0.0003	0.0009997	+++-+-+	0.2025	0.0016	0.0009	0.07584	+++	0.8988	0.0004	0.0007	0.5837	++-+	0.2003	0.0008	0.0004	0.01657	++	0.2458
cg20555772	-0.0025	0.0007	0.0002477	chr6	----------	0.7665	137630455	-0.0026	0.0008	0.0006495	-------	0.669	-0.0023	0.0017	0.1762	---	0.4391	-0.0018	0.0013	0.1715	----	0.606	-0.0036	0.0014	0.007702	--	0.9067
cg23242863	-0.0009	0.0002	0.0002487	chr1	-+--+----+	0.8551	151032723	-0.0009	0.0003	0.0008525	--+---+	0.6173	-0.0008	0.0005	0.1269	-+-	0.868	-0.0009	0.0003	0.005389	-+--	0.9536	-0.0009	0.0005	0.0685	-+	0.3051
cg06613095	-0.0007	0.0002	0.0002503	chr3	-+------++	0.6814	137483617	-0.0008	0.0002	9.07e-05	------+	0.7686	0	0.0006	0.9427	-++	0.5108	-0.0003	0.0004	0.4782	-+-+	0.5652	-0.0007	0.0003	0.006481	-+	0.1664
cg27533237	-0.0012	0.0003	0.000251	chr3	?---+-+---	0.3458	168866773	-0.0011	0.0004	0.003716	--+-+--	0.2498	-0.002	0.0008	0.01351	?--	0.9843	-0.0018	0.0005	0.000477	?---	0.9514	-0.0011	0.0005	0.03155	--	0.7122
cg12592276	0.0028	0.0008	0.0002522	chr12	+++??++++-	0.1559	3427813	0.002	0.0008	0.01539	+??+++-	0.3877	0.0064	0.0018	0.0004386	+++	0.4384	0.0048	0.0013	0.0001655	++++	0.3633	0.001	0.001	0.3485	+-	0.5181
cg03742705	-0.0025	0.0007	0.0002541	chr1	-----+---+	0.9045	1406266	-0.0024	0.0008	0.001524	---+--+	0.7871	-0.0031	0.0017	0.06188	---	0.6783	-0.0027	0.0014	0.05317	----	0.8092	-0.0025	0.0013	0.04966	-+	0.2827
cg17980786	-0.0031	0.0008	0.0002557	chr3	-+------+-	0.3	32933637	-0.0034	0.0009	0.0001776	-------	0.1716	-0.0009	0.0025	0.7121	-++	0.67	-0.002	0.0021	0.3328	-+-+	0.7002	-0.0053	0.0016	0.0009773	--	0.04428
cg02515217	0.0025	0.0007	0.000256	chr17	++++++++-+	0.9753	57918600	0.0027	0.0007	0.0002225	+++++++	0.9503	0.0011	0.0021	0.6109	++-	0.7638	0.0019	0.0018	0.2913	+++-	0.7748	0.0026	0.001	0.007311	++	0.7158
cg09597070	-0.0004	0.0001	0.0002565	chr12	?---+-+--+	0.4045	54088972	-0.0004	0.0001	0.0004901	--+-+-+	0.2264	-0.0004	0.0004	0.271	?--	0.7094	-0.0007	0.0003	0.005271	?---	0.5496	-0.0004	0.0001	0.01261	-+	0.2062
cg00120464	0.001	0.0003	0.0002573	chr4	-++++----+	0.6404	146842191	0.001	0.0003	0.0003072	+++---+	0.3513	0.001	0.0018	0.5642	-+-	0.8665	0.0006	0.0017	0.7211	-+--	0.6143	0.0011	0.0003	0.0004037	++	0.07929
cg12194745	-0.003	0.0008	0.0002598	chr17	++--------	0.8573	79423649	-0.0034	0.0009	0.0001018	-------	0.8344	0.0001	0.0025	0.9796	++-	0.9172	-0.0017	0.002	0.3788	++--	0.6587	-0.0049	0.0015	0.0008515	--	0.4922
cg14601560	0.0008	0.0002	0.0002602	chr2	+++++-++++	0.9585	238970191	0.0008	0.0002	0.0002629	+++-+++	0.9312	0.0004	0.0005	0.4433	+++	0.7048	0.0007	0.0004	0.09318	++++	0.7209	0.0009	0.0004	0.007258	++	0.9774
cg19148051	0.0003	0.0001	0.0002612	chr1	+++-+-+++-	0.8385	3713096	0.0003	0.0001	0.0008743	+-+-++-	0.6657	0.0004	0.0003	0.1187	+++	0.7082	0.0005	0.0002	0.004237	++++	0.7439	0.0002	0.0001	0.0237	+-	0.6879
cg08904394	-0.0029	0.0008	0.0002624	chr11	-+---+----	0.4142	64108902	-0.0026	0.0008	0.002346	---+---	0.7151	-0.0054	0.0023	0.02047	-+-	0.1206	-0.0046	0.0019	0.015	-+--	0.2069	-0.0035	0.0013	0.01007	--	0.5675
cg14266248	-0.0031	0.0008	0.0002627	chr8	-+-?-----+	0.4023	62606211	-0.0035	0.0009	0.0001565	-?----+	0.6312	-0.001	0.0021	0.6289	-+-	0.1595	-0.0028	0.0017	0.09011	-+--	0.1141	-0.0028	0.0013	0.0239	-+	0.7405
cg12315466	-0.0022	0.0006	0.0002633	chr2	----------	0.8246	233923814	-0.0021	0.0006	0.0005919	-------	0.6139	-0.0022	0.0018	0.2183	---	0.7253	-0.0036	0.0014	0.009777	----	0.5443	-0.0023	0.0009	0.01238	--	0.3149
cg24997944	-0.0008	0.0002	0.0002633	chr3	-+--?----+	0.8764	19189709	-0.0008	0.0002	0.0002809	--?---+	0.8115	-0.0004	0.0007	0.5488	-+-	0.5279	-0.0008	0.0005	0.07759	-+--	0.5824	-0.0007	0.0002	0.004674	-+	0.5387
cg03193328	-0.0029	0.0008	0.0002668	chr7	++--------	0.6735	65746852	-0.0032	0.0008	0.0001983	-------	0.6487	-0.0011	0.0022	0.6299	++-	0.4373	-0.0017	0.0016	0.3006	++--	0.6053	-0.0036	0.0013	0.005209	--	0.7003
cg11498740	-0.0007	0.0002	0.0002677	chr14	-+--------	0.7518	93650664	-0.0008	0.0002	0.0001671	-------	0.6225	-0.0002	0.0005	0.6634	-+-	0.8172	-0.0006	0.0004	0.09285	-+--	0.6879	-0.0007	0.0003	0.01498	--	0.237
cg24964368	-0.0025	0.0007	0.000268	chr19	-----+----	0.6253	52264413	-0.0025	0.0007	0.0007924	---+---	0.4099	-0.0027	0.0019	0.1533	---	0.6133	-0.0031	0.0013	0.01816	----	0.7927	-0.0037	0.0011	0.0007208	--	0.9439
cg08813207	0.0007	0.0002	0.0002716	chr16	+++++-++-+	0.378	2198777	0.0008	0.0002	0.0002554	+++-+++	0.375	0.0003	0.0005	0.5094	++-	0.2632	0.001	0.0004	0.01088	+++-	0.09843	0.0007	0.0003	0.00891	++	0.7647
cg15288420	0.0007	0.0002	0.0002726	chr10	-++-++-++-	0.3369	134495625	0.0007	0.0002	0.0003423	+-++-+-	0.1592	0.0007	0.0011	0.5138	-++	0.636	0.0011	0.0009	0.1841	-+++	0.7017	0.0007	0.0002	0.0005579	+-	0.6587
cg20861237	0.0215	0.0059	0.0002745	chr15	??????+???	1	101090531	0.0215	0.0059	0.0002745	????+??	1	NA	NA	NA	NA	NA	NA	NA	NA	NA	NA	NA	NA	NA	NA	NA
cg00065396	-0.0058	0.0016	0.0002751	chr6	---------+	0.9929	26594778	-0.0058	0.0018	0.001052	------+	0.9759	-0.0058	0.0037	0.1139	---	0.7113	-0.0051	0.0031	0.1022	----	0.8455	-0.006	0.0035	0.08336	-+	0.8409
cg11699925	-0.0004	0.0001	0.0002765	chr13	-+--+-----	0.1218	73634225	-0.0004	0.0001	0.002308	--+----	0.04053	-0.0006	0.0003	0.03698	-+-	0.8035	-0.0004	0.0002	0.0437	-+--	0.6711	-0.0005	0.0002	0.00803	--	0.5135
cg00426626	0.0004	0.0001	0.0002777	chr9	-++-+-++++	0.5644	132816402	0.0004	0.0001	0.0004146	+-+-+++	0.2719	0.0003	0.0004	0.3863	-++	0.933	0.0006	0.0003	0.03853	-+++	0.7402	0.0003	0.0001	0.006154	++	0.4181
cg00748373	-0.0007	0.0002	0.0002781	chr16	----+-----	0.9737	68676741	-0.0007	0.0002	0.0009432	--+----	0.8749	-0.0009	0.0006	0.1178	---	0.9369	-0.0008	0.0004	0.03529	----	0.9726	-0.0006	0.0003	0.0494	--	0.3454
cg07968770	-0.0029	0.0008	0.0002804	chr16	----------	0.3763	21170927	-0.0029	0.0009	0.0007574	-------	0.3368	-0.0031	0.0023	0.1727	---	0.2402	-0.0041	0.0017	0.01478	----	0.3551	-0.0025	0.0014	0.07233	--	0.668
cg22279027	-0.0006	0.0002	0.0002814	chr2	-+--?--??-	0.5491	160919034	-0.0007	0.0002	0.0001798	--?--?-	0.6886	0.0005	0.0011	0.6482	-+?	0.1986	0.0005	0.0011	0.6482	-+??	0.1986	-0.0007	0.0002	0.0007005	--	0.8324
ch.12.29902758F	-0.0002	0	0.0002825	chr12	---+---+--	0.2738	30011491	-0.0002	0.0001	0.002309	-+---+-	0.918	-0.0007	0.0002	0.002096	---	0.1788	-0.0003	0.0002	0.05238	--+-	0.02712	-0.0002	0.0001	0.00202	--	0.7169
cg24389389	0.0001	0	0.000285	chr4	+-+-+-++++	0.7527	141075404	0.0001	0	0.000567	+-+-+++	0.5032	0.0001	0.0001	0.2514	+-+	0.7714	0.0001	0	0.04859	+-++	0.8855	0.0001	0	0.003931	++	0.09312
cg13427827	0.0014	0.0004	0.0002853	chr9	++++++-+-?	0.4473	71152191	0.0015	0.0004	0.0001996	++++-+?	0.4015	0.0004	0.0012	0.7293	++-	0.3772	0.0015	0.0008	0.06078	+++-	0.2853	0.0012	0.0005	0.02207	+?	1
cg15722533	0.0017	0.0005	0.0002877	chr11	+-+++--+++	0.5902	12875566	0.0017	0.0005	0.0009176	+++--++	0.6854	0.0019	0.0013	0.1393	+-+	0.1744	0.0016	0.001	0.1115	+-++	0.3044	0.0016	0.0007	0.02212	++	0.335
cg22809017	-0.0025	0.0007	0.0002902	chr5	++-------+	0.1292	169373347	-0.0028	0.0007	0.0001622	------+	0.5438	-0.0006	0.0019	0.758	++-	0.02211	-0.0008	0.0016	0.6143	++--	0.05356	-0.001	0.0013	0.4531	-+	0.5311
cg22762215	-0.0019	0.0005	0.0002904	chr6	++--?----+	0.9353	29521272	-0.0019	0.0006	0.0008055	--?---+	0.8168	-0.0017	0.0012	0.1649	++-	0.694	-0.0018	0.0008	0.03247	++--	0.8643	-0.0022	0.0008	0.005163	-+	0.1845
cg04531704	-0.0021	0.0006	0.0002916	chr6	----+--+--	0.2126	27125388	-0.002	0.0006	0.001248	--+--+-	0.1312	-0.0029	0.0017	0.08386	---	0.3903	-0.0013	0.0011	0.2565	--+-	0.3101	-0.0039	0.0012	0.00102	--	0.4281
cg14823007	0.0001	0	0.000292	chr1	++++++++++	0.7775	7831605	0.0001	0	0.001083	+++++++	0.4734	0.0001	0.0001	0.1174	+++	0.9804	0.0001	0.0001	0.0824	++++	0.9924	0.0002	0.0001	0.0009259	++	0.1363
cg08271996	-0.0019	0.0005	0.0002926	chr1	---?---??-	0.06337	62739132	-0.0016	0.0007	0.01903	-?---?-	0.7794	-0.0025	0.0009	0.003851	--?	0.002121	-0.0025	0.0009	0.003851	--??	0.002121	-0.0014	0.001	0.1604	--	0.8121
cg13309018	0.0007	0.0002	0.0002936	chr9	+++++-++++	0.8758	130965761	0.0007	0.0002	0.001013	+++-+++	0.7	0.0007	0.0005	0.1288	+++	0.7156	0.0009	0.0003	0.006193	++++	0.6907	0.0006	0.0003	0.02664	++	0.5811
cg10064339	0.0002	0.0001	0.0002949	chr11	+++-+-+++-	0.9696	73693792	0.0002	0.0001	0.0006534	+-+-++-	0.8727	0.0002	0.0002	0.2226	+++	0.8208	0.0002	0.0001	0.1295	++++	0.9411	0.0002	0.0001	0.002773	+-	0.569
cg01656770	0.0003	0.0001	0.0002974	chr3	++++?-++++	0.1688	38496051	0.0003	0.0001	0.001499	++?-+++	0.3651	0.0006	0.0003	0.04583	+++	0.07401	0.0004	0.0002	0.07153	++++	0.103	0.0004	0.0001	0.000678	++	0.08348
cg16205490	0.0032	0.0009	0.0002996	chr2	+-++++++-?	0.9245	119077241	0.0035	0.0009	0.0001618	++++++?	0.9774	0.0002	0.0029	0.9591	+--	0.5494	0.0023	0.0019	0.2214	+-+-	0.5385	0.0029	0.0018	0.1046	+?	1
cg14693194	-0.0014	0.0004	0.0003006	chr18	----+++---	0.12	6415252	-0.0014	0.0004	0.0007406	--+++--	0.03571	-0.0017	0.0013	0.1852	---	0.7831	-0.0017	0.001	0.08222	----	0.921	-0.0022	0.0006	6.798e-05	--	0.1047
cg22489931	0.0059	0.0016	0.0003032	chr15	++++?-+-+-	0.3585	93595923	0.0049	0.002	0.01312	++?-+--	0.4129	0.0082	0.0029	0.005274	+++	0.2345	0.0069	0.0027	0.01084	++-+	0.2414	0.0061	0.0036	0.09471	+-	0.2457
cg20855763	0.0002	0.0001	0.0003034	chr17	+++-+-++++	0.1547	40761195	0.0002	0.0001	0.00109	+-+-+++	0.2294	0.0003	0.0002	0.1213	+++	0.08052	0.0002	0.0001	0.128	++++	0.14	0.0003	0.0001	0.005327	++	0.08972
cg07861564	-0.001	0.0003	0.0003066	chr12	-+----++--	0.2322	119616618	-0.001	0.0003	0.0004039	----++-	0.1629	-0.0007	0.0008	0.4068	-+-	0.3153	-0.0002	0.0006	0.6945	-++-	0.4046	-0.0015	0.0004	0.0001927	--	0.4731
cg15817969	-0.0601	0.0167	0.0003117	chr11	?????????-	1	117299038	-0.0601	0.0167	0.0003117	??????-	1	NA	NA	NA	NA	NA	NA	NA	NA	NA	NA	-0.0601	0.0167	0.0003117	?-	1
cg15775914	-0.004	0.0011	0.0003125	chr1	---?-++---	0.778	241799084	-0.0036	0.0012	0.002445	-?-++--	0.5744	-0.0068	0.0031	0.0303	---	0.9518	-0.0067	0.0026	0.01004	----	0.9915	-0.0047	0.0015	0.001734	--	0.5648
cg20569893	0.0008	0.0002	0.0003126	chr17	+++++-++++	0.7693	27220101	0.0008	0.0002	0.001927	+++-+++	0.7033	0.0012	0.0006	0.05051	+++	0.4842	0.0012	0.0004	0.005505	++++	0.6927	0.0006	0.0004	0.1018	++	0.1187
cg01392544	-0.0003	0.0001	0.0003135	chr10	+-----+++-	0.1266	18429760	-0.0003	0.0001	9.786e-05	----++-	0.1511	0.0004	0.0004	0.337	+-+	0.5101	0.0003	0.0003	0.2111	+-++	0.7142	-0.0004	0.0001	0.000105	--	0.3932
cg10768391	-0.0024	0.0007	0.0003164	chr6	+---------	0.354	16239574	-0.0023	0.0007	0.001297	-------	0.1856	-0.0031	0.0019	0.09632	+--	0.5995	-0.0042	0.0012	0.0008335	+---	0.6466	-0.0024	0.0012	0.04734	--	0.1527
cg17773660	0.0012	0.0003	0.0003194	chr2	+-+++-+++-	0.3389	202692984	0.0013	0.0004	0.0002129	+++-++-	0.6795	0.0003	0.001	0.7213	+-+	0.07145	0.0011	0.0006	0.07695	+-++	0.0861	0.0012	0.0005	0.009971	+-	0.288
cg07490151	0.0006	0.0002	0.0003233	chr6	+-+++++++-	0.5084	143772072	0.0005	0.0002	0.03469	++++++-	0.5431	0.0008	0.0003	0.002064	+-+	0.3278	0.0006	0.0002	0.00388	+-++	0.2603	-0.0001	0.0008	0.8917	+-	0.7304
cg02034311	0.0061	0.0017	0.0003257	chr13	++++++++-+	0.9743	112547999	0.0062	0.0018	0.0004943	+++++++	0.9625	0.0049	0.0053	0.361	++-	0.545	0.0048	0.0046	0.2931	+++-	0.7495	0.0098	0.0039	0.0135	++	0.6707
cg05886626	-0.0031	0.0009	0.0003264	chr15	----------	0.7861	39873553	-0.0027	0.0009	0.004244	-------	0.7537	-0.0051	0.0021	0.01587	---	0.6003	-0.0038	0.0016	0.01477	----	0.612	-0.0042	0.0018	0.01565	--	0.261
cg10784030	-0.0015	0.0004	0.0003265	chr1	-----+----	0.3878	38412688	-0.0015	0.0004	0.0008907	---+---	0.2418	-0.0015	0.0011	0.1714	---	0.4488	-0.0014	0.0007	0.04146	----	0.6572	-0.0011	0.0007	0.1274	--	0.2193
cg15540138	-0.0009	0.0002	0.0003277	chr4	----+-----	0.0748	166795622	-0.0008	0.0003	0.0008705	--+----	0.02741	-0.002	0.0012	0.09824	---	0.7711	-0.0025	0.001	0.009916	----	0.8306	-0.0009	0.0003	0.002413	--	0.05136
cg25130381	-0.0028	0.0008	0.0003288	chr1	-+----+---	0.2145	27440721	-0.003	0.0009	0.0004435	----+--	0.1727	-0.0019	0.0021	0.3751	-+-	0.2548	-0.0023	0.0018	0.2184	-+--	0.4174	-0.0025	0.0013	0.06918	--	0.01325
cg06139836	-0.0007	0.0002	0.00033	chr10	------+---	0.2503	131762961	-0.0007	0.0002	0.0004726	----+--	0.1557	-0.0005	0.0006	0.3888	---	0.3717	-0.0008	0.0004	0.06178	----	0.5063	-0.0007	0.0002	0.004103	--	0.9053
cg08170950	-0.0009	0.0002	0.0003308	chr15	---?-----+	0.4651	25324124	-0.0009	0.0003	0.000619	-?----+	0.2153	-0.0006	0.0005	0.2367	---	0.8276	-0.0012	0.0004	0.004712	----	0.4461	-0.0006	0.0003	0.0728	-+	0.1062
cg23434459	0.0005	0.0001	0.0003331	chr7	+++-++-+++	0.3566	107220583	0.0005	0.0002	0.003235	+-++-++	0.1872	0.0008	0.0004	0.02461	+++	0.8547	0.0008	0.0003	0.001478	++++	0.9549	0.0005	0.0002	0.01173	++	0.7074
cg03990847	0.0008	0.0002	0.0003339	chr1	++-++-++++	0.05564	171711503	0.0007	0.0003	0.005006	-++-+++	0.01837	0.0014	0.0006	0.01299	+++	0.927	0.0015	0.0004	0.0004662	++++	0.9609	0.0002	0.0004	0.6756	-+	0.0151
cg04613057	0.0007	0.0002	0.0003361	chr19	-+++?-+-++	0.5151	17302087	0.0008	0.0002	0.000381	++?-+-+	0.2766	0.0004	0.0007	0.4985	-++	0.7187	-0.0002	0.0005	0.7514	-+-+	0.4471	0.001	0.0002	5.767e-05	++	0.9814
cg08453281	0.0005	0.0002	0.0003367	chr3	-+++++++++	0.1352	50396971	0.0005	0.0002	0.002027	+++++++	0.09138	0.0006	0.0003	0.06707	-++	0.2562	0.0006	0.0003	0.043	-+++	0.4362	0.0005	0.0002	0.027	++	0.002526
cg24411972	0.0027	0.0008	0.0003367	chr10	+++++++++-	0.5632	134754396	0.0025	0.0008	0.002141	++++++-	0.5104	0.0055	0.0025	0.02986	+++	0.5595	0.005	0.0019	0.01004	++++	0.7411	0.0012	0.0013	0.3547	+-	0.8738
cg24744430	-0.0008	0.0002	0.0003397	chr6	?-----+---	0.8006	146864390	-0.0008	0.0002	0.001347	----+--	0.7532	-0.0018	0.0009	0.05404	?--	0.9372	-0.001	0.0006	0.09483	?---	0.5273	-0.0009	0.0003	0.003027	--	0.1725
cg02608292	0.001	0.0003	0.0003398	chr19	++++++++++	0.8788	55897501	0.0008	0.0003	0.004607	+++++++	0.844	0.0015	0.0006	0.01795	+++	0.6206	0.0015	0.0005	0.00164	++++	0.808	0.0009	0.0005	0.08805	++	0.7596
cg26068215	0.0018	0.0005	0.00034	chr3	+-++++-+++	0.5727	55050430	0.0019	0.0005	0.0003796	++++-++	0.7925	0.0011	0.0016	0.4935	+-+	0.1206	0.0021	0.0011	0.04724	+-++	0.1702	0.0019	0.0008	0.0167	++	0.2327
cg22448090	-0.0016	0.0004	0.0003409	chr1	-+----+---	0.8669	200978598	-0.0017	0.0005	0.0005959	----+--	0.8483	-0.0013	0.0012	0.2903	-+-	0.3949	-0.0013	0.001	0.1745	-+--	0.602	-0.0016	0.0006	0.01146	--	0.7368
cg06335867	-0.0032	0.0009	0.0003511	chr7	-+--------	0.8011	8482325	-0.0035	0.001	0.0003179	-------	0.6972	-0.0015	0.0026	0.5608	-+-	0.6077	-0.0027	0.0019	0.1665	-+--	0.6861	-0.0037	0.0017	0.02756	--	0.961
cg17006136	-0.0008	0.0002	0.0003539	chr4	----+-----	0.8549	186559412	-0.0009	0.0002	0.0004449	--+----	0.6653	-0.0005	0.0006	0.4031	---	0.8178	-0.0008	0.0004	0.04023	----	0.8847	-0.0012	0.0004	0.001397	--	0.8105
cg06297145	-0.0008	0.0002	0.0003563	chr4	----+-+---	0.04775	47917042	-0.0004	0.0002	0.1003	--+-+--	0.549	-0.0021	0.0005	5.329e-06	---	0.4881	-0.001	0.0003	0.0003135	----	0.01779	-0.0009	0.0004	0.03688	--	0.2103
cg01940855	0.0003	0.0001	0.0003566	chr12	+-++++++++	0.7516	104852355	0.0004	0.0001	0.001934	+++++++	0.8142	0.0003	0.0001	0.06124	+-+	0.2782	0.0002	0.0001	0.03718	+-++	0.4444	0.0008	0.0004	0.06033	++	0.9827
cg11754382	0.0018	0.0005	0.0003575	chr2	+++++-+-+?	0.7067	223901462	0.0015	0.0005	0.005019	+++-+-?	0.7162	0.0034	0.0013	0.01016	+++	0.6587	0.0021	0.0011	0.05661	++-+	0.2664	0.0015	0.0007	0.05131	+?	1
cg00173405	0.0001	0	0.0003607	chr1	+++++-++++	0.8423	1335424	0.0001	0	0.002352	+++-+++	0.6329	0.0002	0.0001	0.05609	+++	0.816	0.0002	0.0001	0.003607	++++	0.9338	0.0001	0.0001	0.09446	++	0.2069
cg17254229	0.0021	0.0006	0.0003631	chr2	++++++++-+	0.6081	121336713	0.0022	0.0006	0.0004789	+++++++	0.5533	0.0014	0.0017	0.4063	++-	0.3363	0.0028	0.0013	0.02682	+++-	0.2947	0.0016	0.0009	0.05986	++	0.9328
cg23108709	0.0009	0.0003	0.0003654	chr2	+??++????-	0.916	219847136	0.0009	0.0003	0.008528	?++???-	0.7917	0.001	0.0004	0.01577	+??	1	0.001	0.0004	0.01577	+???	1	-0.0001	0.0016	0.9597	?-	1
cg07312051	-0.004	0.0011	0.0003655	chr1	---?----++	0.7536	15656086	-0.0041	0.0012	0.000705	-?----+	0.6568	-0.0032	0.0028	0.2507	--+	0.4357	-0.0025	0.0024	0.2855	---+	0.6003	-0.0055	0.0017	0.001609	-+	0.4033
cg26862691	0.0002	0.0001	0.0003669	chr16	-++-+++++-	0.7644	89753123	0.0002	0.0001	0.0007676	+-++++-	0.5836	0.0001	0.0001	0.2274	-++	0.6136	0.0002	0.0001	0.0149	-+++	0.7301	0.0002	0.0001	0.01778	+-	0.4757
cg14356440	-0.0011	0.0003	0.0003694	chr2	---+-+---+	0.5693	135050894	-0.0011	0.0004	0.002288	-+-+--+	0.2851	-0.0011	0.0006	0.06595	---	0.8833	-0.0015	0.0004	0.0002107	----	0.6759	-0.0007	0.0006	0.2027	-+	0.707
cg25301756	0.0016	0.0005	0.0003721	chr4	+++++++++-	0.9487	1804106	0.0016	0.0005	0.001197	++++++-	0.7707	0.0017	0.0011	0.1405	+++	0.9729	0.0015	0.0009	0.07855	++++	0.9929	0.002	0.0007	0.002202	+-	0.4764
cg17943995	-0.0063	0.0018	0.0003781	chr1	--+-------	0.1584	18617630	-0.0062	0.0019	0.0007923	+------	0.06511	-0.0071	0.006	0.237	---	0.5458	-0.0074	0.0047	0.1135	----	0.7488	-0.0005	0.0034	0.8907	+-	0.009469
cg26426348	0.0028	0.0008	0.0003796	chr2	-++++++++?	0.3055	96657403	0.0035	0.0009	0.0001769	++++++?	0.2948	0.0011	0.0014	0.4505	-++	0.5132	0.0014	0.0011	0.2202	-+++	0.6848	0.0077	0.0021	0.0002177	+?	1
cg24550010	-0.0025	0.0007	0.000382	chr1	----+-----	0.7277	65731107	-0.0023	0.0007	0.002081	--+----	0.4719	-0.0037	0.0019	0.05758	---	0.9618	-0.0046	0.0013	0.00047	----	0.9227	-0.0016	0.0012	0.1739	--	0.6133
cg22642485	-0.0006	0.0002	0.0003826	chr5	----++----	0.08672	139089846	-0.0005	0.0002	0.006443	--++---	0.04887	-0.0011	0.0004	0.007833	---	0.7316	-0.0007	0.0003	0.01782	----	0.4564	-0.0008	0.0003	0.002439	--	0.006224
cg22665096	0.0016	0.0004	0.0003854	chr12	++++++++++	0.8349	42102842	0.0014	0.0005	0.002291	+++++++	0.689	0.0024	0.0012	0.05034	+++	0.7573	0.0013	0.0008	0.09767	++++	0.6024	0.0015	0.0007	0.027	++	0.1011
cg14056357	-0.0003	0.0001	0.0003865	chr19	--------++	0.7403	44952665	-0.0004	0.0001	0.0001969	------+	0.8201	0	0.0003	0.9426	--+	0.4032	-0.0001	0.0002	0.4261	---+	0.5637	-0.0004	0.0001	0.001042	-+	0.4635
cg04823720	-0.0009	0.0003	0.0003903	chr7	-----+----	0.3242	95951745	-0.0007	0.0003	0.009137	---+---	0.2903	-0.0018	0.0006	0.004514	---	0.7016	-0.0013	0.0004	0.002982	----	0.5923	-0.0005	0.0004	0.2979	--	0.2679
cg24256946	0.0009	0.0003	0.0003915	chr19	+++++-++++	0.2568	796991	0.0009	0.0003	0.001415	+++-+++	0.09893	0.0009	0.0006	0.1223	+++	0.7386	0.0006	0.0005	0.1634	++++	0.7649	0.0008	0.0004	0.06046	++	0.04349
cg18031436	0.0001	0	0.0003931	chr22	+-+++-++++	0.1757	30753142	0.0001	0	0.0003805	+++-+++	0.206	0	0	0.4562	+-+	0.1622	0.0001	0	0.003894	+-++	0.09666	0.0001	0	0.01256	++	0.3454
cg19985870	-0.0031	0.0009	0.0003935	chr19	-+-------+	0.6349	34398004	-0.0034	0.0009	0.000386	------+	0.548	-0.0016	0.0024	0.503	-+-	0.4563	-0.0032	0.002	0.113	-+--	0.3297	-0.002	0.0025	0.4304	-+	0.2488
cg04606367	-0.0016	0.0004	0.0003947	chr7	-+--?---+-	0.8739	121946213	-0.0017	0.0005	0.0002269	--?----	0.9817	-0.0002	0.0014	0.8609	-++	0.3645	-0.0008	0.0009	0.4194	-+-+	0.5145	-0.0021	0.0006	0.001254	--	0.9133
cg08950929	0.0009	0.0003	0.0003988	chr16	+++++-++++	0.1037	58768327	0.0007	0.0003	0.008883	+++-+++	0.1818	0.0017	0.0006	0.005556	+++	0.1566	0.0012	0.0004	0.007043	++++	0.1642	0.0004	0.0005	0.3671	++	0.04112
cg05383910	-0.0029	0.0008	0.0003994	chr7	+--------+	0.01545	37431792	-0.0027	0.0009	0.002088	------+	0.01199	-0.0039	0.0021	0.06821	+--	0.1486	-0.0053	0.0016	0.001025	+---	0.1781	-0.0001	0.0013	0.9134	-+	0.3579
cg22025854	-0.0037	0.001	0.0003997	chr19	----+-----	0.3819	54494493	-0.0038	0.0012	0.001203	--+----	0.1508	-0.0033	0.0023	0.1491	---	0.9238	-0.0042	0.002	0.03971	----	0.8619	-0.0079	0.0022	0.0002911	--	0.3653
cg05525743	-0.0004	0.0001	0.0004034	chr19	++-------+	0.7413	30716524	-0.0003	0.0001	0.002209	------+	0.6465	-0.0005	0.0003	0.06421	++-	0.4757	-0.0003	0.0002	0.0865	++--	0.5089	-0.0004	0.0001	0.01133	-+	0.7947
cg14527029	-0.0027	0.0008	0.000404	chr3	----+-----	0.3899	120401095	-0.0023	0.0008	0.005151	--+----	0.3267	-0.0048	0.0019	0.01348	---	0.5557	-0.0049	0.0015	0.001198	----	0.755	-0.002	0.0013	0.1162	--	0.5471
cg04350610	0.0004	0.0001	0.0004044	chr10	++++--++-+	0.01122	93683445	0.0004	0.0001	0.0003809	++--+++	0.01247	0.0002	0.0003	0.5033	++-	0.1038	0.0005	0.0002	0.00529	+++-	0.03912	0.0004	0.0002	0.009419	++	0.2889
cg25609954	-0.001	0.0003	0.0004068	chr4	++----+---	0.08522	3472246	0.0017	0.0006	0.002393	++-++-+	0.4522	0.0029	0.0015	0.04895	+++	0.2557	-0.0003	0.0007	0.6824	++--	0.3206	-0.0014	0.0004	6.883e-05	--	0.5241
cg04951476	0.0019	0.0005	0.0004068	chr6	++++-++-++	0.4308	3848243	-0.0011	0.0003	0.0001815	----+--	0.1033	0.0001	0.001	0.8769	++-	0.2094	0.0011	0.001	0.2369	++-+	0.1562	0.002	0.0008	0.01122	++	0.9051
cg14763874	-0.0013	0.0004	0.0004072	chr20	----------	0.7124	43753300	-0.0011	0.0004	0.01018	-------	0.8546	-0.0027	0.0009	0.00362	---	0.5827	-0.0018	0.0007	0.007977	----	0.3918	-0.001	0.0005	0.05698	--	0.5966
cg02132714	-0.0041	0.0012	0.0004077	chr17	-+-------+	0.8402	46656690	-0.004	0.0013	0.001545	------+	0.6902	-0.0046	0.0029	0.1127	-+-	0.6101	-0.0037	0.0023	0.1062	-+--	0.7378	-0.0035	0.002	0.07788	-+	0.5791
cg20504007	-0.0017	0.0005	0.0004081	chr10	-+-?+-----	0.8513	49892954	-0.0018	0.0005	0.0007922	-?+----	0.7562	-0.0016	0.0014	0.2634	-+-	0.493	-0.0014	0.0009	0.1259	-+--	0.6975	-0.0018	0.0006	0.005368	--	0.2528
cg06955484	-0.0021	0.0006	0.0004082	chr1	----+-----	0.2476	47695408	-0.002	0.0006	0.001163	--+----	0.08694	-0.0027	0.0019	0.1519	---	0.8726	-0.0016	0.0014	0.2409	----	0.8049	-0.0031	0.0009	0.0004526	--	0.6317
cg26436829	0.0005	0.0001	0.00041	chr16	+-+++++++-	0.5586	86588937	0.0005	0.0002	0.002038	++++++-	0.5258	0.0007	0.0004	0.07301	+-+	0.3051	0.001	0.0003	0.00203	+-++	0.2818	0.0004	0.0002	0.02682	+-	0.6751
cg16960112	0.0007	0.0002	0.0004103	chr11	--++-++++-	0.4391	64819126	0.0008	0.0002	0.0002616	++-+++-	0.5063	0.0002	0.0006	0.7405	--+	0.2552	0.0003	0.0004	0.3845	--++	0.4201	0.0009	0.0003	0.0006923	+-	0.572
cg14395298	0.0116	0.0033	0.0004111	chr13	++++++++++	0.3826	23412250	0.0094	0.0037	0.01081	+++++++	0.84	0.0198	0.0072	0.005666	+++	0.07426	0.0165	0.0058	0.00481	++++	0.1191	0.0036	0.0075	0.6307	++	0.6217
cg01778842	-0.0011	0.0003	0.0004152	chr4	----?+--++	0.3361	39482398	-0.0013	0.0003	0.0002178	--?+--+	0.2461	-0.0003	0.0008	0.7263	--+	0.5857	-0.0007	0.0006	0.1948	---+	0.6359	-0.0014	0.0004	0.001721	-+	0.03655
cg07717083	0.0025	0.0007	0.0004171	chr6	+-++-+++++	0.4736	32051857	0.0026	0.0008	0.0009065	++-++++	0.6319	0.0023	0.0019	0.227	+-+	0.1184	0.0031	0.0014	0.02642	+-++	0.1978	0.0031	0.0012	0.01293	++	0.5423
cg04151469	-0.0008	0.0002	0.0004175	chr7	-+--?-----	0.4934	101901764	-0.0008	0.0003	0.0007212	--?----	0.2496	-0.0006	0.0006	0.2822	-+-	0.7267	-0.0013	0.0004	0.002155	-+--	0.2011	-0.0006	0.0003	0.0601	--	0.8896
cg10513595	-0.0034	0.001	0.0004182	chr5	?--------+	0.7176	89311473	-0.0027	0.0011	0.01434	------+	0.7066	-0.0055	0.002	0.004582	?--	0.9367	-0.0044	0.0013	0.0007519	?---	0.7389	-0.0001	0.0024	0.9767	-+	0.9873
cg18786718	0.0024	0.0007	0.0004196	chr16	+++++-+-+-	0.181	2868001	0.0026	0.0008	0.0005159	+++-+--	0.07663	0.0015	0.0018	0.4001	+++	0.643	0.0002	0.0016	0.895	++-+	0.3632	0.0025	0.001	0.01141	+-	0.6553
cg20631270	-0.0005	0.0001	0.0004197	chr6	++-??-----	0.3532	24437470	-0.0006	0.0002	0.0001879	-??----	0.2724	-0.0001	0.0004	0.8644	++-	0.5805	-0.0005	0.0002	0.06859	++--	0.4375	-0.0003	0.0002	0.1338	--	0.7876
cg19224164	-0.002	0.0006	0.0004218	chr4	----------	0.2986	2966384	-0.0017	0.0006	0.003766	-------	0.7927	-0.0035	0.0015	0.02321	---	0.04006	-0.0026	0.001	0.009158	----	0.07143	-0.0013	0.001	0.1981	--	0.8462
cg15241582	0.0033	0.0009	0.000422	chr11	+??++?????	0.494	89323227	0.0029	0.001	0.002535	?++????	0.8452	0.0068	0.0031	0.03034	+??	1	0.0068	0.0031	0.03034	+???	1	NA	NA	NA	NA	NA
cg00021256	-0.0006	0.0002	0.0004246	chr2	-+--+----+	0.2822	219848373	-0.0007	0.0002	0.0002438	--+---+	0.268	-0.0002	0.0004	0.6418	-+-	0.3608	-0.0006	0.0003	0.02875	-+--	0.2564	-0.0006	0.0003	0.02614	-+	0.2415
cg19522940	-0.0016	0.0004	0.0004252	chr4	----+---+-	0.3376	95264373	-0.0018	0.0005	0.0002425	--+----	0.186	-0.0004	0.0012	0.7705	--+	0.8875	-0.0006	0.0009	0.466	---+	0.9517	-0.0018	0.0007	0.00559	--	0.177
cg14320593	0.0004	0.0001	0.0004315	chr18	++++-+++++	0.199	47088343	0.0004	0.0001	0.001102	++-++++	0.09901	0.0005	0.0003	0.1834	+++	0.4581	0.0008	0.0003	0.001758	++++	0.309	0.0004	0.0002	0.0134	++	0.734
cg16754643	-0.0038	0.0011	0.0004318	chr12	?????----?	0.8818	133518353	0.0007	0.0002	0.001334	+++++++	0.7996	0.0007	0.0005	0.1474	+++	0.9173	-0.0038	0.0012	0.002166	??--	0.973	NA	NA	NA	NA	NA
cg02509370	0.0007	0.0002	0.0004318	chr12	++++++++++	0.9535	49932779	-0.0038	0.0013	0.003975	???---?	0.7183	-0.0037	0.0018	0.043	??-	1	0.0004	0.0003	0.194	++++	0.862	0.0009	0.0003	0.006284	++	0.5827
cg06057045	0.0004	0.0001	0.0004327	chr2	+++++--+++	0.07182	233562093	0.0004	0.0001	0.001635	+++--++	0.1228	0.0007	0.0004	0.07554	+++	0.08069	0.0011	0.0003	0.0005241	++++	0.08626	0.0003	0.0001	0.02432	++	0.9899
cg08792703	-0.0024	0.0007	0.0004352	chr11	-+---+---+	0.2992	60779666	-0.0029	0.0007	6.946e-05	---+--+	0.506	0.0005	0.0017	0.7586	-+-	0.4021	-0.0015	0.0014	0.2795	-+--	0.1075	-0.0033	0.001	0.001424	-+	0.6799
cg20655369	0.0024	0.0007	0.000436	chr15	+-+++++++-	0.4368	89924975	0.0026	0.0007	0.0004541	++++++-	0.477	0.0013	0.0019	0.4811	+-+	0.2179	0.0014	0.0013	0.3039	+-++	0.3841	0.0027	0.0011	0.0113	+-	0.5833
cg17858364	0.0006	0.0002	0.0004385	chr1	+++++-++++	0.4581	93811570	0.0006	0.0002	0.002248	+++-+++	0.2739	0.001	0.0005	0.05803	+++	0.7149	0.0012	0.0004	0.00132	++++	0.7334	0.0005	0.0002	0.03995	++	0.623
cg18297349	-0.0021	0.0006	0.0004387	chr5	-----+----	0.7117	138726375	-0.0018	0.0007	0.005831	---+---	0.6607	-0.0039	0.0015	0.01222	---	0.7263	-0.004	0.0013	0.001692	----	0.8856	-0.0022	0.0009	0.0186	--	0.6887
cg21461837	0.0007	0.0002	0.0004388	chr19	++?+++++++	0.569	10947101	0.0004	0.0002	0.0572	?++++++	0.981	0.0014	0.0004	0.0002199	+++	0.5894	0.001	0.0003	0.0004664	++++	0.3064	0	0.0011	0.9731	?+	1
cg26649096	0.0034	0.001	0.0004439	chr2	+++++-+++-	0.7634	12454131	0.0028	0.001	0.008367	+++-++-	0.9122	0.0071	0.0025	0.004916	+++	0.5607	0.0048	0.002	0.01851	++++	0.3149	0.0039	0.0019	0.04568	+-	0.4335
cg01417543	0.0002	0.0001	0.0004444	chr13	++++-++-++	0.2532	41885657	0.0002	0.0001	0.00149	++-++-+	0.1415	0.0002	0.0001	0.134	+++	0.4238	0.0001	0.0001	0.4034	++-+	0.3202	0.0004	0.0001	5.75e-05	++	0.2599
cg16852483	0.0035	0.001	0.0004445	chr13	++++++++++	0.8913	102103930	0.003	0.0011	0.005784	+++++++	0.8917	0.0067	0.0026	0.01155	+++	0.8414	0.0061	0.0021	0.004121	++++	0.9278	0.0018	0.0017	0.2954	++	0.8729
cg27365342	-0.0024	0.0007	0.000445	chr6	-+------+-	0.4204	12881417	-0.0028	0.0007	0.000103	-------	0.7189	0.0013	0.0022	0.568	-++	0.2976	-0.0013	0.0017	0.4431	-+-+	0.1475	-0.0025	0.0012	0.0281	--	0.1153
cg23508607	0.0007	0.0002	0.0004463	chr20	+++++-++++	0.9277	44651368	0.0005	0.0002	0.01429	+++-+++	0.948	0.0011	0.0004	0.004719	+++	0.8113	0.001	0.0003	0.0009053	++++	0.8777	0.0005	0.0004	0.1578	++	0.7847
cg25401140	0.0001	0	0.0004472	chr17	+-++++-+++	0.8648	37558857	0.0001	0	0.0007635	++++-++	0.7244	0.0001	0.0001	0.3103	+-+	0.6198	0.0001	0.0001	0.08337	+-++	0.7819	0.0001	0	0.01196	++	0.8113
cg06000951	-0.0009	0.0003	0.0004474	chr6	?---+----+	0.6103	39902288	-0.0009	0.0003	0.000992	--+---+	0.3888	-0.0009	0.0007	0.2237	?--	0.9033	-0.0008	0.0005	0.08474	?---	0.9797	-0.0013	0.0004	0.00144	-+	0.521
cg18815539	-0.0003	0.0001	0.0004483	chr4	++-------+	0.6209	25162020	-0.0003	0.0001	0.001232	------+	0.96	-0.0003	0.0002	0.1665	++-	0.05998	-0.0003	0.0001	0.06877	++--	0.13	-0.0002	0.0001	0.0148	-+	0.4133
cg26824847	0.0059	0.0017	0.0004485	chr11	-+++++++++	0.4389	132728088	0.0056	0.0018	0.001826	+++++++	0.5261	0.0074	0.0045	0.09825	-++	0.1563	0.01	0.004	0.0139	-+++	0.1344	0.0028	0.0041	0.5023	++	0.5806
cg06694734	-0.0004	0.0001	0.000449	chr4	----+-----	0.7542	4871166	-0.0004	0.0001	0.001721	--+----	0.4836	-0.0004	0.0003	0.1137	---	0.8347	-0.0003	0.0002	0.1188	----	0.8114	-0.0006	0.0002	0.001271	--	0.5657
cg20327820	-0.0002	0	0.0004495	chr4	-+----++--	0.0897	78979807	-0.0002	0	0.001071	----++-	0.03051	-0.0002	0.0002	0.1868	-+-	0.6083	-0.0001	0.0001	0.4494	-++-	0.5318	-0.0001	0.0001	0.006655	--	0.6251
cg25653011	0.0005	0.0001	0.0004501	chr17	-++++-+++-	0.1129	38296442	0.0005	0.0001	0.0004853	+++-++-	0.3597	0.0003	0.0003	0.4561	-++	0.0265	0.0004	0.0003	0.1357	-+++	0.05483	0.0004	0.0002	0.01593	+-	0.0277
cg14550422	0.0004	0.0001	0.0004511	chr18	+++-?-+++-	0.07265	46066011	0.0004	0.0001	0.002276	+-?-++-	0.02325	0.0004	0.0002	0.08282	+++	0.5116	0.0003	0.0002	0.0587	++++	0.6535	0.0003	0.0002	0.06272	+-	0.1502
cg26185508	0.0018	0.0005	0.0004538	chr1	++++?-++++	0.6337	54619445	0.0018	0.0006	0.001451	++?-+++	0.4082	0.0021	0.0014	0.1374	+++	0.6041	0.0027	0.001	0.008889	++++	0.7076	0.002	0.0008	0.008709	++	0.9275
cg11825621	-0.0032	0.0009	0.0004551	chr10	+??--????-	0.3224	28034792	-0.0034	0.0009	0.00027	?--???-	0.2915	0.0009	0.0042	0.8322	+??	1	0.0009	0.0042	0.8322	+???	1	-0.0037	0.0089	0.6792	?-	1
cg13342441	0.0003	0.0001	0.0004552	chr19	++++---+++	0.08981	41857250	0.0003	0.0001	0.005932	++---++	0.2775	0.0011	0.0003	0.001072	+++	0.4567	0.0007	0.0003	0.005255	++++	0.1943	0.0003	0.0001	0.001005	++	0.6486
cg20984991	-0.0006	0.0002	0.000463	chr6	---+------	0.6755	159421515	-0.0005	0.0002	0.003434	-+-----	0.4364	-0.0008	0.0004	0.04609	---	0.7917	-0.001	0.0003	0.0003707	----	0.7682	-0.0004	0.0003	0.07536	--	0.2016
cg20653375	0.0013	0.0004	0.0004632	chr13	-++++++---	0.2821	99100778	0.0014	0.0004	0.000567	+++++--	0.1037	0.0012	0.0019	0.5345	-+-	0.835	0.0005	0.0018	0.7747	-+--	0.5848	0.0009	0.0005	0.04885	+-	0.4279
cg00349895	-0.0013	0.0004	0.0004634	chr4	-+-+------	0.1231	154073501	-0.0014	0.0004	0.0008579	-+-----	0.0745	-0.0009	0.0007	0.222	-+-	0.3419	-0.001	0.0006	0.07211	-+--	0.5256	-0.0013	0.0007	0.07583	--	0.8416
cg20139425	0.0004	0.0001	0.0004637	chr17	--++++++++	0.9249	43212881	0.0004	0.0001	0.0004416	+++++++	0.9442	0.0002	0.0003	0.6082	--+	0.4233	0.0002	0.0002	0.4262	--++	0.6318	0.0004	0.0001	0.002069	++	0.725
cg01869067	0.0007	0.0002	0.0004668	chr22	-++++-++++	0.168	46374411	0.0006	0.0002	0.003189	+++-+++	0.1368	0.0014	0.0006	0.02346	-++	0.4557	0.0014	0.0005	0.003096	-+++	0.6655	0.0006	0.0002	0.01449	++	0.09437
cg03841560	0.0005	0.0002	0.0004683	chr21	+++-+-+++-	0.3986	47649172	0.0005	0.0002	0.002159	+-+-++-	0.4843	0.0008	0.0004	0.07032	+++	0.1732	0.0009	0.0003	0.006589	++++	0.3093	0.0005	0.0002	0.01523	+-	0.6061
cg09989681	0.003	0.0009	0.0004715	chr11	+++++-++--	0.4554	1892043	0.0032	0.001	0.0007623	+++-++-	0.318	0.0022	0.0021	0.2931	++-	0.4575	0.0027	0.0017	0.1109	+++-	0.6164	0.0058	0.0017	0.0005518	+-	0.09531
cg13898357	-0.0007	0.0002	0.0004719	chr9	-+--+---+-	0.1227	12775750	-0.0008	0.0002	0.0001442	--+----	0.1685	0.0002	0.0006	0.7515	-++	0.2763	0	0.0004	0.9416	-+-+	0.419	-0.0014	0.0003	3.985e-06	--	0.4346
cg18512780	-0.0055	0.0016	0.0004723	chr17	??????-???	1	76117734	-0.0055	0.0016	0.0004723	????-??	1	NA	NA	NA	NA	NA	NA	NA	NA	NA	NA	NA	NA	NA	NA	NA
cg22539744	0.0016	0.0005	0.0004741	chr3	+-++?+++++	0.6004	64476370	0.0016	0.0005	0.0008005	++?++++	0.3092	0.0013	0.0013	0.3072	+-+	0.8264	0.0011	0.0009	0.2276	+-++	0.9367	0.0016	0.0007	0.01728	++	0.121
cg15346191	0.0007	0.0002	0.0004749	chr2	+++-++-++-	0.4493	242743588	0.0005	0.0002	0.03053	+-++-+-	0.7682	0.0015	0.0004	0.0008298	+++	0.3841	0.0013	0.0004	0.0002159	++++	0.5141	0.0006	0.0003	0.07213	+-	0.4417
cg15179805	0.0006	0.0002	0.0004751	chr13	+++-+-++++	0.3257	113623659	0.0006	0.0002	0.003818	+-+-+++	0.1973	0.0012	0.0005	0.02449	+++	0.7806	0.0014	0.0004	0.0001397	++++	0.8596	0.0003	0.0003	0.3644	++	0.8749
cg07339236	-0.0019	0.0006	0.0004756	chr20	+----++---	0.8495	50312490	-0.0015	0.0006	0.01822	---++--	0.9326	-0.0031	0.0011	0.004202	+--	0.4946	-0.0025	0.0008	0.00181	+---	0.5506	-0.0014	0.0009	0.1296	--	0.4374
cg26856289	-0.007	0.002	0.0004757	chr1	-????----?	0.8587	24307516	-0.0068	0.0025	0.00558	???---?	0.5255	-0.0075	0.0035	0.03283	-?-	0.9632	-0.0072	0.0027	0.007734	-?--	0.9899	NA	NA	NA	NA	NA
cg03916912	0.0004	0.0001	0.0004767	chr11	++++?++-+-	0.5642	95522834	0.0004	0.0001	0.001788	++?++--	0.3563	0.0003	0.0002	0.103	+++	0.5996	0.0002	0.0002	0.1809	++-+	0.5938	0.0005	0.0002	0.00321	+-	0.3866
cg00296378	0.0005	0.0001	0.0004774	chr12	+++++--++-	0.6844	49177153	0.0004	0.0001	0.003179	+++--+-	0.5986	0.0009	0.0004	0.03139	+++	0.6594	0.001	0.0003	0.001698	++++	0.8345	0.0004	0.0002	0.01885	+-	0.3562
cg22524951	-0.0005	0.0001	0.0004831	chr12	-+--+----+	0.3074	91775247	-0.0005	0.0001	0.0004202	--+---+	0.1475	-0.0002	0.0004	0.6185	-+-	0.7597	-0.0005	0.0003	0.07882	-+--	0.6996	-0.0005	0.0002	0.004997	-+	0.7861
cg01769553	0.0055	0.0016	0.0004834	chr14	++++++-++-	0.5643	94148391	0.0053	0.0017	0.001527	++++-+-	0.4517	0.0071	0.0047	0.1327	+++	0.4016	0.0088	0.0041	0.03137	++++	0.5158	0.001	0.004	0.7938	+-	0.7952
cg23573900	-0.0006	0.0002	0.0004839	chr5	-+--+----+	0.529	139056794	-0.0006	0.0002	0.0004223	--+---+	0.4631	-0.0002	0.0005	0.6509	-+-	0.3794	-0.0005	0.0004	0.1804	-+--	0.4706	-0.0005	0.0002	0.009348	-+	0.1814
cg03851496	-0.0011	0.0003	0.0004846	chr1	-+-++-----	0.4644	150488805	-0.0008	0.0004	0.02366	-++----	0.7341	-0.0019	0.0006	0.002372	-+-	0.2283	-0.0014	0.0004	0.0004115	-+--	0.263	-0.0009	0.0008	0.2543	--	0.2497
cg21150901	-0.0009	0.0002	0.0004846	chr17	----+-----	0.2323	34957586	-0.0008	0.0003	0.001727	--+----	0.112	-0.001	0.0006	0.1229	---	0.5133	-0.001	0.0004	0.01091	----	0.7179	-0.0009	0.0004	0.02536	--	0.1024
cg24998357	0.0012	0.0003	0.0004876	chr7	++++?++-++	0.06758	3280646	0.001	0.0004	0.009891	++?++-+	0.03422	0.0023	0.0008	0.006215	+++	0.7515	0.0008	0.0007	0.2513	++-+	0.01732	0.0011	0.0005	0.01968	++	0.6885
cg18597940	-0.0008	0.0002	0.0004878	chr14	----++----	0.9284	76327105	-0.0008	0.0002	0.001775	--++---	0.843	-0.0016	0.0009	0.07586	---	0.8836	-0.0016	0.0007	0.03498	----	0.9693	-0.0008	0.0003	0.002937	--	0.3525
cg07911361	-0.0042	0.0012	0.0004884	chr22	++--------	0.3111	45126040	-0.0051	0.0013	0.0001201	-------	0.4149	0.0001	0.0029	0.9837	++-	0.4068	-0.0023	0.0024	0.3423	++--	0.2735	-0.0068	0.0029	0.01982	--	0.9474
cg14928764	-0.0021	0.0006	0.0004977	chr20	----+---+-	0.6099	23064608	-0.0022	0.0007	0.0005805	--+----	0.9151	-0.0013	0.0017	0.4503	--+	0.08503	-0.0021	0.0012	0.08818	---+	0.1448	-0.0025	0.0009	0.007258	--	0.7013
cg01050010	0.0119	0.0034	0.0004985	chr17	++?++++--+	0.1517	31149877	0.0127	0.0036	0.0004931	?++++-+	0.405	0.0061	0.0099	0.5387	++-	0.03877	-0.0006	0.0087	0.9441	++--	0.03448	0.0003	0.0448	0.9944	?+	1
cg18855621	0.0024	0.0007	0.0005007	chr5	+++++++++-	0.9912	38404322	0.0022	0.0007	0.002853	++++++-	0.9763	0.0033	0.0018	0.05869	+++	0.8016	0.0034	0.0015	0.02296	++++	0.9309	0.0017	0.0012	0.1523	+-	0.6485
cg21634842	0.0009	0.0002	0.0005021	chr16	+++-+-++++	0.6641	82203649	0.0008	0.0003	0.00494	+-+-+++	0.5454	0.0012	0.0006	0.02906	+++	0.5498	0.0012	0.0004	0.003961	++++	0.7534	0.0007	0.0004	0.1291	++	0.2755
cg19307406	-0.0015	0.0004	0.0005031	chr1	-----++---	0.2756	167874258	-0.0015	0.0005	0.000968	---++--	0.09339	-0.0012	0.001	0.2506	---	0.9719	-0.0022	0.0008	0.008434	----	0.4034	-0.0019	0.0006	0.00311	--	0.4406
cg22753611	-0.0029	0.0008	0.0005051	chr6	--------++	0.3148	17472892	-0.0028	0.0009	0.001169	------+	0.2341	-0.0032	0.0026	0.2089	--+	0.3042	-0.0055	0.0019	0.003284	---+	0.2529	-0.0009	0.0013	0.5203	-+	0.8995
cg16871561	-0.0051	0.0015	0.0005053	chr12	------+---	0.7821	98986887	-0.0055	0.0016	0.0004439	----+--	0.5473	-0.0023	0.004	0.5739	---	0.9811	-0.0044	0.0033	0.182	----	0.8074	-0.0067	0.0028	0.01905	--	0.9339
cg09517766	0.0077	0.0022	0.0005054	chr10	-+++?+++++	0.4463	44894102	0.0069	0.0024	0.004246	++?++++	0.7415	0.0126	0.0058	0.02901	-++	0.1169	0.011	0.005	0.02679	-+++	0.2045	0.0035	0.005	0.4857	++	0.262
cg11530213	0.0074	0.0021	0.0005067	chr8	+-++?++-++	0.5804	42037966	0.0074	0.0023	0.001448	++?++-+	0.4959	0.0072	0.0051	0.1626	+-+	0.3302	0.0045	0.0045	0.3162	+--+	0.3339	0.0126	0.0047	0.007426	++	0.8466
cg10589235	-0.0011	0.0003	0.0005097	chr13	----+-----	0.8371	107569888	-0.001	0.0003	0.004076	--+----	0.7396	-0.0021	0.0009	0.02311	---	0.9488	-0.0017	0.0006	0.004421	----	0.9386	-0.0013	0.0005	0.008662	--	0.8674
cg09139227	-0.0362	0.0104	0.0005138	chr10	?????????-	1	70091650	-0.0362	0.0104	0.0005138	??????-	1	NA	NA	NA	NA	NA	NA	NA	NA	NA	NA	-0.0362	0.0104	0.0005138	?-	1
cg17287155	-0.0018	0.0005	0.0005141	chr5	+---?-----	0.06218	393347	-0.0018	0.0006	0.003306	--?----	0.1731	-0.002	0.0011	0.06199	+--	0.02887	-0.0021	0.0009	0.01567	+---	0.06891	-0.0016	0.0008	0.05405	--	0.09702
cg19551589	-0.0008	0.0002	0.0005165	chr20	+---+--??-	0.7919	62579792	-0.0008	0.0002	0.0004926	--+--?-	0.6207	0.0002	0.0033	0.9492	+-?	0.594	0.0002	0.0033	0.9492	+-??	0.594	-0.0009	0.0002	0.0003208	--	0.6298
cg05858607	-0.0003	0.0001	0.0005168	chr10	+---?-++-+	0.4436	128593624	-0.0004	0.0001	0.0004165	--?-+++	0.1979	-0.0001	0.0004	0.796	+--	0.9476	-0.0001	0.0003	0.8504	+-+-	0.9868	-0.0004	0.0001	0.001163	-+	0.05857
cg14030346	0.0012	0.0003	0.0005177	chr11	++++++++++	0.7974	115372975	0.0012	0.0004	0.001543	+++++++	0.7569	0.0012	0.0008	0.1547	+++	0.3668	0.0011	0.0006	0.09366	++++	0.5618	0.0009	0.0006	0.1429	++	0.5837
cg23516425	0.0009	0.0002	0.000519	chr2	+++++++++-	0.9242	20186047	0.0007	0.0003	0.009855	++++++-	0.923	0.0014	0.0006	0.009479	+++	0.7827	0.0009	0.0004	0.01307	++++	0.5699	0.0007	0.0004	0.07501	+-	0.2852
cg14219677	-0.0005	0.0002	0.0005197	chr9	----------	0.9207	130649009	-0.0005	0.0002	0.001956	-------	0.7912	-0.0007	0.0004	0.1077	---	0.7476	-0.0004	0.0003	0.148	----	0.7468	-0.0005	0.0002	0.009386	--	0.1583
cg18919017	-0.0015	0.0004	0.0005208	chr5	-+--?+---+	0.9618	146796877	-0.0016	0.0005	0.0008289	--?+--+	0.9066	-0.001	0.0009	0.2565	-+-	0.7708	-0.0012	0.0007	0.0783	-+--	0.8773	-0.0017	0.0007	0.01142	-+	0.3216
cg01466967	0.0007	0.0002	0.0005209	chr5	-++++-++++	0.06301	59995837	0.0008	0.0002	0.00115	+++-+++	0.01735	0.0007	0.0005	0.2221	-++	0.6813	0.0005	0.0004	0.2216	-+++	0.8103	0.0009	0.0003	0.003658	++	0.0005366
cg25318579	-0.0021	0.0006	0.0005222	chr3	---?-----+	0.6944	187672350	-0.0018	0.0007	0.007962	-?----+	0.676	-0.0033	0.0013	0.0143	---	0.493	-0.0032	0.0011	0.002532	----	0.6994	-0.0014	0.0008	0.09902	-+	0.1338
cg24427243	0.0031	0.0009	0.0005227	chr1	++++++++-+	0.7658	12128100	0.0032	0.0009	0.0005643	+++++++	0.6136	0.0018	0.003	0.5586	++-	0.5856	0.0039	0.0023	0.08679	+++-	0.5426	0.0036	0.0014	0.009471	++	0.3585
cg24675735	-0.0014	0.0004	0.0005246	chr17	------+--+	0.181	74878351	-0.0011	0.0004	0.008056	----+-+	0.35	-0.0037	0.0013	0.002962	---	0.3517	-0.0025	0.0009	0.009433	----	0.2141	-0.0016	0.0006	0.005151	-+	0.05291
cg10577257	0.0043	0.0013	0.0005282	chr12	--+++++++-	0.5994	130929193	0.005	0.0013	0.0001808	++++++-	0.8101	-0.0007	0.0038	0.8464	--+	0.3123	-0.0005	0.0035	0.8925	--++	0.5009	0.0039	0.0025	0.1214	+-	0.3398
cg24304848	-0.0028	0.0008	0.0005286	chr11	----?-----	0.1926	44764716	-0.0026	0.0008	0.001734	--?----	0.09346	-0.0058	0.0033	0.081	---	0.6379	-0.0061	0.0022	0.004577	----	0.8211	-0.0028	0.0012	0.01968	--	0.6
cg05762671	0.0023	0.0007	0.0005299	chr16	+-++-+++++	0.5756	67345737	0.0024	0.0007	0.0007658	++-++++	0.6694	0.0017	0.0019	0.3699	+-+	0.1808	0.0017	0.0015	0.2452	+-++	0.331	0.0031	0.001	0.002544	++	0.2884
cg12368280	0.0012	0.0004	0.0005312	chr3	+-++++++++	0.969	123747733	0.0012	0.0004	0.001391	+++++++	0.976	0.0011	0.0009	0.1807	+-+	0.4383	0.001	0.0006	0.1026	+-++	0.6338	0.0015	0.0006	0.008025	++	0.5731
cg20467658	0.0042	0.0012	0.0005339	chr15	+-+++++++-	0.2793	89933347	0.0041	0.0013	0.001159	++++++-	0.3851	0.0052	0.0043	0.2204	+-+	0.1036	0.0083	0.0034	0.013	+-++	0.1162	0.0043	0.0022	0.0486	+-	0.6596
cg16564525	-0.0042	0.0012	0.0005353	chr1	----------	0.6036	156561143	-0.0042	0.0013	0.001056	-------	0.3175	-0.0043	0.0038	0.2613	---	0.8666	-0.005	0.0032	0.1151	----	0.9429	-0.0056	0.0028	0.05005	--	0.7102
cg01739725	-0.0018	0.0005	0.0005372	chr14	------+-+-	0.964	38071393	-0.002	0.0005	0.0002436	----+--	0.9595	0	0.0016	0.9918	--+	0.9852	-0.0011	0.0011	0.3426	---+	0.7863	-0.0024	0.0009	0.007362	--	0.7371
cg09098545	0.0022	0.0006	0.0005374	chr4	+-++--++-+	0.3977	97914176	0.0025	0.0007	0.0001819	++--+++	0.3926	-0.0001	0.0017	0.9702	+--	0.5681	0.0002	0.0013	0.894	+-+-	0.7575	0.0029	0.001	0.002686	++	0.9313
cg07992500	-0.0062	0.0018	0.0005386	chr2	-----+-+--	0.4246	37896583	-0.0053	0.0019	0.004782	---+-+-	0.4233	-0.0127	0.0053	0.01681	---	0.4866	-0.0078	0.0045	0.08281	--+-	0.2138	-0.011	0.0037	0.002805	--	0.7852
cg14913610	0.0036	0.001	0.000542	chr12	++++++++-+	0.7558	9142341	0.0036	0.0011	0.001521	+++++++	0.6249	0.0032	0.0023	0.1642	++-	0.4883	0.0042	0.0019	0.03075	+++-	0.5896	0.0032	0.0019	0.1002	++	0.8727
cg08754088	0.0035	0.001	0.0005427	chr8	++++++++++	0.1779	35501934	0.0036	0.0011	0.0009826	+++++++	0.05724	0.0029	0.0027	0.2805	+++	0.8217	0.0034	0.0023	0.1339	++++	0.9134	0.0019	0.002	0.3649	++	0.04464
cg04661457	-0.0049	0.0014	0.0005445	chr12	???--?----	0.4291	92531553	-0.0057	0.0016	0.0002764	?--?---	0.4826	-0.0013	0.0033	0.692	??-	1	-0.0017	0.0022	0.4458	??--	0.8932	-0.0109	0.0193	0.5713	?-	1
cg27589594	-0.0025	0.0007	0.0005476	chr17	+---------	0.2431	18871182	-0.0029	0.0008	0.0001529	-------	0.2812	0.0005	0.002	0.8108	+--	0.449	-0.0009	0.0017	0.5745	+---	0.3629	-0.0014	0.0014	0.3181	--	0.06436
cg07197864	0.0007	0.0002	0.000548	chr1	+++++-++++	0.04273	32110446	0.0006	0.0002	0.01053	+++-+++	0.04134	0.0019	0.0006	0.002049	+++	0.9075	0.0017	0.0005	0.000235	++++	0.9416	0.0003	0.0003	0.3618	++	0.0137
cg19197905	-0.0019	0.0005	0.0005482	chr10	?+?--+----	0.5135	98716488	-0.002	0.0005	0.0002572	?--+---	0.7078	0.0031	0.0033	0.3472	?+-	0.3224	0.0005	0.0028	0.8642	?+--	0.221	-0.002	0.0013	0.1344	?-	1
cg15674825	-0.0023	0.0007	0.0005497	chr5	-+--?-----	0.8727	150052349	-0.0024	0.0007	0.001146	--?----	0.7839	-0.0019	0.0016	0.2289	-+-	0.525	-0.0023	0.0012	0.04953	-+--	0.695	-0.0027	0.0012	0.01944	--	0.6786
cg15937958	-0.0022	0.0006	0.0005503	chr19	++---+---?	0.3218	42947133	-0.0024	0.0007	0.0003814	---+--?	0.1928	-0.0004	0.0023	0.8631	++-	0.5659	-0.0034	0.0018	0.05532	++--	0.132	-0.0029	0.001	0.004782	-?	1
cg07027513	-0.0006	0.0002	0.0005618	chr18	-----++---	0.4554	29265840	-0.0006	0.0002	0.003404	---++--	0.4472	-0.0009	0.0005	0.055	---	0.265	-0.0009	0.0003	0.001043	----	0.4436	-0.0005	0.0003	0.05895	--	0.1066
cg25865108	-0.0047	0.0014	0.0005662	chr6	+-----+--+	0.6548	45559104	0.0002	0.0001	0.01965	?-+--+-	0.02264	0.0002	0.0001	0.008866	--+	0.7683	-0.0035	0.0035	0.3086	+---	0.7439	-0.0055	0.0028	0.04756	-+	0.5964
cg00980293	0.0002	0.0001	0.0005662	chr6	--?-+--++-	0.08136	17987232	-0.0051	0.0015	0.0004621	----+-+	0.4476	-0.0018	0.004	0.6458	+--	0.797	0.0002	0.0001	2.057e-05	--++	0.8943	-0.0004	0.0008	0.6371	?-	1
cg10617909	-0.0016	0.0005	0.0005669	chr5	----?--+++	0.3793	180527697	-0.0017	0.0005	0.0006199	--?--++	0.186	-0.001	0.0016	0.5536	--+	0.6405	-0.0003	0.0013	0.8459	--++	0.7026	-0.0014	0.0006	0.02509	-+	0.5556
cg23752007	-0.003	0.0009	0.0005679	chr7	-+---++--+	0.01103	37429500	-0.0031	0.0009	0.0006789	---++-+	0.00955	-0.0022	0.0035	0.5302	-+-	0.1108	-0.007	0.0022	0.001782	-+--	0.05354	-0.0019	0.0014	0.1807	-+	0.1539
cg23045373	0.0005	0.0002	0.000571	chr8	+???-?+??+	0.8384	11324048	0.0006	0.0003	0.02388	??-?+?+	0.6605	0.0005	0.0002	0.009209	+??	1	0.0005	0.0002	0.009209	+???	1	0.0004	0.0011	0.7046	?+	1
cg00652264	0.0007	0.0002	0.000572	chr14	+++++-++++	0.5152	53619311	0.0007	0.0002	0.002269	+++-+++	0.2337	0.0009	0.0005	0.1031	+++	0.9904	0.0008	0.0004	0.03921	++++	0.9972	0.0009	0.0003	0.00602	++	0.0163
cg18058813	0.0002	0.0001	0.0005739	chr6	+++++-++++	0.7408	105307561	0.0002	0.0001	0.0254	+++-+++	0.7987	0.0004	0.0001	0.002218	+++	0.8135	0.0003	0.0001	0.004473	++++	0.5825	0.0002	0.0001	0.1192	++	0.3512
cg17884766	0.0014	0.0004	0.0005748	chr12	++++++++++	0.7822	50641260	0.0012	0.0004	0.003505	+++++++	0.6822	0.0025	0.0012	0.03805	+++	0.7266	0.0019	0.0008	0.01903	++++	0.7693	0.001	0.0005	0.05686	++	0.133
cg17775713	-0.0026	0.0007	0.0005763	chr3	++-------+	0.382	133465469	-0.0028	0.0008	0.0004691	------+	0.659	-0.001	0.002	0.6088	++-	0.08874	-0.0017	0.0018	0.3459	++--	0.1582	-0.0036	0.0021	0.09691	-+	0.6803
cg05549611	0.001	0.0003	0.000577	chr21	++++--++++	0.1257	40146046	0.001	0.0003	0.000882	++--+++	0.05265	0.0007	0.0007	0.3375	+++	0.5157	0.0016	0.0006	0.003064	++++	0.1968	0.0005	0.0004	0.1551	++	0.4258
cg09588360	0.0004	0.0001	0.0005773	chr2	-++-+-+++?	0.5281	54785795	0.0004	0.0001	0.001267	+-+-++?	0.6247	0.0004	0.0003	0.2273	-++	0.1663	0.0005	0.0002	0.01816	-+++	0.2446	0.0003	0.0001	0.01851	+?	1
cg15096085	-0.0025	0.0007	0.0005788	chr15	----------	0.9543	90455635	-0.0025	0.0008	0.001382	-------	0.8391	-0.0031	0.0024	0.1952	---	0.8116	-0.0034	0.0018	0.06627	----	0.9304	-0.0028	0.0013	0.03136	--	0.209
cg08832054	-0.0009	0.0003	0.0005803	chr16	+--+-++---	0.002384	2944644	-0.0009	0.0003	0.001478	-+-++--	0.0004071	-0.0017	0.0011	0.1336	+--	0.7845	-0.0015	0.0009	0.07258	+---	0.9094	-0.0012	0.0003	8.97e-05	--	9.08e-05
cg06616710	-0.0015	0.0004	0.0005812	chr10	----+----+	0.5998	99473224	-0.0015	0.0004	0.001007	--+---+	0.3155	-0.0015	0.0015	0.3123	---	0.8608	-0.0013	0.001	0.2035	----	0.9515	-0.0024	0.0007	0.000678	-+	0.7485
cg23922718	-0.0009	0.0003	0.0005831	chr17	----+-+---	0.7869	45332022	-0.0009	0.0003	0.001447	--+-+--	0.5036	-0.0008	0.0006	0.1892	---	0.9224	-0.0009	0.0004	0.03118	----	0.9653	-0.0013	0.0004	0.004186	--	0.7265
cg10299214	0.0005	0.0001	0.0005854	chr4	++++-+++++	0.9053	186000492	0.0005	0.0001	0.0006232	++-++++	0.7544	0.0003	0.0005	0.598	+++	0.7756	0.0005	0.0004	0.2257	++++	0.8295	0.0005	0.0002	0.005356	++	0.6889
cg01996343	0.0015	0.0004	0.0005868	chr3	+++++++++-	0.4469	141455371	0.001	0.0005	0.02244	++++++-	0.9529	0.0044	0.0012	0.000258	+++	0.7582	0.003	0.0008	0.0004353	++++	0.3465	0.0009	0.0006	0.1375	+-	0.3017
cg00320243	0.0007	0.0002	0.000588	chr19	+++++-++++	0.03676	18314691	0.0005	0.0002	0.01353	+++-+++	0.0374	0.0012	0.0005	0.005605	+++	0.2823	0.0009	0.0003	0.003636	++++	0.3178	0.0002	0.0003	0.6592	++	0.3948
cg26899718	-0.0019	0.0005	0.0005903	chr16	-----++---	0.5378	68404797	-0.0018	0.0006	0.001671	---++--	0.3462	-0.0022	0.0015	0.1601	---	0.5531	-0.0028	0.0012	0.0243	----	0.6629	-0.0022	0.0008	0.005631	--	0.06777
cg01915895	0.0007	0.0002	0.0005915	chr4	+-+++--+++	0.1419	15656832	0.0007	0.0002	0.0008976	+++--++	0.04905	0.0006	0.0007	0.3737	+-+	0.6626	0.0011	0.0004	0.00891	+-++	0.5855	0.0009	0.0003	0.001114	++	0.1006
cg24647015	0.0102	0.003	0.0005916	chr11	?--+++++++	0.3974	114191367	0.0118	0.0033	0.0003575	-++++++	0.4436	0.0036	0.0067	0.596	?-+	0.2475	0.0071	0.0061	0.2458	?-++	0.2338	0.0011	0.0068	0.8732	-+	0.2213
cg14276584	-0.0033	0.001	0.0005944	chr9	----+-----	0.6861	99318213	-0.0028	0.001	0.006404	--+----	0.6317	-0.0066	0.0027	0.0136	---	0.792	-0.0064	0.002	0.001359	----	0.9239	-0.0017	0.0016	0.2931	--	0.3084
cg18118535	0.0011	0.0003	0.0006012	chr5	++++-+++++	0.1177	13943415	0.0012	0.0004	0.001213	++-++++	0.03094	0.001	0.0009	0.2501	+++	0.8934	0.002	0.0007	0.004983	++++	0.2939	0.0005	0.0005	0.3225	++	0.7415
cg10374499	-0.0021	0.0006	0.0006021	chr11	-+---++---	0.1003	44601397	-0.0018	0.0007	0.006882	---++--	0.2029	-0.0044	0.0017	0.01099	-+-	0.125	-0.0053	0.0015	0.0002374	-+--	0.167	-0.0015	0.001	0.1242	--	0.8261
cg13666041	-0.003	0.0009	0.0006035	chr14	-+-?+----+	0.703	69442697	-0.0031	0.0009	0.001236	-?+---+	0.6185	-0.0025	0.0021	0.2378	-+-	0.386	-0.0032	0.0018	0.07119	-+--	0.516	-0.0037	0.0012	0.00259	-+	0.3841
cg26246947	-0.0023	0.0007	0.0006084	chr1	-+--------	0.5893	45191110	-0.0026	0.0007	0.0004179	-------	0.5835	-0.0008	0.0017	0.659	-+-	0.3925	-0.0026	0.0015	0.08679	-+--	0.1074	-0.0017	0.0012	0.1454	--	0.9574
cg17362109	0.0005	0.0001	0.0006096	chr3	-++--+-+++	0.2002	194981274	0.0004	0.0002	0.004505	+--+-++	0.3928	0.0011	0.0005	0.02115	-++	0.1151	0.0007	0.0003	0.03388	-+++	0.1358	0.0006	0.0002	0.0004384	++	0.3251
cg19220719	-0.0025	0.0007	0.0006096	chr10	-+------+-	0.4235	77532329	-0.0029	0.0008	0.0002202	-------	0.6032	0.0003	0.0021	0.9035	-++	0.2611	-0.0007	0.0017	0.6893	-+-+	0.3695	-0.0035	0.001	0.0007628	--	0.7888
cg21900616	0.0006	0.0002	0.0006125	chr22	+++++-++++	0.4314	20286845	0.0006	0.0002	0.001439	+++-+++	0.3324	0.0007	0.0005	0.2054	+++	0.3386	0.0008	0.0004	0.0344	++++	0.5008	0.0005	0.0002	0.04197	++	0.2526
cg03621084	-0.0005	0.0001	0.0006143	chr5	----------	0.7143	1227286	-0.0005	0.0001	0.001329	-------	0.5385	-0.0007	0.0005	0.2104	---	0.5844	-0.0005	0.0004	0.2368	----	0.7293	-0.0003	0.0002	0.05069	--	0.7901
cg19616844	0.0022	0.0006	0.0006153	chr5	+?????+??+	0.7678	71103650	0.0022	0.0007	0.001435	????+?+	0.4719	0.002	0.0016	0.2087	+??	1	0.002	0.0016	0.2087	+???	1	0.005	0.004	0.2082	?+	1
cg09378238	0.0007	0.0002	0.0006177	chr7	+++++++++-	0.4155	29234786	0.0005	0.0002	0.01336	++++++-	0.8458	0.0018	0.0006	0.00169	+++	0.319	0.0015	0.0004	0.0003165	++++	0.3879	0.0003	0.0003	0.3656	+-	0.8081
cg10989441	0.0004	0.0001	0.0006197	chr1	+++-+-++++	0.09192	231347308	0.0004	0.0001	0.006809	+-+-+++	0.1048	0.0012	0.0004	0.003841	+++	0.7826	0.001	0.0003	0.001721	++++	0.7898	0.0003	0.0001	0.04096	++	0.04804
cg09273716	-0.0032	0.0009	0.0006214	chr20	-+---+--+-	0.7704	35494835	-0.0036	0.001	0.0002818	---+---	0.6852	0	0.0028	0.994	-++	0.8706	-0.0007	0.0023	0.7544	-+-+	0.9228	-0.0049	0.0018	0.007192	--	0.2515
cg06560887	-0.0004	0.0001	0.0006222	chr11	++-+--?---	0.8989	33890371	-0.0004	0.0001	0.001073	-+--?--	0.9494	-0.0004	0.0004	0.3142	++-	0.309	-0.0004	0.0003	0.1313	++--	0.4871	-0.0004	0.0001	0.004752	--	0.9534
cg21049487	-0.0026	0.0007	0.0006241	chr12	---+-----+	0.1845	104328065	-0.0019	0.0008	0.02565	-+----+	0.1505	-0.005	0.0016	0.001891	---	0.9157	-0.0041	0.0014	0.002829	----	0.714	-0.002	0.0013	0.1151	-+	0.2132
cg20480045	0.0006	0.0002	0.0006258	chr1	+++-?++++-	0.3091	168194946	0.0006	0.0002	0.004365	+-?+++-	0.5509	0.0006	0.0003	0.05875	+++	0.06664	0.0005	0.0002	0.009368	++++	0.1396	0.0008	0.0005	0.09354	+-	0.1439
cg07925549	0.002	0.0006	0.0006265	chr12	+++++-+---	0.231	52828840	0.002	0.0006	0.001132	+++-+--	0.1855	0.0019	0.0018	0.294	++-	0.2348	0.0004	0.0014	0.7641	++--	0.217	0.003	0.0009	0.0004561	+-	0.1977
cg04651583	-0.0035	0.001	0.0006286	chr6	-+-?----+-	0.6652	33870691	-0.0044	0.0012	0.0001441	-?-----	0.9823	-0.0004	0.0021	0.842	-++	0.3119	-0.0012	0.0017	0.4773	-+-+	0.4219	-0.0042	0.0016	0.01118	--	0.8051
cg23254316	-0.0013	0.0004	0.0006291	chr11	-+--------	0.7135	12200844	-0.0015	0.0004	0.0003816	-------	0.6324	-0.0003	0.0011	0.7526	-+-	0.6371	-0.0012	0.0009	0.1779	-+--	0.3935	-0.0012	0.0005	0.02398	--	0.156
cg06568880	-0.0014	0.0004	0.0006293	chr17	---------+	0.3745	2166583	-0.0014	0.0004	0.001759	------+	0.1458	-0.0015	0.0011	0.1675	---	0.9164	-0.002	0.0008	0.0209	----	0.8441	-0.0005	0.0005	0.3223	-+	0.1722
cg15847527	-0.0035	0.001	0.0006295	chr7	---??-----	0.2397	47611885	-0.0033	0.0011	0.002645	-??----	0.07901	-0.0047	0.0028	0.08979	---	0.7451	-0.0055	0.002	0.006247	----	0.8649	-0.0014	0.0013	0.2946	--	0.2037
cg23649140	-0.0033	0.001	0.0006301	chr8	++--------	0.7409	37661612	-0.0039	0.0011	0.0002754	-------	0.8376	-0.0006	0.0023	0.7828	++-	0.4488	-0.0011	0.002	0.5826	++--	0.6197	-0.0056	0.0021	0.007117	--	0.9574
cg03914913	-0.0018	0.0005	0.0006312	chr7	?--+------	0.402	130419754	-0.0013	0.0006	0.02713	-+-----	0.6441	-0.0037	0.0012	0.001513	?--	0.3641	-0.0019	0.0008	0.01031	?---	0.09434	-0.0015	0.001	0.1321	--	0.6254
cg13300580	-0.0022	0.0006	0.0006325	chr1	-+--------	0.6911	27440539	-0.0021	0.0007	0.002446	-------	0.908	-0.0031	0.0019	0.09626	-+-	0.1296	-0.0028	0.0015	0.06628	-+--	0.2441	-0.0014	0.0012	0.2343	--	0.5636
cg02314339	-0.0027	0.0008	0.0006334	chr10	-+-+----++	0.009287	91020653	-0.0028	0.0008	0.0005516	-+----+	0.008169	-0.001	0.0027	0.7091	-++	0.1252	-0.0023	0.0022	0.3019	-+-+	0.1903	-0.0031	0.0012	0.01241	-+	0.5821
cg11674763	-0.0037	0.0011	0.0006361	chr2	----------	0.8551	8833332	-0.0037	0.0012	0.001777	-------	0.6332	-0.0037	0.0027	0.168	---	0.8057	-0.0043	0.0021	0.04362	----	0.9069	-0.0064	0.0021	0.001895	--	0.8693
cg01747077	0.0004	0.0001	0.0006369	chr2	+++++-++++	0.2168	211035257	0.0003	0.0001	0.008737	+++-+++	0.1699	0.0007	0.0003	0.01145	+++	0.5306	0.0006	0.0002	0.005031	++++	0.6463	0.0002	0.0002	0.348	++	0.2863
cg18127966	0.0004	0.0001	0.0006369	chr14	++++++++++	0.7531	53019563	0.0004	0.0001	0.004332	+++++++	0.6595	0.0008	0.0004	0.02951	+++	0.7677	0.0007	0.0003	0.01067	++++	0.858	0.0003	0.0002	0.0744	++	0.8196
cg02805871	0.0009	0.0003	0.0006377	chr17	+++-+-++++	0.4921	6939695	0.0008	0.0003	0.002867	+-+-+++	0.2507	0.0012	0.0007	0.08061	+++	0.8557	0.0017	0.0005	0.001045	++++	0.7227	0.0005	0.0004	0.2508	++	0.7546
cg00902374	0.0038	0.0011	0.0006393	chr3	+-+++++-++	0.5337	25461111	0.0043	0.0012	0.0002763	+++++-+	0.8628	0.0001	0.0032	0.9806	+-+	0.1432	0	0.0026	0.9922	+--+	0.2736	0.0042	0.0021	0.04716	++	0.8014
cg15726807	0.0005	0.0001	0.0006404	chr19	+++++-+++-	0.7782	41857198	0.0004	0.0002	0.002896	+++-++-	0.5065	0.0006	0.0003	0.08699	+++	0.9195	0.0006	0.0003	0.03098	++++	0.978	0.0004	0.0002	0.09328	+-	0.3278
cg22872033	-0.0023	0.0007	0.0006426	chr14	?+-??-----	0.7093	21725703	-0.002	0.0008	0.01499	-??----	0.6267	-0.003	0.0012	0.01309	?+-	0.3925	-0.0025	0.0008	0.002323	?+--	0.5801	-0.0013	0.0023	0.5648	--	0.4299
cg22801296	0.0002	0.0001	0.0006434	chr19	+++---+++-	0.2449	44031497	0.0002	0.0001	0.001575	+---++-	0.4172	0.0002	0.0001	0.1909	+++	0.06849	0.0003	0.0001	0.003256	++++	0.09756	0.0002	0.0001	0.01013	+-	0.5554
cg25026755	0.002	0.0006	0.0006456	chr5	+-+++++++-	0.4316	57702195	0.0021	0.0006	0.0009444	++++++-	0.3728	0.0015	0.0016	0.3628	+-+	0.2907	0.0024	0.0012	0.05363	+-++	0.3777	0.0008	0.0009	0.3703	+-	0.2748
cg07134622	-0.0043	0.0013	0.0006476	chr1	--?----??-	0.07408	201729331	-0.0039	0.0014	0.004191	?----?-	0.1084	-0.0063	0.0032	0.04836	--?	0.06281	-0.0063	0.0032	0.04836	--??	0.06281	-0.019	0.0063	0.002385	?-	1
cg25790365	-0.0025	0.0007	0.0006479	chr15	-+---++---	0.05753	50549957	-0.0022	0.0008	0.005483	---++--	0.04925	-0.0048	0.0021	0.02181	-+-	0.2858	-0.0067	0.0018	0.0001875	-+--	0.1184	-0.0022	0.0012	0.06129	--	0.9528
cg21645936	0.0008	0.0002	0.0006511	chr4	++?++-++++	0.04623	54958226	0.0007	0.0003	0.007461	?++-+++	0.01595	0.001	0.0005	0.02667	+++	0.5095	0.0015	0.0003	4.972e-06	++++	0.269	0.0001	0.0011	0.9311	?+	1
cg12569216	-0.0005	0.0002	0.000654	chr17	-+-+-+----	0.7208	78041214	-0.0005	0.0002	0.0009122	-+-+---	0.5619	-0.0004	0.0005	0.3962	-+-	0.5413	-0.0006	0.0003	0.08148	-+--	0.6694	-0.0005	0.0002	0.006722	--	0.2102
cg05260346	0.0021	0.0006	0.0006554	chr6	+??++????+	0.906	158013621	0.0021	0.0007	0.002396	?++???+	0.7581	0.002	0.0013	0.1215	+??	1	0.002	0.0013	0.1215	+???	1	0.0005	0.0023	0.8336	?+	1
cg07810039	-0.0015	0.0004	0.0006556	chr1	-----+----	0.7578	218524558	-0.0016	0.0005	0.0009997	---+---	0.7002	-0.001	0.001	0.2995	---	0.4273	-0.0011	0.0007	0.1224	----	0.6363	-0.0023	0.0008	0.003423	--	0.6625
cg08811227	-0.0027	0.0008	0.0006569	chr16	------++--	0.1655	24697469	-0.0025	0.0009	0.004458	----++-	0.3289	-0.0044	0.0021	0.03981	---	0.07005	-0.0026	0.0018	0.1417	--+-	0.05586	-0.0045	0.0016	0.003481	--	0.3329
cg13610026	-0.0021	0.0006	0.000657	chr9	---+------	0.2531	127140111	-0.0017	0.0006	0.008792	-+-----	0.6374	-0.0059	0.002	0.003037	---	0.2223	-0.0039	0.0013	0.001789	----	0.202	-0.0021	0.001	0.03247	--	0.8558
cg07798610	0.0101	0.003	0.0006573	chr16	+++?+++-+-	0.2358	2867683	0.0092	0.0034	0.006633	+?+++--	0.1335	0.0128	0.006	0.03386	+++	0.4213	0.0062	0.0051	0.2236	++-+	0.114	0.016	0.005	0.00133	+-	0.6296
cg07652628	-0.0056	0.0016	0.0006597	chr12	-+-?------	0.3433	53343514	-0.0052	0.0018	0.003748	-?-----	0.6945	-0.0073	0.004	0.06358	-+-	0.0576	-0.0078	0.0032	0.01452	-+--	0.1246	-0.0068	0.0026	0.008297	--	0.8237
cg08194505	0.0005	0.0001	0.0006615	chr15	+++++-++++	0.4272	25684383	0.0005	0.0002	0.005149	+++-+++	0.4164	0.0008	0.0004	0.03464	+++	0.3082	0.0006	0.0003	0.03787	++++	0.3746	0.0005	0.0002	0.0228	++	0.7047
cg24694665	0.0027	0.0008	0.0006637	chr15	+-++?--++-	0.6712	37782428	0.0029	0.0008	0.0005322	++?--+-	0.5318	0.0009	0.0025	0.715	+-+	0.5718	0.0018	0.0018	0.3069	+-++	0.7163	0.0025	0.0012	0.03861	+-	0.712
cg13553735	0.0002	0.0001	0.0006675	chr19	+-++++-+++	0.7985	45927259	0.0002	0.0001	0.003398	++++-++	0.7567	0.0004	0.0002	0.05703	+-+	0.5047	0.0004	0.0001	0.00422	+-++	0.708	0.0002	0.0001	0.02779	++	0.5931
cg26929394	0.0033	0.001	0.0006678	chr11	++++++++-+	0.6108	112435198	0.0032	0.0011	0.002659	+++++++	0.4327	0.004	0.0024	0.1041	++-	0.5367	0.0032	0.0021	0.1331	+++-	0.6473	0.001	0.002	0.6123	++	0.3471
cg25557858	-0.0004	0.0001	0.000671	chr8	+--++-----	0.2167	28558598	-0.0005	0.0001	0.001261	-++----	0.3493	-0.0003	0.0002	0.2026	+--	0.09142	-0.0004	0.0002	0.01635	+---	0.1649	-0.0006	0.0002	0.01794	--	0.9089
cg25836589	0.0014	0.0004	0.0006746	chr11	-++?+--++-	0.4234	1435996	0.0012	0.0004	0.004272	+?+--+-	0.6433	0.0027	0.0012	0.0325	-++	0.1689	0.0027	0.0009	0.004343	-+++	0.3135	0.0011	0.0005	0.01848	+-	0.4039
cg22632987	-0.0008	0.0002	0.0006777	chr11	----++----	0.8713	73362898	-0.0008	0.0003	0.001802	--++---	0.6417	-0.0012	0.0009	0.1539	---	0.9652	-0.0011	0.0007	0.09047	----	0.9882	-0.0009	0.0003	0.003753	--	0.5925
cg26794700	0.0036	0.0011	0.0006781	chr11	+??+?+++++	0.06454	56587595	0.0029	0.0011	0.009328	?+?++++	0.8529	0.0115	0.0037	0.00165	+?+	0.01987	0.0087	0.0029	0.002774	+?++	0.0297	0.0032	0.0037	0.3906	?+	1
cg02737554	0.002	0.0006	0.0006803	chr3	+-++++++++	0.63	36690229	0.0021	0.0006	0.000967	+++++++	0.6077	0.0016	0.0019	0.3992	+-+	0.2868	0.0014	0.0013	0.2923	+-++	0.4719	0.0024	0.0009	0.005077	++	0.2469
cg12919006	-0.0013	0.0004	0.0006811	chr2	+---+-----	0.1131	124782713	-0.0014	0.0004	0.0008056	--+----	0.05205	-0.0008	0.001	0.4508	+--	0.4654	-0.0005	0.0007	0.5049	+---	0.6374	-0.0024	0.0007	0.0002721	--	0.09754
cg06890553	-0.0009	0.0003	0.0006819	chr19	-+--------	0.4767	44556485	-0.0011	0.0003	0.0003786	-------	0.3116	-0.0003	0.0006	0.5878	-+-	0.9558	-0.0004	0.0004	0.3079	-+--	0.9881	-0.0012	0.0005	0.009291	--	0.4484
cg08235912	0.0007	0.0002	0.0006829	chr3	-+++++++++	0.1398	184079216	0.0007	0.0002	0.0004225	+++++++	0.07164	0.0002	0.0005	0.6851	-++	0.6431	0.0005	0.0004	0.1597	-+++	0.6214	0.0008	0.0003	0.01112	++	0.001813
cg00925557	0.0008	0.0002	0.0006844	chr15	+++++-++++	0.8149	93631919	0.0007	0.0002	0.002345	+++-+++	0.5356	0.0009	0.0006	0.1246	+++	0.9663	0.001	0.0005	0.03374	++++	0.9942	0.0008	0.0003	0.0177	++	0.3981
cg03074946	-0.0031	0.0009	0.0006846	chr12	-----+---+	0.5152	120687694	-0.0029	0.001	0.002636	---+--+	0.3232	-0.0048	0.0028	0.08964	---	0.6636	-0.0068	0.0022	0.002553	----	0.5339	-0.003	0.0016	0.06989	-+	0.3697
cg24644605	0.002	0.0006	0.0006852	chr4	+-++++++-+	0.4089	40944984	0.0024	0.0006	0.0001416	+++++++	0.987	-0.0004	0.0015	0.7871	+--	0.06971	0.0006	0.0011	0.6023	+-+-	0.09402	0.002	0.0009	0.02139	++	0.7172
cg06910048	0.0004	0.0001	0.0006854	chr11	+++?+-++++	0.1077	111945509	0.0003	0.0001	0.003597	+?+-+++	0.3036	0.0006	0.0003	0.06102	+++	0.03621	0.0006	0.0002	0.007183	++++	0.0828	0.0004	0.0001	0.009422	++	0.3602
cg20023898	-0.0028	0.0008	0.0006857	chr16	--------++	0.6609	67048469	-0.0029	0.0009	0.0009048	------+	0.7176	-0.0019	0.0024	0.4168	--+	0.2311	-0.0028	0.0018	0.1145	---+	0.3564	-0.0028	0.0013	0.04069	-+	0.277
cg22040809	-0.0206	0.0061	0.0006871	chr6	??????-???	1	26522578	-0.0206	0.0061	0.0006871	????-??	1	NA	NA	NA	NA	NA	NA	NA	NA	NA	NA	NA	NA	NA	NA	NA
cg16622061	-0.0065	0.0019	0.0006873	chr16	-+-?----+-	0.8011	86888736	-0.0073	0.0021	0.0004024	-?-----	0.9809	-0.0016	0.005	0.7474	-++	0.2536	-0.0037	0.0042	0.3773	-+-+	0.34	-0.0056	0.0033	0.09231	--	0.7744
cg24784794	-0.0007	0.0002	0.0006881	chr3	+---++-+-+	0.1633	79068831	-0.0007	0.0002	0.0009878	--++-++	0.0522	-0.0006	0.0007	0.4117	+--	0.7757	-0.0002	0.0005	0.7004	+-+-	0.7798	-0.0008	0.0003	0.00126	-+	0.03486
cg09706122	-0.003	0.0009	0.0006884	chr12	----+----+	0.175	54071165	-0.0027	0.001	0.005319	--+---+	0.07299	-0.0055	0.0025	0.02735	---	0.963	-0.007	0.0018	0.0001393	----	0.8034	-0.0016	0.0016	0.3192	-+	0.4031
cg17024258	-0.002	0.0006	0.0006893	chr1	------+--+	0.3852	160370982	-0.0018	0.0006	0.003324	----+-+	0.3566	-0.0033	0.0017	0.062	---	0.3057	-0.0044	0.0013	0.0008438	----	0.3522	-0.001	0.0011	0.3712	-+	0.2722
cg02578942	0.0051	0.0015	0.0006933	chr3	+++++++??-	0.7532	174558606	0.0051	0.002	0.008471	+++++?-	0.5302	0.005	0.0023	0.03237	++?	0.7639	0.005	0.0023	0.03237	++??	0.7639	0.0065	0.0051	0.2053	+-	0.3943
cg02079413	-0.0021	0.0006	0.0006952	chr11	----+++--+	0.6616	2986505	-0.0021	0.0008	0.009487	--+++-+	0.5336	-0.0022	0.001	0.02877	---	0.4323	-0.002	0.0009	0.0212	----	0.6216	-0.0026	0.0012	0.02692	-+	0.6454
cg17116500	-0.0012	0.0004	0.0006982	chr12	-+-------+	0.9561	56600222	-0.0013	0.0004	0.001654	------+	0.8626	-0.0011	0.0008	0.201	-+-	0.74	-0.0013	0.0006	0.03971	-+--	0.863	-0.0014	0.0006	0.0109	-+	0.2715
cg00230183	0.003	0.0009	0.0007024	chr16	++++?--+++	0.1272	88882565	0.002	0.001	0.0548	++?--++	0.3712	0.0067	0.0019	0.0003793	+++	0.3072	0.0059	0.0016	0.0001593	++++	0.4141	0.0033	0.0018	0.06595	++	0.1561
cg24403497	0.0007	0.0002	0.0007033	chr1	+++-++++++	0.04137	146644500	0.0006	0.0002	0.005569	+-+++++	0.0229	0.0011	0.0005	0.03162	+++	0.3674	0.0009	0.0004	0.01633	++++	0.5076	0.0007	0.0004	0.04674	++	0.003578
cg01336231	-0.0003	0.0001	0.0007036	chr3	+----+----	0.1447	16523047	-0.0004	0.0001	0.0004959	---+---	0.06341	-0.0001	0.0002	0.4717	+--	0.8565	-0.0004	0.0001	0.003177	+---	0.3788	-0.0002	0.0001	0.1693	--	0.01004
cg06045579	-0.0008	0.0002	0.0007067	chr16	-+--?-----	0.2886	87425660	-0.0008	0.0003	0.01795	--?----	0.2319	-0.0009	0.0004	0.01534	-+-	0.2444	-0.0008	0.0003	0.005089	-+--	0.3986	-0.0016	0.0012	0.2011	--	0.04248
cg08547601	0.0006	0.0002	0.0007092	chr4	+++-+-++++	0.1248	89204953	0.0005	0.0002	0.002088	+-+-+++	0.05593	0.0008	0.0005	0.1384	+++	0.4856	0.0009	0.0004	0.01291	++++	0.6569	0.0006	0.0002	0.008409	++	0.1038
cg14191688	-0.0033	0.001	0.0007112	chr11	-+--?---+-	0.2108	70257035	-0.0042	0.0011	7.978e-05	--?----	0.5046	0.0007	0.0022	0.7494	-++	0.3137	-0.0023	0.0017	0.1746	-+-+	0.05735	-0.0041	0.0016	0.0107	--	0.6949
cg04890480	-0.0024	0.0007	0.0007131	chr1	-+--?----+	0.4676	181073734	-0.0023	0.0008	0.002646	--?---+	0.375	-0.0032	0.002	0.1063	-+-	0.3464	-0.0045	0.0015	0.003105	-+--	0.3698	-0.0026	0.0011	0.02141	-+	0.3825
cg03036514	0.0005	0.0001	0.0007193	chr1	-++++-++++	0.65	120255011	0.0005	0.0002	0.002011	+++-+++	0.5919	0.0005	0.0004	0.1681	-++	0.3255	0.0006	0.0003	0.03673	-+++	0.5061	0.0003	0.0002	0.2516	++	0.4363
cg19781053	-0.0004	0.0001	0.0007222	chr15	++--------	0.4508	30114912	-0.0004	0.0001	0.001015	-------	0.398	-0.0003	0.0003	0.3527	++-	0.3021	-0.0005	0.0002	0.009735	++--	0.3155	-0.0003	0.0002	0.0518	--	0.0424
cg11192223	-0.0017	0.0005	0.000723	chr4	-----+----	0.5793	6114498	-0.0017	0.0005	0.001536	---+---	0.3122	-0.0019	0.0016	0.2331	---	0.8046	-0.0016	0.0012	0.1731	----	0.9154	-0.0014	0.0006	0.02873	--	0.05354
cg06160440	0.0002	0.0001	0.0007236	chr1	+-++++++-+	0.1776	155243364	0.0002	0.0001	0.001075	+++++++	0.4183	0.0002	0.0002	0.347	+--	0.03905	0.0001	0.0001	0.3821	+-+-	0.08545	0.0002	0.0001	0.05941	++	0.1072
cg02861082	0.0009	0.0003	0.0007237	chr2	+??++????+	0.2968	136633712	0.0018	0.0005	0.0009502	?++???+	0.8159	0.0006	0.0003	0.05158	+??	1	0.0006	0.0003	0.05158	+???	1	0.0023	0.001	0.02357	?+	1
cg13309628	0.0008	0.0002	0.0007249	chr20	+++++-++++	0.4796	3801056	0.0008	0.0003	0.001783	+++-+++	0.2307	0.0007	0.0005	0.194	+++	0.808	0.0009	0.0004	0.03288	++++	0.8795	0.0008	0.0004	0.04044	++	0.1406
cg15722731	0.0002	0.0001	0.0007253	chr6	+-++++?++-	0.8498	122720674	0.0002	0.0001	0.001846	++++?+-	0.918	0.0001	0.0001	0.09957	+-+	0.441	0.0002	0.0001	0.002532	+-++	0.4934	0.0002	0.0002	0.1919	+-	0.2335
cg27423729	0.0002	0.0001	0.0007276	chr19	+-+-++++++	0.5795	12273841	0.0002	0.0001	0.0003867	+-+++++	0.5995	0.0001	0.0001	0.5816	+-+	0.4724	0.0002	0.0001	0.1117	+-++	0.2304	0.0002	0.0001	0.02368	++	0.3111
cg19557110	-0.0024	0.0007	0.000728	chr17	-----+---+	0.9031	4082271	-0.0024	0.0008	0.002516	---+--+	0.6818	-0.0028	0.0018	0.127	---	0.9421	-0.0036	0.0015	0.01913	----	0.846	-0.0025	0.0011	0.02727	-+	0.3387
cg00342415	0.0017	0.0005	0.0007298	chr9	-+++++++--	0.8166	138636552	0.002	0.0005	0.0003299	++++++-	0.8705	0.0002	0.0014	0.8994	-+-	0.5431	0.0011	0.0011	0.3485	-++-	0.4604	0.0016	0.0007	0.0258	+-	0.454
cg03407648	0	0	0.0007316	chr17	+++---++++	0.3212	29158985	0	0	0.004993	+---+++	0.2022	0.0001	0	0.02046	+++	0.9989	0.0001	0	0.0002086	++++	0.951	0	0	0.02568	++	0.3594
cg25565203	0.0018	0.0005	0.0007374	chr5	+++?+-+++-	0.4703	56989227	0.0017	0.0006	0.003711	+?+-++-	0.2491	0.0028	0.0015	0.062	+++	0.7847	0.0028	0.001	0.005824	++++	0.9222	0.0017	0.0007	0.01272	+-	0.144
cg13137458	-0.0004	0.0001	0.0007377	chr11	---------+	0.9988	77160347	-0.0004	0.0001	0.0008567	------+	0.9819	-0.0003	0.0005	0.5382	---	0.9961	-0.0005	0.0003	0.1304	----	0.93	-0.0004	0.0002	0.004295	-+	0.4646
cg00783712	0.0019	0.0006	0.00074	chr1	+-++++++++	0.7369	239974513	0.0019	0.0006	0.0009651	+++++++	0.6639	0.0013	0.0016	0.4194	+-+	0.4115	0.0027	0.0011	0.01388	+-++	0.322	0.0013	0.0008	0.1066	++	0.8523
cg02092880	0.0001	0	0.0007403	chr10	+-+---++++	0.03638	124892621	0.0001	0	0.005268	+---+++	0.04328	0.0002	0.0001	0.01951	+-+	0.2167	0.0001	0	0.00213	+-++	0.3786	0.0001	0	0.008893	++	0.07943
cg15311822	-0.0012	0.0004	0.0007424	chr2	----------	0.8248	9144618	-0.0011	0.0004	0.003298	-------	0.6573	-0.0019	0.0011	0.07332	---	0.7776	-0.0016	0.0007	0.02719	----	0.8934	-0.0005	0.0006	0.3642	--	0.3326
cg24721873	-0.0025	0.0008	0.0007424	chr10	-+?----??-	0.1033	135334122	-0.0028	0.0008	0.0009551	?----?-	0.05233	-0.0016	0.0017	0.3531	-+?	0.3774	-0.0016	0.0017	0.3531	-+??	0.3774	-0.0022	0.0081	0.7828	?-	1
cg17819635	-0.0015	0.0004	0.0007427	chr1	+---+---++	0.2861	67217673	-0.0017	0.0005	0.0002368	--+---+	0.3053	0.0002	0.0013	0.8424	+-+	0.4714	-0.0012	0.0009	0.1687	+--+	0.2395	-0.0016	0.0007	0.01322	-+	0.6831
cg13071729	-0.0003	0.0001	0.0007434	chr1	++--+-----	0.2589	201617443	-0.0003	0.0001	0.0007565	--+----	0.7813	-0.0002	0.0005	0.7235	++-	0.01885	-0.0004	0.0003	0.1842	++--	0.0395	-0.0003	0.0001	0.002695	--	0.596
cg16421616	0.0037	0.0011	0.0007434	chr2	++-++-+++-	0.03219	151444499	0.0031	0.0011	0.007057	-++-++-	0.03018	0.0091	0.0035	0.009131	+++	0.4408	0.0091	0.0032	0.004474	++++	0.6507	-0.0015	0.0021	0.4531	--	0.5813
cg13808714	-0.0007	0.0002	0.0007456	chr4	-+--+-----	0.3533	163085697	-0.0007	0.0002	0.002096	--+----	0.5418	-0.0008	0.0006	0.1661	-+-	0.08455	-0.0006	0.0004	0.103	-+--	0.1631	-0.0009	0.0003	0.01054	--	0.7056
cg26081071	-0.0018	0.0005	0.0007471	chr13	----++----	0.5718	20701668	-0.0019	0.0006	0.0009447	--++---	0.3251	-0.0012	0.0016	0.4441	---	0.7688	-0.0014	0.001	0.1551	----	0.9093	-0.003	0.0008	0.0003376	--	0.2488
cg00858015	0.0007	0.0002	0.0007525	chr6	++++?-++++	0.5376	111279703	0.0007	0.0003	0.003879	++?-+++	0.2563	0.0006	0.0003	0.07433	+++	0.8732	0.0006	0.0002	0.02061	++++	0.9653	0.0012	0.0005	0.02299	++	0.1486
cg11038280	0.0006	0.0002	0.0007553	chr7	+++++-++++	0.5873	92466132	0.0006	0.0002	0.002084	+++-+++	0.3336	0.0007	0.0005	0.1707	+++	0.7362	0.0007	0.0004	0.05385	++++	0.8849	0.0005	0.0003	0.1314	++	0.155
cg21404224	0.0003	0.0001	0.0007554	chr15	++++?-++++	0.2316	23086897	0.0003	0.0001	0.003122	++?-+++	0.4686	0.0006	0.0003	0.06527	+++	0.07689	0.0006	0.0002	0.005579	++++	0.1553	0.0002	0.0001	0.02133	++	0.8722
cg23738833	0.0002	0.0001	0.0007555	chr1	++?-++++++	0.1703	28832381	0.0002	0.0001	0.01469	?-+++++	0.4557	0.0002	0.0001	0.01969	+++	0.0323	0.0002	0.0001	0.0003391	++++	0.07495	0.0004	0.0009	0.6502	?+	1
cg01325409	0.0025	0.0008	0.0007556	chr15	+-++++++++	0.3285	48413102	0.0024	0.0008	0.002117	+++++++	0.2342	0.0035	0.0024	0.1487	+-+	0.3607	0.0047	0.0019	0.01335	+-++	0.4425	0.0013	0.0013	0.3094	++	0.1185
cg13243377	0.0005	0.0002	0.0007566	chr8	+++++-++++	0.3863	17103891	0.0004	0.0002	0.007958	+++-+++	0.3576	0.0009	0.0004	0.01705	+++	0.4575	0.0008	0.0003	0.006539	++++	0.6198	0.0004	0.0002	0.09388	++	0.04797
cg10144924	0.001	0.0003	0.0007568	chr22	++++++++++	0.3081	24063232	0.001	0.0003	0.003719	+++++++	0.1464	0.0017	0.0009	0.06037	+++	0.8074	0.0016	0.0006	0.008576	++++	0.9324	0.0005	0.0004	0.2167	++	0.9926
cg26033520	-0.0036	0.0011	0.0007575	chr10	-----+----	0.8089	74004071	-0.0035	0.0011	0.002413	---+---	0.5644	-0.0044	0.0029	0.1366	---	0.8332	-0.0055	0.0025	0.03184	----	0.8218	-0.0049	0.0018	0.005346	--	0.8619
cg19307232	0.0002	0.0001	0.0007594	chr22	+-++++++++	0.9791	24551729	0.0002	0.0001	0.003489	+++++++	0.9887	0.0004	0.0002	0.06754	+-+	0.5722	0.0004	0.0001	0.01041	+-++	0.7728	0.0002	0.0001	0.0168	++	0.9173
cg18113826	-0.0042	0.0013	0.0007603	chr6	-----++--+	0.9309	31583942	-0.0049	0.0014	0.0005578	---++-+	0.8823	-0.0018	0.0027	0.4947	---	0.8745	-0.0034	0.0021	0.1126	----	0.7407	-0.0044	0.002	0.02804	-+	0.541
cg20503117	0.0005	0.0002	0.0007624	chr3	+++++-++++	0.6975	5164013	0.0005	0.0002	0.001865	+++-+++	0.488	0.0006	0.0005	0.1977	+++	0.6176	0.0005	0.0003	0.1758	++++	0.7711	0.0006	0.0002	0.004479	++	0.1795
cg02081364	0.0005	0.0001	0.0007641	chr1	+++-+--+++	0.2197	247267551	0.0004	0.0001	0.004341	+-+--++	0.1141	0.0008	0.0004	0.04578	+++	0.6606	0.0007	0.0003	0.01179	++++	0.8333	0.0006	0.0002	0.0007708	++	0.1062
cg04447362	0.0019	0.0006	0.0007658	chr2	+-+?-+++++	0.7276	237654635	0.002	0.0006	0.001034	+?-++++	0.6304	0.0013	0.0015	0.3873	+-+	0.4422	0.0024	0.0011	0.02206	+-++	0.4312	0.0016	0.0008	0.03679	++	0.6733
cg01299779	-0.0006	0.0002	0.0007673	chr19	+---?+---+	0.3291	48909481	-0.0005	0.0002	0.01146	--?+--+	0.6246	-0.0015	0.0005	0.005051	+--	0.2551	-0.0011	0.0004	0.01132	+---	0.2183	-0.0004	0.0002	0.05003	-+	0.5019
cg26635603	-0.0004	0.0001	0.0007676	chr21	-+--+----+	0.3852	30671891	-0.0003	0.0001	0.02352	--+---+	0.3009	-0.0007	0.0002	0.005348	-+-	0.6726	-0.0005	0.0002	0.005987	-+--	0.5443	-0.0005	0.0002	0.01937	-+	0.1593
cg13431811	-0.0202	0.006	0.0007677	chr13	??????-???	1	101108790	-0.0202	0.006	0.0007677	????-??	1	NA	NA	NA	NA	NA	NA	NA	NA	NA	NA	NA	NA	NA	NA	NA
cg13730600	0.0022	0.0007	0.0007701	chr4	++++++-+++	0.4357	24011589	0.002	0.0007	0.002865	++++-++	0.2272	0.0035	0.0021	0.09037	+++	0.8113	0.0039	0.0016	0.01268	++++	0.9128	0.0016	0.001	0.1317	++	0.4986
cg03683164	-0.0008	0.0003	0.0007734	chr16	-+----+---	0.3131	1547663	-0.0009	0.0003	0.000745	----+--	0.3224	-0.0004	0.0008	0.6273	-+-	0.2028	-0.0002	0.0006	0.6959	-+--	0.351	-0.0009	0.0003	0.003757	--	0.824
cg09386971	-0.001	0.0003	0.0007746	chr8	-----+----	0.4968	82644505	-0.0009	0.0003	0.002207	---+---	0.8298	-0.0014	0.0009	0.1445	---	0.06899	-0.0016	0.0007	0.01331	----	0.138	-0.0011	0.0004	0.009329	--	0.9829
cg13876325	-0.0023	0.0007	0.0007822	chr17	-+-------+	0.8575	16190098	-0.0024	0.0007	0.0008286	------+	0.7223	-0.0013	0.0022	0.5561	-+-	0.6622	-0.0015	0.0018	0.3821	-+--	0.8361	-0.0029	0.0011	0.007735	-+	0.3077
cg09567511	0.003	0.0009	0.0007826	chr4	-+++?++++-	0.4212	6155914	0.0034	0.001	0.0006749	++?+++-	0.2921	0.0014	0.0019	0.4547	-++	0.5642	0.0038	0.0015	0.01212	-+++	0.1453	0.0022	0.0016	0.1699	+-	0.3427
cg16337574	-0.0007	0.0002	0.0007831	chr12	----+-+--+	0.4434	56109265	-0.0006	0.0002	0.01259	--+-+-+	0.6475	-0.0016	0.0006	0.005269	---	0.37	-0.0013	0.0005	0.005695	----	0.4034	-0.0005	0.0003	0.07794	-+	0.5279
cg10834082	0.0024	0.0007	0.0007834	chr15	+-++++++-+	0.6852	80500594	0.0026	0.0007	0.0004123	+++++++	0.7876	-0.0002	0.0024	0.9368	+--	0.3383	0.0004	0.002	0.8526	+-+-	0.5095	0.0027	0.001	0.006752	++	0.4624
cg04842038	-0.0011	0.0003	0.0007841	chr8	-+----+---	0.153	1307402	-0.001	0.0003	0.003471	----+--	0.2852	-0.0016	0.0009	0.07651	-+-	0.06672	-0.0012	0.0007	0.08282	-+--	0.1148	-0.0014	0.0004	0.001402	--	0.1339
cg04270013	0.0014	0.0004	0.0007877	chr16	+-++-+++++	0.2928	66172061	0.0016	0.0005	0.0003791	++-++++	0.2215	0.0001	0.0012	0.9014	+-+	0.5641	0.0002	0.0009	0.796	+-++	0.762	0.0017	0.0006	0.006425	++	0.641
cg04471176	0.0004	0.0001	0.0007881	chr21	--+++-?+++	0.3543	44515263	0.0005	0.0001	0.0005933	+++-?++	0.1742	0.0002	0.0003	0.5668	--+	0.8551	0.0006	0.0002	0.01043	--++	0.3124	0.0004	0.0002	0.02739	++	0.3835
cg06024039	0.0008	0.0002	0.0007892	chr6	--++--++++	0.03178	25726884	0.0008	0.0003	0.002346	++--+++	0.02416	0.0011	0.0007	0.1457	--+	0.1604	0.0009	0.0005	0.06806	--++	0.2911	0.0007	0.0003	0.0336	++	0.6332
cg12873610	-0.0033	0.001	0.0007904	chr17	---?-+---+	0.7452	27044322	-0.0034	0.0011	0.002813	-?-+--+	0.6636	-0.0031	0.002	0.1246	---	0.3949	-0.0028	0.0016	0.08299	----	0.5925	-0.0048	0.0017	0.004239	-+	0.263
cg15484406	0.0037	0.0011	0.0007906	chr14	++++++++++	0.9949	94461913	0.0041	0.0012	0.0005678	+++++++	0.988	0.0013	0.003	0.6678	+++	0.9931	0.0019	0.0024	0.4391	++++	0.9875	0.0026	0.0023	0.2601	++	0.9436
cg16661579	0.0002	0.0001	0.000791	chr10	+-++?++++-	0.6234	95462206	0.0002	0.0001	0.01076	++?+++-	0.7712	0.0003	0.0001	0.0191	+-+	0.2295	0.0003	0.0001	0.02464	+-++	0.3128	0.0002	0.0001	0.02103	+-	0.8212
cg22507772	-0.0022	0.0007	0.0007911	chr6	-----+--++	0.03758	6759831	-0.0023	0.0007	0.0008168	---+--+	0.008225	-0.0012	0.0021	0.5791	--+	0.8844	-0.0034	0.0017	0.03918	---+	0.3751	-0.004	0.0012	0.0005447	-+	0.4888
cg19494913	-0.0016	0.0005	0.0007964	chr17	----+-----	0.1469	54675231	-0.0017	0.0005	0.001635	--+----	0.04119	-0.0013	0.0011	0.2321	---	0.9306	-0.0017	0.0008	0.04194	----	0.9186	-0.0017	0.0009	0.04761	--	0.08279
cg20698924	-0.0012	0.0003	0.0008006	chr15	----?++--+	0.5156	28344730	-0.0013	0.0004	0.000849	--?++-+	0.4435	-0.0006	0.0007	0.3794	---	0.416	-0.0014	0.0005	0.003209	----	0.2893	-0.0011	0.0006	0.07227	-+	0.2759
cg10803243	-0.0016	0.0005	0.0008013	chr13	--------+-	0.5878	99706358	-0.0016	0.0005	0.002917	-------	0.8465	-0.0015	0.001	0.1226	--+	0.09167	-0.0019	0.0008	0.01422	---+	0.1596	-0.0014	0.0008	0.08382	--	0.9265
cg18222865	-0.0029	0.0009	0.0008038	chr11	-+--------	0.09867	14664689	-0.0024	0.0009	0.007587	-------	0.5914	-0.0067	0.0026	0.01094	-+-	0.02105	-0.0066	0.0022	0.002954	-+--	0.05205	-0.0016	0.0015	0.2838	--	0.1293
cg22045977	0.0017	0.0005	0.000804	chr8	+++++++-++	0.7114	13155283	0.0017	0.0005	0.002244	+++++-+	0.4535	0.0027	0.0018	0.1392	+++	0.8808	0.0012	0.0014	0.3845	++-+	0.5965	0.0017	0.0007	0.01261	++	0.4578
cg11723848	-0.0005	0.0001	0.0008054	chr4	-+--+----+	0.6108	96470286	-0.0005	0.0001	0.000997	--+---+	0.3938	-0.0003	0.0005	0.4909	-+-	0.6359	-0.0005	0.0003	0.1414	-+--	0.8053	-0.0006	0.0002	0.0009642	-+	0.8368
cg24587297	0.0042	0.0012	0.0008083	chr2	+++++-++++	0.2553	151534222	0.0039	0.0013	0.003708	+++-+++	0.2588	0.0064	0.0036	0.07087	+++	0.2105	0.0067	0.003	0.02552	++++	0.3719	0.0014	0.0025	0.573	++	0.6733
cg07106871	0.0003	0.0001	0.000812	chr12	+-+--++-+-	0.3206	110011630	0.0003	0.0001	0.0214	+--++--	0.4483	0.0005	0.0002	0.007808	+-+	0.1787	0.0003	0.0002	0.05342	+--+	0.06709	0.0004	0.0002	0.01297	+-	0.2436
cg07173823	-0.0031	0.0009	0.0008135	chr1	-+--------	0.3105	45190519	-0.0035	0.001	0.0004565	-------	0.7145	-0.0006	0.0026	0.8258	-+-	0.05873	-0.0023	0.0021	0.2939	-+--	0.0674	-0.0015	0.0018	0.3945	--	0.4244
cg19597382	-0.0009	0.0003	0.0008166	chr4	----?-?+-+	0.4414	147559423	-0.0008	0.0003	0.002266	--?-?++	0.2024	-0.0012	0.0008	0.1555	---	0.6738	-0.0004	0.0006	0.4508	--+-	0.5082	-0.0006	0.0004	0.1366	-+	0.2564
cg19817005	-0.0005	0.0001	0.0008217	chr5	++--+-+---	0.2544	172068692	-0.0006	0.0002	0.0004977	--+-+--	0.3035	-0.0002	0.0003	0.5434	++-	0.2433	-0.0006	0.0002	0.004457	++--	0.07578	-0.0004	0.0003	0.07364	--	0.4824
cg20680284	0.0023	0.0007	0.0008247	chr7	+++++-?+++	0.1338	35497958	0.002	0.0007	0.005688	+++-?++	0.07494	0.0039	0.0019	0.03532	+++	0.4705	0.0028	0.0014	0.04246	++++	0.5149	0.0022	0.0013	0.08444	++	0.2444
cg19464016	-0.0007	0.0002	0.0008268	chr6	-----+-+--	0.158	106533958	-0.0007	0.0002	0.001184	---+-+-	0.06791	-0.0005	0.0006	0.3785	---	0.536	-0.0002	0.0004	0.6151	--+-	0.6185	-0.001	0.0003	0.0009036	--	0.1293
cg00537387	0.0001	0	0.0008273	chr6	+++--+++++	0.8269	31939865	0.0001	0	0.005216	+--++++	0.7222	0.0002	0.0001	0.05918	+++	0.5389	0.0002	0.0001	0.02349	++++	0.7382	0.0001	0	0.01274	++	0.2826
cg14212748	-0.0033	0.001	0.0008274	chr12	-+--------	0.2695	53343703	-0.0032	0.0011	0.002592	-------	0.7449	-0.004	0.0027	0.1397	-+-	0.02327	-0.0052	0.0022	0.01865	-+--	0.04208	-0.004	0.0021	0.05151	--	0.5076
cg11453079	0.0036	0.0011	0.0008291	chr20	+-++++++++	0.4095	43058872	0.004	0.0011	0.000416	+++++++	0.2803	0.0004	0.003	0.8986	+-+	0.7614	0.0013	0.0025	0.5939	+-++	0.8333	0.003	0.0021	0.155	++	0.8822
cg01244944	-0.0029	0.0009	0.0008321	chr4	?---?-?--+	0.2919	187645118	-0.003	0.0009	0.001013	--?-?-+	0.129	-0.0019	0.0026	0.4672	?--	0.8691	-0.0011	0.0018	0.5268	?---	0.9082	-0.0041	0.0015	0.005043	-+	0.5713
cg04910179	0.0023	0.0007	0.0008356	chr1	+-++?++++-	0.748	57816236	0.0023	0.0007	0.002046	++?+++-	0.6955	0.0024	0.0019	0.198	+-+	0.3579	0.0022	0.0014	0.1036	+-++	0.5562	0.0016	0.0011	0.141	+-	0.416
cg03413810	-0.0008	0.0002	0.000836	chr19	++---+----	0.3346	1816254	-0.0008	0.0002	0.001378	---+---	0.7621	-0.0008	0.0008	0.3361	++-	0.03277	-0.0008	0.0006	0.1729	++--	0.07722	-0.0008	0.0003	0.006063	--	0.2548
cg26748477	0.0027	0.0008	0.0008362	chr17	+++++++++-	0.6595	38516415	0.0024	0.0008	0.00374	++++++-	0.7618	0.005	0.0026	0.05718	+++	0.2788	0.0053	0.0021	0.01157	++++	0.4587	0.0015	0.0014	0.2966	+-	0.6281
cg17165580	-0.0002	0.0001	0.0008365	chr1	-+--?++--+	0.2534	156676581	-0.0002	0.0001	0.0005413	--?++-+	0.1703	-0.0001	0.0001	0.6827	-+-	0.487	-0.0002	0.0001	0.05903	-+--	0.4272	-0.0002	0.0001	0.003145	-+	0.5584
cg19878479	-0.0042	0.0013	0.0008383	chr19	+?----+--+	0.6499	49015582	-0.0045	0.0013	0.0008955	----+-+	0.5477	-0.0023	0.0035	0.5004	+?-	0.4114	-0.0017	0.0024	0.4858	+?--	0.6887	-0.0043	0.0023	0.06721	-+	0.6982
cg05096161	-0.0021	0.0006	0.0008386	chr17	---+?---+-	0.1714	46114674	-0.0025	0.0007	0.0003484	-+?----	0.1175	-0.0005	0.0014	0.7303	--+	0.6009	-0.0004	0.001	0.6967	---+	0.7954	-0.0044	0.001	4.922e-06	--	0.9686
cg25356611	-0.0037	0.0011	0.0008393	chr11	-+--+-----	0.07654	1689526	-0.0045	0.0012	0.0002718	--+----	0.03879	-0.0004	0.0025	0.8724	-+-	0.9251	-0.0029	0.0022	0.1799	-+--	0.271	-0.0056	0.002	0.005197	--	0.3969
cg06636195	-0.0044	0.0013	0.0008421	chr2	-+------+?	0.7735	109533679	-0.0052	0.0014	0.0002308	------?	0.9485	0.0013	0.0038	0.7389	-++	0.5597	-0.0013	0.0029	0.6561	-+-+	0.5407	-0.0035	0.0025	0.1605	-?	1
cg13784889	0.0008	0.0002	0.0008436	chr4	+++++-++++	0.3638	89513377	0.0007	0.0003	0.00875	+++-+++	0.2156	0.0014	0.0006	0.01774	+++	0.9204	0.0011	0.0004	0.01507	++++	0.8324	0.0008	0.0004	0.02645	++	0.0398
cg25847835	0.0007	0.0002	0.000845	chr5	+++++-++++	0.1469	147763803	0.0006	0.0003	0.03463	+++-+++	0.1358	0.0011	0.0004	0.004783	+++	0.3114	0.0008	0.0003	0.00661	++++	0.2735	0.0005	0.0006	0.39	++	0.9048
cg05241536	-0.0022	0.0007	0.0008456	chr10	-+--------	0.3708	121298236	-0.0021	0.0007	0.004528	-------	0.2729	-0.0032	0.0017	0.0641	-+-	0.3957	-0.0046	0.0015	0.001528	-+--	0.1928	-0.0009	0.0013	0.4873	--	0.549
cg11367841	0.0005	0.0002	0.0008459	chr11	+-+++-++++	0.866	47270567	0.0006	0.0002	0.001124	+++-+++	0.7235	0.0004	0.0004	0.4082	+-+	0.667	0.0006	0.0003	0.07257	+-++	0.695	0.0004	0.0002	0.05759	++	0.8871
cg14702231	-0.0032	0.001	0.0008473	chr8	++--?---+-	0.3461	11413234	-0.0044	0.0011	2.732e-05	--?----	0.9595	0.0023	0.0022	0.304	+++	0.8188	0.0009	0.0018	0.6186	++-+	0.658	-0.0041	0.0016	0.008723	--	0.824
cg15759721	0.0023	0.0007	0.0008475	chr17	++++++++++	0.8968	57918630	0.0022	0.0007	0.002804	+++++++	0.7562	0.0036	0.0023	0.1098	+++	0.7976	0.0021	0.0017	0.1955	++++	0.7134	0.0022	0.001	0.03356	++	0.7662
cg00122854	-0.0025	0.0007	0.0008502	chr2	-+--------	0.06018	218898491	-0.0025	0.0008	0.001626	-------	0.088	-0.0023	0.0021	0.2714	-+-	0.07022	-0.0048	0.0017	0.00408	-+--	0.02333	-0.0038	0.0014	0.007119	--	0.3293
cg00262132	-0.0047	0.0014	0.0008507	chr4	++--------	0.7024	113430381	-0.0055	0.0016	0.0004671	-------	0.6517	-0.0014	0.0032	0.6579	++-	0.6461	-0.0036	0.0025	0.1553	++--	0.5402	-0.0024	0.0036	0.5051	--	0.9905
cg13635007	-0.0018	0.0005	0.000851	chr8	----+-----	0.3783	29210154	-0.0016	0.0006	0.006532	--+----	0.2125	-0.0028	0.0013	0.03548	---	0.7387	-0.0015	0.0009	0.09901	----	0.4964	-0.0022	0.0012	0.06112	--	0.9398
cg02695704	-0.0001	0	0.0008516	chr16	---+------	0.3279	1250494	-0.0001	0	0.002372	-+-----	0.1511	-0.0001	0.0001	0.1685	---	0.6525	-0.0001	0.0001	0.05914	----	0.8194	-0.0001	0.0001	0.01841	--	0.2997
cg10537176	0.0024	0.0007	0.0008536	chr2	+++++-+++-	0.8419	133395195	0.0024	0.0008	0.002262	+++-++-	0.8016	0.0031	0.0023	0.1688	+++	0.4153	0.0031	0.0016	0.05535	++++	0.6242	0.0017	0.0012	0.1623	+-	0.3425
cg21680729	-0.0024	0.0007	0.0008567	chr17	-----+----	0.3323	17426422	-0.0025	0.0008	0.001098	---+---	0.132	-0.0016	0.0019	0.4169	---	0.9046	-0.0028	0.0016	0.08303	----	0.7069	-0.0018	0.0011	0.1181	--	0.1873
cg10796931	0.005	0.0015	0.0008569	chr1	+++++++++-	0.7827	162467363	0.0049	0.0016	0.001808	++++++-	0.5083	0.0054	0.0046	0.2386	+++	0.8729	0.0054	0.004	0.185	++++	0.965	0.001	0.0036	0.7826	+-	0.06225
cg13250566	-0.0027	0.0008	0.0008591	chr17	++-?-----+	0.128	40799848	-0.0031	0.0008	0.0002376	-?----+	0.2813	0.0016	0.0027	0.5525	++-	0.1703	-0.0012	0.002	0.5596	++--	0.12	-0.002	0.0011	0.06463	-+	0.1497
cg23076913	0.0021	0.0006	0.0008603	chr1	+++++-+++-	0.84	24435582	0.0018	0.0007	0.006666	+++-++-	0.919	0.0053	0.0021	0.01354	+++	0.7501	0.0041	0.0016	0.01133	++++	0.7362	0.0023	0.001	0.02395	+-	0.7197
cg03766449	0.0028	0.0008	0.0008608	chr15	+-+++-++++	0.9345	89920918	0.0026	0.0009	0.005254	+++-+++	0.9402	0.0038	0.002	0.05738	+-+	0.4579	0.0037	0.0016	0.01895	+-++	0.6672	0.0031	0.0016	0.04978	++	0.3976
cg22437161	0.0008	0.0002	0.0008616	chr7	+++-+-++++	0.06425	155605081	0.0007	0.0002	0.005734	+-+-+++	0.02482	0.0014	0.0007	0.03302	+++	0.7459	0.0008	0.0005	0.09836	++++	0.484	0.0002	0.0004	0.5903	++	0.1829
cg03769927	-0.0019	0.0006	0.0008618	chr1	+-------+-	0.9517	27480849	-0.0022	0.0006	0.00034	-------	0.9771	0.0004	0.0018	0.8337	+-+	0.8534	0.0001	0.0015	0.9465	+--+	0.9433	-0.0025	0.001	0.008906	--	0.9787
cg25778446	0.0022	0.0007	0.0008635	chr4	+-+++-++++	0.07674	94652282	0.0018	0.0007	0.008815	+++-+++	0.571	0.0053	0.002	0.009141	+-+	0.01648	0.0035	0.0015	0.02253	+-++	0.01823	0.0014	0.001	0.1856	++	0.1629
cg13919631	-0.0009	0.0003	0.0008642	chr1	+--+++----	0.4913	38071571	-0.0009	0.0003	0.00175	-+++---	0.3569	-0.0009	0.0008	0.2533	+--	0.4056	-0.0013	0.0006	0.02056	+---	0.4958	-0.001	0.0004	0.005449	--	0.5299
cg13514778	-0.0005	0.0002	0.0008651	chr20	-+--------	0.7088	34204988	-0.0005	0.0002	0.001869	-------	0.4524	-0.0006	0.0005	0.2249	-+-	0.7739	-0.0006	0.0004	0.08504	-+--	0.9144	-0.0005	0.0002	0.02349	--	0.07981
cg13938504	-0.0005	0.0002	0.0008678	chr1	---?---+-+	0.2371	236763796	-0.0004	0.0002	0.007912	-?---++	0.2711	-0.0009	0.0004	0.02061	---	0.2573	-0.0003	0.0003	0.279	--+-	0.04449	-0.0005	0.0002	0.01206	-+	0.4339
cg00520708	-0.001	0.0003	0.0008701	chr5	---+------	0.9772	134181266	-0.0009	0.0003	0.002175	-+-----	0.9287	-0.0016	0.0011	0.1603	---	0.7982	-0.0009	0.0007	0.2303	----	0.7684	-0.001	0.0004	0.01068	--	0.6153
ch.15.23721785F	0.0003	0.0001	0.0008706	chr15	-+++++++++	0.4856	26170692	0.0004	0.0001	0.001548	+++++++	0.5656	0.0002	0.0002	0.2357	-++	0.1905	0.0002	0.0001	0.1916	-+++	0.3292	0.0004	0.0002	0.006843	++	0.476
cg11828820	0.0024	0.0007	0.0008744	chr1	+-++++++++	0.4162	33937646	0.0029	0.0008	0.0003468	+++++++	0.3155	0.0006	0.0014	0.6549	+-+	0.8821	0.0007	0.0012	0.5381	+-++	0.9675	0.0027	0.0013	0.04152	++	0.03246
cg02176678	-0.0067	0.002	0.0008794	chr2	---------+	0.7385	219576539	-0.0064	0.0023	0.005336	------+	0.7121	-0.0077	0.0042	0.06612	---	0.3323	-0.0075	0.0038	0.05218	----	0.5263	-0.0079	0.0043	0.06396	-+	0.741
cg25294504	-0.0034	0.001	0.0008812	chr20	+----++---	0.6701	9491559	-0.0034	0.001	0.00128	---++--	0.4116	-0.0032	0.0038	0.4053	+--	0.7498	-0.003	0.0032	0.3374	+---	0.901	-0.0048	0.0014	0.0003772	--	0.28
cg25402049	-0.0025	0.0008	0.0008825	chr1	---?+-----	0.282	14029875	-0.0023	0.0009	0.01261	-?+----	0.1279	-0.0031	0.0014	0.02416	---	0.6202	-0.0032	0.0012	0.006627	----	0.8047	-0.0013	0.0012	0.2631	--	0.07649
cg12311529	-0.0008	0.0003	0.0008845	chr13	------+---	0.5041	111944449	-0.0006	0.0003	0.03876	----+--	0.8672	-0.0019	0.0006	0.0008199	---	0.5023	-0.0013	0.0004	0.002665	----	0.2448	-0.0006	0.0004	0.09875	--	0.1491
cg20494563	0.003	0.0009	0.0008855	chr4	+++++-++-+	0.1393	127898808	0.0037	0.001	0.0001717	+++-+++	0.206	-0.0012	0.0025	0.6411	++-	0.406	0.001	0.002	0.6079	+++-	0.2573	0.0011	0.0018	0.5458	++	0.2949
cg07574654	0.0004	0.0001	0.0008861	chr7	+++++-+-++	0.6343	11013562	0.0004	0.0001	0.001576	+++-+-+	0.4145	0.0003	0.0003	0.2849	+++	0.6473	0.0001	0.0002	0.4917	++-+	0.6711	0.0005	0.0002	0.006032	++	0.904
cg02042605	0.0004	0.0001	0.0008866	chr17	+++-+-++++	0.8621	74382166	0.0004	0.0001	0.003174	+-+-+++	0.7593	0.0007	0.0004	0.09639	+++	0.6482	0.0005	0.0003	0.08418	++++	0.7618	0.0004	0.0002	0.01409	++	0.5477
cg04131610	0.0022	0.0006	0.0008869	chr3	+-++++++++	0.8655	46411447	0.0022	0.0007	0.001337	+++++++	0.9354	0.0016	0.0018	0.3542	+-+	0.2583	0.001	0.0013	0.4657	+-++	0.3862	0.0027	0.001	0.00563	++	0.7365
cg16900209	-0.0012	0.0004	0.000889	chr4	?-?+--?-++	0.2707	3881653	-0.0015	0.0004	0.0002327	?+--?-+	0.3138	0	0.0009	0.962	?-+	0.5697	-0.0011	0.0006	0.08592	?--+	0.1439	0.004	0.0042	0.334	?+	1
cg25752754	-0.0011	0.0003	0.0008933	chr2	+------??+	0.5345	20349535	-0.0012	0.0003	0.0005921	-----?+	0.6217	0	0.0013	0.9896	+-?	0.1834	0	0.0013	0.9896	+-??	0.1834	-0.0013	0.0004	0.001041	-+	0.09844
cg11619216	-0.0022	0.0007	0.0008934	chr17	-+-+-----+	0.2704	73642080	-0.0022	0.0007	0.002115	-+----+	0.2244	-0.0022	0.0018	0.2072	-+-	0.2364	-0.0032	0.0015	0.03072	-+--	0.2684	-0.0032	0.0011	0.00465	-+	0.6774
cg12877251	-0.0003	0.0001	0.0008938	chr8	-+--+-+-+-	0.5428	9760880	-0.0004	0.0001	0.0003027	--+-+--	0.4945	0.0001	0.0003	0.6676	-++	0.8527	-0.0002	0.0002	0.3037	-+-+	0.392	-0.0004	0.0001	0.00216	--	0.9118
ch.13.650435R	0.0015	0.0005	0.0008955	chr13	-++?+?+??+	0.1113	48581080	0.0016	0.0005	0.0008472	+?+?+?+	0.4296	0.0007	0.0012	0.5229	-+?	0.01726	0.0007	0.0012	0.5229	-+??	0.01726	0.0013	0.0006	0.01768	++	0.8654
cg03542938	0.0012	0.0004	0.0008966	chr20	++++++-+++	0.5459	62677009	0.0011	0.0004	0.003651	++++-++	0.365	0.0021	0.0012	0.0694	+++	0.7328	0.0023	0.0008	0.004577	++++	0.8841	0.0009	0.0005	0.04665	++	0.03292
cg04382656	0.0011	0.0003	0.0008973	chr11	?++??++--+	0.1728	26745489	0.0012	0.0003	0.0004686	+??++-+	0.4919	-0.001	0.0018	0.5763	?+-	0.04327	-0.0009	0.0016	0.5665	?+--	0.1295	0.001	0.0004	0.008515	++	0.723
cg19955105	-0.0006	0.0002	0.0008976	chr2	-+---+--+-	0.5978	29343915	-0.0007	0.0002	0.000744	---+---	0.7539	0	0.0012	0.9786	-++	0.1649	-0.0003	0.001	0.8016	-+-+	0.2706	-0.0006	0.0002	0.00744	--	0.4519
cg03065175	0.0007	0.0002	0.0009001	chr4	-++-++++-+	0.2591	155661758	0.0007	0.0002	0.001668	+-+++++	0.1668	0.001	0.0009	0.2627	-+-	0.366	0.0009	0.0008	0.2329	-++-	0.5672	0.0007	0.0002	0.002985	++	0.04575
cg11408019	0.0004	0.0001	0.0009007	chr3	++++--++++	0.6331	51573058	0.0005	0.0001	0.001407	++--+++	0.4292	0.0003	0.0004	0.3417	+++	0.6025	0.0005	0.0003	0.06769	++++	0.7344	0.0005	0.0002	0.008028	++	0.5391
cg04031361	-0.0025	0.0007	0.0009017	chr1	+--+?-----	0.1918	236557758	-0.0019	0.0008	0.01816	-+?----	0.4034	-0.0053	0.0018	0.004134	+--	0.1929	-0.0032	0.0013	0.01092	+---	0.1281	-0.0025	0.0011	0.02182	--	0.5862
cg17278718	-0.0002	0.0001	0.0009035	chr19	--------++	0.2578	4670639	-0.0003	0.0001	9.865e-05	------+	0.3788	0.0001	0.0002	0.5397	--+	0.8461	-0.0003	0.0001	0.02261	---+	0.04794	-0.0002	0.0001	0.1041	-+	0.8843
cg26020695	-0.0059	0.0018	0.000905	chr13	---?-----+	0.5052	46355841	-0.0066	0.0021	0.001469	-?----+	0.4197	-0.004	0.0035	0.2501	---	0.387	-0.0057	0.0027	0.03307	----	0.4809	-0.0032	0.0029	0.271	-+	0.3612
cg09699159	0.0007	0.0002	0.0009067	chr11	++++-+--+-	0.2648	45115528	0.0006	0.0002	0.005709	++-+---	0.3598	0.0019	0.0008	0.01797	+++	0.3111	0.001	0.0006	0.09146	++-+	0.1648	0.0008	0.0003	0.004763	+-	0.1229
cg27507700	-0.0002	0.0001	0.0009106	chr7	++---+----	0.6819	87230189	-0.0002	0.0001	0.006761	---+---	0.6804	-0.0003	0.0001	0.03901	++-	0.3676	-0.0002	0.0001	0.04618	++--	0.4004	-0.0002	0.0001	0.05172	--	0.8147
cg07068616	0.0004	0.0001	0.0009111	chr7	++?---++++	0.06198	103848319	0.0002	0.0002	0.1585	?---+++	0.07034	0.0005	0.0002	0.000992	+++	0.2407	0.0005	0.0001	0.0001446	++++	0.3477	0.0006	0.0016	0.7264	?+	1
cg25879365	-0.005	0.0015	0.0009114	chr1	??---?----	0.6106	40510058	-0.0046	0.0016	0.004763	---?---	0.5367	-0.0073	0.0039	0.06387	??-	1	-0.0051	0.0025	0.04055	??--	0.4703	-0.0051	0.0033	0.1209	--	0.4859
cg25291653	-0.0015	0.0005	0.0009117	chr20	--+-------	0.02648	19867145	-0.0011	0.0005	0.0187	+------	0.04545	-0.0044	0.0013	0.001147	---	0.6386	-0.004	0.001	3.098e-05	----	0.7946	-0.0001	0.0006	0.9356	+-	0.07323
cg08237309	0.0003	0.0001	0.0009133	chr16	--++--++++	0.1087	2146423	0.0004	0.0001	0.0006411	++--+++	0.1192	0.0001	0.0003	0.7626	--+	0.1718	0.0006	0.0002	0.002689	--++	0.02688	0.0003	0.0001	0.02984	++	0.3353
cg07977614	-0.0063	0.0019	0.0009186	chr1	-++-------	0.1569	242310145	-0.0063	0.0022	0.004463	+------	0.3694	-0.0063	0.0037	0.0886	-+-	0.0364	-0.0081	0.003	0.007427	-+--	0.06319	0.0027	0.0046	0.5596	+-	0.3676
cg20837557	-0.0016	0.0005	0.000919	chr6	-----+----	0.7367	146864278	-0.0015	0.0005	0.004088	---+---	0.9187	-0.0026	0.0014	0.07084	---	0.1741	-0.0018	0.0009	0.05985	----	0.2567	-0.0018	0.0007	0.0127	--	0.9136
cg00223245	0.0039	0.0012	0.0009195	chr3	--++++++++	0.8618	64307530	0.0043	0.0012	0.0006339	+++++++	0.9448	0.001	0.0034	0.7572	--+	0.3356	0.0012	0.0028	0.6849	--++	0.5345	0.0028	0.0023	0.2237	++	0.9513
cg14228238	-0.0004	0.0001	0.0009217	chr3	-+-++-----	0.6766	168864123	-0.0005	0.0001	0.001249	-++----	0.4169	-0.0003	0.0004	0.4206	-+-	0.7878	-0.0002	0.0003	0.5169	-+--	0.8659	-0.0006	0.0002	0.001027	--	0.7578
cg12057741	-0.0003	0.0001	0.0009232	chr8	--------++	0.5217	119964124	-0.0003	0.0001	0.0005214	------+	0.6877	0	0.0003	0.9658	--+	0.208	-0.0001	0.0002	0.6103	---+	0.3327	-0.0003	0.0001	0.02698	-+	0.6474
cg04181189	-0.0016	0.0005	0.0009234	chr11	-+---+---+	0.5926	129817418	-0.0016	0.0005	0.001175	---+--+	0.4469	-0.0011	0.0016	0.4661	-+-	0.4604	-0.0021	0.0012	0.07067	-+--	0.4845	-0.0018	0.0007	0.007108	-+	0.5639
cg18329753	0.0014	0.0004	0.000925	chr19	-+++-+++++	0.3553	33727145	0.0014	0.0004	0.002316	++-++++	0.3945	0.0019	0.0014	0.1778	-++	0.169	0.0016	0.001	0.09805	-+++	0.3051	0.0017	0.0006	0.008071	++	0.669
cg14377739	-0.0001	0	0.0009278	chr9	----++---?	0.1281	139699037	-0.0001	0	0.002181	--++--?	0.04556	-0.0001	0.0001	0.2039	---	0.5471	-0.0001	0.0001	0.1445	----	0.7508	-0.0001	0	0.01077	-?	1
cg05043627	0.0035	0.0011	0.0009287	chr14	+???+?????	0.1472	100769643	0.0022	0.0014	0.1125	??+????	1	0.0053	0.0016	0.001164	+??	1	0.0053	0.0016	0.001164	+???	1	NA	NA	NA	NA	NA
cg14737484	0.0038	0.0011	0.0009342	chr6	+-++++-+++	0.6532	32054561	0.0039	0.0012	0.00151	++++-++	0.5594	0.003	0.0031	0.3299	+-+	0.3859	0.0035	0.0027	0.1929	+-++	0.5726	0.0074	0.0023	0.001305	++	0.828
cg05319305	-0.001	0.0003	0.0009348	chr4	----+-----	0.6969	101111927	-0.0009	0.0003	0.006088	--+----	0.4918	-0.0016	0.0008	0.04219	---	0.8568	-0.0014	0.0005	0.009361	----	0.9282	-0.0007	0.0005	0.1782	--	0.416
cg18365406	0.0009	0.0003	0.0009351	chr19	-++-+-++++	0.01847	11472110	0.0011	0.0003	0.0003476	+-+-+++	0.01955	0.0002	0.0006	0.7768	-++	0.235	0.0004	0.0004	0.3804	-+++	0.3751	0.0016	0.0004	0.000192	++	0.004103
cg01035260	0.0015	0.0005	0.0009365	chr15	++++++++++	0.8561	40721473	0.0014	0.0005	0.003659	+++++++	0.7813	0.0031	0.0017	0.06299	+++	0.7504	0.003	0.0013	0.0198	++++	0.9005	0.0013	0.0006	0.03756	++	0.9096
cg01277438	-0.0027	0.0008	0.0009374	chr18	-+--------	0.5319	77158471	-0.0032	0.0009	0.000366	-------	0.6251	-0.0001	0.0021	0.9526	-+-	0.3895	-0.0025	0.0019	0.1768	-+--	0.07342	-0.0017	0.0018	0.3443	--	0.6919
cg15247269	0.0001	0	0.0009375	chr6	+++++-++++	0.9652	31795125	0.0001	0	0.002125	+++-+++	0.8641	0.0002	0.0001	0.1866	+++	0.9039	0.0002	0.0001	0.05373	++++	0.9735	0.0001	0	0.00496	++	0.5869
cg02787306	0.0008	0.0002	0.0009423	chr17	+++-+-+++-	0.2462	34957963	0.0005	0.0003	0.05252	+-+-++-	0.1992	0.0013	0.0004	0.001903	+++	0.8126	0.0013	0.0003	0.0001001	++++	0.9236	0.0001	0.0005	0.8081	+-	0.206
cg25565505	-0.0004	0.0001	0.0009446	chr3	+----+-+--	0.328	155244042	-0.0004	0.0001	0.001573	---+-+-	0.156	-0.0003	0.0004	0.3285	+--	0.6237	0	0.0003	0.8968	+-+-	0.4652	-0.0006	0.0002	7.858e-05	--	0.5715
cg02883161	-0.001	0.0003	0.0009459	chr12	-+--+-----	0.2038	120807618	-0.0012	0.0004	0.0008366	--+----	0.2325	-0.0005	0.0006	0.3965	-+-	0.2072	-0.0009	0.0004	0.03196	-+--	0.2888	-0.0015	0.0007	0.03062	--	0.07135
cg07123701	0.0063	0.0019	0.000947	chr4	-+++++-+++	0.4231	56024434	0.0064	0.002	0.001699	++++-++	0.1975	0.0059	0.0057	0.2975	-++	0.7593	0.011	0.0045	0.01404	-+++	0.4388	0.0031	0.0041	0.4575	++	0.9485
cg23601783	0.0005	0.0002	0.0009488	chr12	+++++--+++	0.2128	10826694	0.0004	0.0002	0.0301	+++--++	0.8857	0.0017	0.0005	0.0002444	+++	0.2962	0.0013	0.0003	0.000224	++++	0.2524	0.0004	0.0002	0.1024	++	0.3423
cg21883683	0.0008	0.0002	0.000951	chr15	+++++--++-	0.2891	32322525	0.0007	0.0002	0.00416	+++--+-	0.2919	0.0016	0.0008	0.05128	+++	0.3024	0.0018	0.0006	0.00296	++++	0.4685	0.0005	0.0003	0.1032	+-	0.2386
cg05265884	0.0062	0.0019	0.0009514	chr10	-++++-+++-	0.06369	26681244	0.0055	0.002	0.006731	+++-++-	0.4093	0.0099	0.0048	0.03834	-++	0.009478	0.007	0.0039	0.06887	-+++	0.01573	0.005	0.0041	0.2241	+-	0.1519
cg13341668	-0.0023	0.0007	0.0009516	chr3	+--------+	0.408	50359909	-0.0024	0.0008	0.001382	------+	0.2481	-0.0016	0.0018	0.3536	+--	0.5258	-0.0027	0.0015	0.06	+---	0.4627	-0.0016	0.0011	0.1547	-+	0.4771
cg21572000	-0.0007	0.0002	0.000953	chr14	++---+---+	0.5102	69546193	-0.0007	0.0002	0.0006551	---+--+	0.7513	0.0001	0.001	0.8775	++-	0.1303	-0.0004	0.0009	0.6405	++--	0.1366	-0.0006	0.0002	0.008791	-+	0.5756
cg24830233	0.0009	0.0003	0.0009532	chr6	++++-++++-	0.8556	30166423	0.0008	0.0003	0.003221	++-+++-	0.6335	0.0013	0.0008	0.1142	+++	0.9175	0.0013	0.0006	0.02225	++++	0.9812	0.0007	0.0004	0.06114	+-	0.1657
cg00982984	0.0007	0.0002	0.000955	chr15	+++++-++-+	0.1029	45493530	0.0007	0.0002	0.002374	+++-+++	0.2078	0.0006	0.0005	0.1911	++-	0.04691	0.0007	0.0003	0.03994	+++-	0.1046	0.0007	0.0004	0.06174	++	0.2806
cg23902105	0.0022	0.0007	0.0009556	chr6	+-++++++++	0.4945	22009091	0.0022	0.0007	0.002306	+++++++	0.5715	0.003	0.0023	0.1867	+-+	0.1743	0.0029	0.0017	0.08347	+-++	0.3215	0.002	0.001	0.04852	++	0.8184
cg24552015	0.0034	0.001	0.0009557	chr11	+++?+--++-	0.1871	1892038	0.0034	0.0012	0.003342	+?+--+-	0.06036	0.0034	0.0022	0.1293	+++	0.7098	0.0032	0.0018	0.07426	++++	0.8734	0.006	0.0016	0.0002457	+-	0.03002
cg25308542	0.0007	0.0002	0.0009589	chr13	++++++++++	0.5918	92000113	0.0007	0.0002	0.003507	+++++++	0.3674	0.0007	0.0004	0.1227	+++	0.6331	0.0007	0.0004	0.07141	++++	0.8218	0.0007	0.0003	0.02605	++	0.01345
cg05682333	0.0037	0.0011	0.0009656	chr2	+++++-+-++	0.4149	233274291	0.0029	0.0012	0.0164	+++-+-+	0.4661	0.008	0.0028	0.005192	+++	0.6252	0.0042	0.0023	0.06032	++-+	0.137	0.0043	0.0022	0.04903	++	0.3647
cg24055855	0.0014	0.0004	0.0009656	chr17	-+++-+++++	0.3681	1535293	0.0014	0.0005	0.00176	++-++++	0.272	0.0012	0.0011	0.2845	-++	0.3352	0.0011	0.0009	0.2199	-+++	0.5313	0.0015	0.0006	0.008374	++	0.1931
cg19857633	0.0007	0.0002	0.0009657	chr19	-++++-++++	0.7275	13264064	0.0007	0.0002	0.001657	+++-+++	0.5122	0.0005	0.0005	0.2972	-++	0.6759	0.0008	0.0004	0.04695	-+++	0.6885	0.0005	0.0003	0.1171	++	0.9639
cg23098068	-0.0038	0.0012	0.0009662	chr2	-----+----	0.513	172650722	0.006	0.0019	0.001238	++++++?	0.05947	0.0039	0.0049	0.4295	+-+	0.2156	-0.0047	0.0026	0.07581	----	0.5521	-0.0015	0.0023	0.5055	--	0.1067
cg17301216	0.0058	0.0017	0.0009662	chr15	+-+++++++?	0.08564	89920348	-0.0035	0.0012	0.0039	---+---	0.4245	-0.0056	0.0033	0.08872	---	0.3894	0.0091	0.0042	0.03148	+-++	0.06667	0.0142	0.0044	0.001177	+?	1
cg05003791	-0.0005	0.0002	0.000972	chr22	-+-+------	0.7176	39746550	-0.0005	0.0002	0.001525	-+-----	0.5165	-0.0004	0.0005	0.3475	-+-	0.6205	-0.0004	0.0003	0.1681	-+--	0.81	-0.0007	0.0002	0.001399	--	0.143
cg27417526	0.0006	0.0002	0.0009757	chr10	-++++++-++	0.2482	131647429	0.0006	0.0002	0.0005654	+++++-+	0.1397	0	0.0006	0.9584	-++	0.6905	0	0.0005	0.9163	-+-+	0.8463	0.0005	0.0002	0.01116	++	0.04106
cg08497772	-0.0021	0.0006	0.0009761	chr8	-+-?------	0.4574	22407100	-0.0026	0.0007	0.0001677	-?-----	0.7342	0.0008	0.0017	0.6467	-+-	0.4768	-0.0003	0.0013	0.8486	-+--	0.4834	-0.002	0.001	0.03886	--	0.2755
cg03688640	0.0008	0.0002	0.0009806	chr17	+++-+-++++	0.05609	40074656	0.0007	0.0002	0.00599	+-+-+++	0.0644	0.0011	0.0006	0.05214	+++	0.1221	0.0011	0.0004	0.01334	++++	0.24	0.001	0.0004	0.006291	++	0.1275
cg12373617	-0.0009	0.0003	0.0009812	chr5	----+---++	0.0446	113698140	-0.0011	0.0003	0.0002127	--+---+	0.03203	0.0003	0.0007	0.7235	--+	0.7779	0	0.0005	0.9613	---+	0.8441	-0.0018	0.0004	2.16e-05	-+	0.05932
cg07012702	0.0006	0.0002	0.0009822	chr16	-++-?--+++	0.002982	25118409	0.0004	0.0002	0.03657	+-?--++	0.01575	0.0016	0.0004	0.0004387	-++	0.1765	0.0014	0.0003	8.771e-06	-+++	0.2951	0.0004	0.0002	0.105	++	0.01156
cg05284742	-0.0018	0.0006	0.0009844	chr14	-+--++----	1.859e-06	93552128	-0.0015	0.0006	0.01235	--++---	0.0003406	-0.0045	0.0016	0.005843	-+-	0.0004661	-0.0062	0.0013	1.161e-06	-+--	0.0003928	-0.0009	0.0008	0.2847	--	0.9571
cg27309287	0.0002	0.0001	0.0009864	chr1	+++++--+++	0.1215	63833047	0.0002	0.0001	0.006346	+++--++	0.2093	0.0008	0.0003	0.009068	+++	0.3324	0.0008	0.0002	0.0001858	++++	0.5314	0.0002	0.0001	0.02825	++	0.1748
cg22927599	-0.0001	0	0.0009867	chr4	?---?-?--+	0.7836	108641602	-0.0001	0	0.0007398	--?-?-+	0.7345	0	0.0001	0.7522	?--	0.4551	-0.0001	0.0001	0.08589	?---	0.4119	-0.0001	0	0.009288	-+	0.4665
cg17411135	-0.0013	0.0004	0.0009889	chr4	------+-+-	0.1106	55092375	-0.0014	0.0004	0.001498	----+--	0.3672	-0.001	0.0011	0.3456	--+	0.02128	-0.0008	0.0007	0.3107	---+	0.0503	-0.0017	0.0007	0.01532	--	0.6574
cg12458003	-0.0024	0.0007	0.0009906	chr1	-+--------	0.4828	204960826	-0.0026	0.0008	0.0009304	-------	0.5413	-0.0011	0.0022	0.6094	-+-	0.2099	-0.0019	0.0018	0.3018	-+--	0.3228	-0.0015	0.0011	0.1825	--	0.1394
cg02919122	-0.0036	0.0011	0.0009937	chr3	-+-------+	0.9601	112109797	-0.0034	0.0011	0.002692	------+	0.9738	-0.0051	0.0036	0.1538	-+-	0.44	-0.0047	0.0031	0.1352	-+--	0.6351	-0.0049	0.0021	0.01645	-+	0.6288
cg22695532	-0.0013	0.0004	0.0009965	chr1	----+----+	0.2639	84158538	-0.0013	0.0004	0.001875	--+---+	0.09029	-0.0013	0.0012	0.2792	---	0.8907	-0.0009	0.0008	0.2662	----	0.9406	-0.0021	0.0006	0.0004798	-+	0.2121
cg03990033	-0.0011	0.0003	0.0009972	chr1	-?--?+--+-	0.3031	208084030	-0.0012	0.0003	0.0005563	--?+---	0.4701	0	0.0011	0.9767	-?+	0.1012	-0.0013	0.0006	0.0373	-?-+	0.09017	-0.0009	0.0004	0.04314	--	0.573

## Sheet: Supplementary Table 3
Supplementary Table 3. Top CpGs associated with lifetime cannabis use from EWAS in never smokers.
MarkerName	Effect	StdErr	P.value	chr	Direction	HetPVal	pos
cg14237301	-0.0071	0.0013	9.049e-08	chr16	-------?-	0.9093	28506477
cg15613012	-0.0014	0.0003	7.636e-07	chr6	-+-------	0.9845	28887742
cg23220609	-0.008	0.0016	8.239e-07	chr5	?-?????--	0.6195	172670065
cg00958215	0.0005	0.0001	2.133e-06	chr1	+++++++?-	0.1222	176176519
cg01277438	-0.006	0.0013	2.59e-06	chr18	-++------	0.3027	77158471
cg08183916	0.0018	0.0004	3.562e-06	chr2	++-++++++	0.6184	96874535
cg10655021	-0.0023	0.0005	3.588e-06	chr19	+-+------	0.5191	21769430
cg11522767	0.0012	0.0003	4.911e-06	chr6	+-++++++-	0.7304	157342961
cg13772414	-0.0062	0.0014	5.902e-06	chr2	--+------	0.6417	222383060
cg18859248	-0.0055	0.0012	5.989e-06	chr20	------+--	0.7978	60791502
cg17029151	-0.0017	0.0004	6.951e-06	chr8	+-+-----+	0.2138	82644517
cg03596178	-0.0017	0.0004	7.081e-06	chr17	-------+-	0.1298	76138514
cg21161138	-0.0039	0.0009	8.342e-06	chr5	-+-----+-	0.002036	399360
cg14770636	0.0009	0.0002	1.024e-05	chr11	+++++++++	0.9521	134095337
cg17464820	-0.006	0.0014	1.055e-05	chr11	+-+------	0.3056	116838417
cg00120464	0.0016	0.0004	1.1e-05	chr4	++-+++-++	0.759	146842191
cg11498740	-0.0012	0.0003	1.494e-05	chr14	--+------	0.7302	93650664
cg18417061	-0.0027	0.0006	1.823e-05	chr14	--+-----+	0.2405	61972660
cg09848659	-0.0008	0.0002	1.952e-05	chr4	-+------+	0.2829	157892087
cg16415604	0.0005	0.0001	2.034e-05	chr1	++++++++-	0.744	155214575
cg06983715	0.0007	0.0002	2.098e-05	chr1	--+++++-+	0.6278	86042674
cg25318579	-0.0035	0.0008	2.213e-05	chr3	--+--?--+	0.4028	187672350
cg08443019	-0.0017	0.0004	2.334e-05	chr17	-++----+-	0.4104	1946299
cg09588770	0.0053	0.0013	2.667e-05	chr6	?+??????+	0.1029	31324941
cg27414233	0.0001	0	2.673e-05	chr4	++-+++++-	0.3527	84457458
cg04625873	-0.0029	0.0007	2.7e-05	chr11	-------+-	0.2593	118754530
cg10750182	-0.0039	0.0009	2.705e-05	chr10	--------+	0.2593	73497514
cg12046414	-0.0003	0.0001	3.088e-05	chr2	+----+---	0.9725	220379199
cg02725065	-0.0014	0.0003	3.382e-05	chr15	-++----+-	0.1018	101718610
cg14339991	-0.0026	0.0006	3.664e-05	chr3	---------	0.822	11428504
cg03605542	-0.0044	0.0011	3.724e-05	chr5	+-+-----+	0.1439	59929339
cg08308162	-0.0011	0.0003	3.776e-05	chr16	+-------+	0.965	8889244
cg06644428	-0.0051	0.0012	3.811e-05	chr2	--------?	0.091	233284112
cg05741638	-0.0016	0.0004	3.966e-05	chr16	-++----+-	0.6376	90084774
cg21065462	0.0008	0.0002	3.977e-05	chr21	?+?????++	0.007865	44299683
cg00925244	-0.0017	0.0004	3.988e-05	chr2	-?+----??	0.2188	86148800
cg23278060	0.0006	0.0001	4.006e-05	chr6	+++++++?+	0.8429	83777448
cg19802774	-0.0004	0.0001	4.019e-05	chr1	-+-----++	0.1394	109756747
cg12429455	-0.0008	0.0002	4.105e-05	chr2	---+-----	0.8352	61715096
cg24605404	-0.0015	0.0004	4.456e-05	chr12	-++------	0.8881	54450822
cg08491681	-0.0014	0.0004	4.477e-05	chr13	-+---+--+	0.1518	33781288
cg23957118	-0.0004	0.0001	4.609e-05	chr20	--+----?-	0.3884	62200850
cg08070756	-0.0009	0.0002	4.781e-05	chr9	-+-----?+	0.9568	90472252
cg26552734	-0.0009	0.0002	4.785e-05	chr13	-++-----+	0.06475	52988595
cg05316520	-0.0004	0.0001	4.829e-05	chr11	+---?+---	0.7756	61891725
cg15776929	0.0019	0.0005	5.039e-05	chr7	?-???+?++	0.4761	2643444
cg13116946	-0.0019	0.0005	5.139e-05	chr22	??-?--?-+	0.585	38479732
cg15805540	-0.0048	0.0012	5.412e-05	chr6	-?-----+-	0.1158	64286415
cg18819584	0.0031	0.0008	5.589e-05	chr3	?+???+?++	0.2011	156803206
cg01130991	-0.0051	0.0013	5.715e-05	chr17	++-------	0.2173	46510392
cg03990819	-0.0037	0.0009	5.754e-05	chr2	-+------+	0.6748	434332
cg23939844	0.0062	0.0015	5.771e-05	chr12	+++-++++-	0.1326	1930326
cg06325996	-0.0007	0.0002	5.795e-05	chr3	---------	0.1882	10288127
cg08498833	-0.0033	0.0008	5.859e-05	chr8	-+-----+-	0.1304	134003896
cg11588317	-0.0013	0.0003	5.952e-05	chr11	-------?-	0.5788	95837120
cg02264229	-0.0053	0.0013	6.049e-05	chr14	-------?+	0.215	95240560
cg27273140	-0.0008	0.0002	6.152e-05	chr2	+-+----+?	0.8029	74448564
cg27113548	-0.0104	0.0026	6.437e-05	chr14	+--------	0.5124	106354912
cg07131336	-0.0022	0.0005	6.533e-05	chr3	-------+-	0.4347	183995462
cg06872047	-0.0007	0.0002	6.626e-05	chr6	---+---?-	0.5652	29585579
cg15247269	0.0002	0	6.639e-05	chr6	+++++++++	0.6278	31795125
cg13841742	-0.0033	0.0008	6.66e-05	chr4	---+-----	0.1685	48909110
cg13594138	-0.0026	0.0006	6.69e-05	chr15	--+-----+	0.6698	90326828
cg03068843	-0.0038	0.0009	6.938e-05	chr8	------+-+	0.5305	12985953
cg07313956	-0.0019	0.0005	6.945e-05	chr2	+------?-	0.2844	85895360
cg02772619	-0.0015	0.0004	7.032e-05	chr9	+------+-	0.5664	86753573
cg00122854	-0.0045	0.0011	7.193e-05	chr2	---------	0.7516	218898491
cg14258877	-0.0012	0.0003	7.193e-05	chr2	+-----+-+	0.7259	161127827
cg01824412	-0.0011	0.0003	7.28e-05	chr6	---------	0.2461	170405893
cg04414816	-0.001	0.0002	7.37e-05	chr4	--+------	0.9277	8248320
cg24158506	-0.0008	0.0002	7.442e-05	chr19	--+---+--	0.5734	58019025
cg00542975	-0.005	0.0013	7.472e-05	chr2	--+-----+	0.3616	122392291
cg24685071	0.0003	0.0001	7.513e-05	chr2	+++++++--	0.6485	27592886
cg25667998	-0.0025	0.0006	7.549e-05	chr19	++-------	0.3249	56705433
cg18030453	-0.0042	0.0011	7.685e-05	chr3	--------+	0.3561	45506216
cg03318906	-0.0043	0.0011	7.723e-05	chr8	--+----++	0.6784	37755254
cg13443165	-0.0124	0.0031	7.742e-05	chr9	--+------	0.7711	33130375
cg01361777	-0.0112	0.0028	7.845e-05	chr10	?-??????-	0.2742	79629102
cg15613761	-0.0055	0.0014	8.155e-05	chr19	---------	0.6755	46404710
cg07962641	-0.0009	0.0002	8.218e-05	chr8	-------?-	0.225	28805897
cg23455440	-0.0013	0.0003	8.28e-05	chr7	-+-----?+	0.8736	45961508
cg16146177	-0.0001	0	8.351e-05	chr4	+--------	0.5463	41883608
cg23266151	-0.0014	0.0004	8.578e-05	chr14	-+-------	0.4954	102263636
cg01101865	-0.0044	0.0011	8.75e-05	chr14	+--+-----	0.697	62584565
cg01098981	-0.0019	0.0005	8.774e-05	chr13	+--+---+-	0.2767	53602266
cg13791719	-0.0036	0.0009	9.011e-05	chr7	-+-------	0.3595	39994617
cg26532499	-0.0024	0.0006	9.241e-05	chr11	-?-----+-	0.9128	104876060
cg03805357	0.0044	0.0011	9.278e-05	chr10	++++?++?+	0.9184	17259531
cg11734841	-0.0006	0.0002	9.594e-05	chr17	+----+---	0.4482	9963861
cg11886358	-0.006	0.0016	9.745e-05	chr11	---------	0.9919	128561007
cg26872305	-0.0007	0.0002	9.841e-05	chr2	--+------	0.7131	169104523
cg19609438	-0.0079	0.002	9.869e-05	chr8	???????+-	0.1153	100770219
cg00787661	0.0015	0.0004	9.895e-05	chr2	-++-+-+?+	0.03138	232329533
cg04256516	-0.0029	0.0007	9.998e-05	chr9	-+-+----+	0.559	100684122
cg16083447	-0.0006	0.0002	0.0001009	chr2	--+-----+	0.7482	99226287
cg16925459	-0.0082	0.0021	0.0001044	chr7	+?+------	0.1025	18548581
cg21159241	-0.0002	0	0.0001093	chr7	+----+---	0.9687	39662930
cg11191955	-0.0015	0.0004	0.0001104	chr6	+------+-	0.9753	31849272
cg18740893	-0.0008	0.0002	0.0001105	chr3	--+---+-+	0.002596	136538934
cg25919221	-0.0065	0.0017	0.0001124	chr1	-+-------	0.6358	9006680
cg12866859	-0.0027	0.0007	0.0001129	chr17	-------+-	0.8013	43224332
cg01515802	-0.0076	0.002	0.0001145	chr19	?-?????--	0.5126	54876749
cg06590470	0.0006	0.0002	0.0001164	chr9	-++++++-+	0.9048	34523253
cg15132565	-0.0009	0.0002	0.0001187	chr5	-----+--+	0.7438	72740154
cg04175833	-0.0035	0.0009	0.0001187	chr6	-------++	0.805	45634971
cg11707391	-0.0015	0.0004	0.0001188	chr8	--+------	0.7307	10001627
cg06521615	-0.0009	0.0002	0.0001228	chr2	+++------	0.02365	162271801
cg08013923	-0.0018	0.0005	0.0001259	chr17	--+----+-	0.7406	34238169
cg04811762	0.0008	0.0002	0.0001264	chr6	++-+++-++	0.0875	150039439
cg16704246	-0.0036	0.0009	0.0001281	chr10	-----?+++	0.2674	112594670
cg13375262	-0.0014	0.0004	0.0001283	chr7	-+-----++	0.2628	1991782
cg03764274	-0.0046	0.0012	0.0001298	chr17	-+-+---?-	0.2314	79632335
cg04406620	-0.0043	0.0011	0.0001313	chr16	---------	0.5375	69499075
cg10105237	-0.0057	0.0015	0.0001329	chr8	-+-+-----	0.5107	135726091
cg15928188	-0.0034	0.0009	0.0001353	chr7	---------	0.3142	155276437
cg21049487	-0.0041	0.0011	0.0001387	chr12	---------	0.7136	104328065
cg18500830	-0.0021	0.0005	0.0001408	chr10	--------+	0.9921	12395689
cg16354091	-0.0007	0.0002	0.0001417	chr5	-----+---	0.007929	137474830
cg01991967	-0.0032	0.0008	0.0001431	chr2	-+------+	0.02271	113884734
cg08524641	-0.0003	0.0001	0.0001466	chr16	+++------	0.1514	28874937
cg06872176	-0.0025	0.0007	0.0001471	chr1	-+-??-?--	0.9752	68697386
cg16754929	-0.004	0.0011	0.0001474	chr12	+-------+	0.7879	32735744
cg24501831	-0.0039	0.001	0.0001479	chr10	-+-------	0.314	81194777
cg19305934	-0.0004	0.0001	0.0001487	chr9	-+---+--+	0.26	97811087
cg08703950	0.0017	0.0004	0.0001492	chr15	--+++++?-	0.4172	82338222
cg18954047	-0.0017	0.0004	0.0001494	chr6	-+-------	0.713	28889682
cg02695704	-0.0002	0.0001	0.0001495	chr16	-+---+---	0.1867	1250494
cg18891387	0.0008	0.0002	0.0001501	chr19	+-+++++--	0.8309	5903977
cg21356750	-0.0034	0.0009	0.0001512	chr6	-----++-+	0.05221	31864236
cg11500390	-0.0011	0.0003	0.0001527	chr11	+-+----+-	0.6966	64572185
cg12604036	0.0106	0.0028	0.0001529	chr15	?+?????+-	0.8155	25425436
cg13855384	-0.0009	0.0002	0.0001541	chr17	-+++---++	0.5129	7151975
cg13089729	-0.0014	0.0004	0.000156	chr6	------+--	0.5143	36530494
cg02443658	0.0069	0.0018	0.0001577	chr16	-++-+++++	0.3326	28986829
cg01323777	-0.0051	0.0013	0.0001578	chr17	---+----+	0.07167	7832943
cg00346074	0.0058	0.0015	0.0001601	chr10	???????++	0.1525	65252033
cg03092548	0.0003	0.0001	0.0001614	chr14	---++-+-+	0.3065	39736835
cg17886959	-0.0051	0.0014	0.0001619	chr16	---+---++	0.1093	56642024
cg19257832	-0.0066	0.0017	0.0001631	chr11	+--+-----	0.02712	116127307
cg13819485	0.0003	0.0001	0.0001636	chr11	+++++-+++	0.5233	118868642
cg12194745	-0.0047	0.0012	0.0001638	chr17	-------+-	0.3999	79423649
cg01045946	-0.0014	0.0004	0.000164	chr1	+----?--+	0.3746	150980214
cg18028289	-0.0007	0.0002	0.0001644	chr1	-+---+---	0.641	33941835
cg23284323	-0.0004	0.0001	0.0001647	chr21	+++--+---	0.08059	40685679
cg22557662	-0.0012	0.0003	0.0001652	chr19	+--------	0.5425	38747374
cg04271677	-0.0007	0.0002	0.000166	chr7	---------	0.1401	156754681
cg11117177	-0.0016	0.0004	0.0001662	chr12	--+------	0.4569	105106514
cg13131015	-0.0026	0.0007	0.0001664	chr12	+--+---?-	0.5234	14849542
cg20871826	-0.0042	0.0011	0.0001668	chr17	-------?+	0.2564	3790402
cg17577431	-0.0013	0.0003	0.0001678	chr3	-------?+	0.43	175696388
cg12505390	-0.0043	0.0012	0.0001728	chr17	?--------	0.2156	4848355
cg00445475	0.0048	0.0013	0.0001737	chr9	+++-+++++	0.3539	138628673
cg21321735	0.0002	0	0.0001742	chr2	+?--+++?+	0.1017	241760164
cg09033131	-0.0012	0.0003	0.0001743	chr11	-++--++--	0.5508	118135094
cg05013783	0.0003	0.0001	0.0001755	chr12	+-+-+++-+	0.008991	56652058
cg06754445	0.0015	0.0004	0.0001764	chr16	+++++++++	0.8203	10479875
cg24558709	0.0047	0.0013	0.0001788	chr4	???????++	0.7587	104227316
cg13833831	-0.0009	0.0002	0.0001807	chr19	-+------+	0.3661	3802558
cg00797821	-0.0002	0.0001	0.0001809	chr16	-----+---	0.0575	49888944
cg20472500	0.0006	0.0002	0.0001817	chr5	+-++?++++	0.7244	64064258
cg26077392	-0.0008	0.0002	0.0001835	chr14	---+-----	0.4277	56042963
cg01017895	-0.0013	0.0003	0.0001858	chr20	-+-----++	0.4007	388559
cg16113254	-0.0025	0.0007	0.0001863	chr14	--------+	0.6745	75777372
cg09301392	-0.0022	0.0006	0.0001872	chr8	--+-----+	0.9509	66078937
cg05855917	-0.0017	0.0005	0.0001892	chr3	--------+	0.1748	147113700
cg21146037	-0.0009	0.0002	0.0001922	chr8	+--------	0.7882	126450475
cg08431529	-0.001	0.0003	0.000193	chr12	--+---+++	0.4262	6619138
cg09950208	-0.0021	0.0006	0.0001944	chr10	---------	0.4502	130841235
cg15642666	0.0056	0.0015	0.0001958	chr19	+++++++++	0.7625	34174388
cg17116500	-0.0019	0.0005	0.0001969	chr12	--------+	0.8577	56600222
cg21165027	-0.0046	0.0012	0.0001974	chr5	---+-----	0.1262	172663784
cg05708550	0.0015	0.0004	0.0002006	chr5	+-+++++++	0.5525	137688227
cg17781721	-0.0014	0.0004	0.0002008	chr5	-++-----+	0.1148	177697477
cg19695041	-0.0041	0.0011	0.0002012	chr8	-+-------	0.01463	38615330
cg15561235	0.0001	0	0.0002113	chr2	++-+++++-	0.7493	242641384
cg09741592	-0.0039	0.001	0.000214	chr12	--+----+-	0.5975	54676056
cg06573718	0.0002	0	0.0002196	chr12	+?-?++?++	0.761	99038766
cg27267143	-0.0009	0.0002	0.0002208	chr18	+++--++--	0.05844	12995358
cg13812971	-0.0008	0.0002	0.0002219	chr4	-+-------	0.3944	40876725
cg08492625	0.0024	0.0007	0.0002234	chr22	++-+++++-	0.7518	29978158
cg03676485	-0.0045	0.0012	0.0002248	chr7	---+----+	0.4079	2563816
cg25806307	-0.0011	0.0003	0.0002254	chr19	-----+---	0.1307	39466182
cg19230787	-0.0011	0.0003	0.0002283	chr7	+----?--+	0.8346	4049967
cg04430911	-0.004	0.0011	0.0002284	chr1	-----?---	0.6635	36914349
cg10973762	-0.0068	0.0019	0.0002299	chr15	-------+-	0.6826	48625931
cg02643451	-0.003	0.0008	0.0002311	chr8	-+--?----	0.8723	1497878
cg01052291	-0.0009	0.0002	0.0002372	chr6	---------	0.7838	133036573
cg04254690	0.0018	0.0005	0.0002381	chr4	+-+-+++++	0.6817	25031951
cg00552525	-0.0007	0.0002	0.0002386	chr8	--------+	0.1851	142160972
cg25565505	-0.0006	0.0002	0.0002387	chr3	+------+-	0.689	155244042
cg02425140	0.01	0.0027	0.0002419	chr17	+++??+?++	0.07068	259930
cg23988801	0.0011	0.0003	0.0002448	chr5	---+++-++	0.7218	3768181
cg21019662	-0.0014	0.0004	0.0002449	chr12	-+------+	0.4611	107176420
cg19795082	-0.0002	0.0001	0.0002456	chr4	++----++-	0.003654	88312560
cg08608762	-0.0005	0.0001	0.0002462	chr6	-----+---	0.6189	107348430
cg24820672	0.0162	0.0044	0.0002471	chr13	+-++++---	0.4879	112984728
cg04352272	0.0096	0.0026	0.0002479	chr17	++-+++-+-	0.4253	3289798
cg09954723	-0.008	0.0022	0.0002503	chr6	?-?????--	0.3393	28317714
cg14638957	-0.0008	0.0002	0.0002512	chr3	+-+----+-	0.5255	196218787
cg23811512	-0.0016	0.0004	0.0002554	chr13	-+-----+-	0.1244	75928922
cg10393508	-0.0023	0.0006	0.0002567	chr13	+--------	0.5205	50950265
cg15288420	0.001	0.0003	0.0002575	chr10	++-++++++	0.8861	134495625
cg07667813	0.0012	0.0003	0.0002582	chr19	++-++++++	0.1776	7985168
cg18764771	-0.0051	0.0014	0.0002592	chr6	--+----+-	0.06849	116381957
cg00018557	-0.0005	0.0001	0.0002593	chr17	-++------	0.1318	43238884
cg04254242	-0.001	0.0003	0.0002601	chr2	--++-+-+-	0.02105	30482359
cg00047532	-0.0024	0.0007	0.0002608	chr6	--------+	0.3546	42882406
cg20345234	0.0096	0.0026	0.0002625	chr10	--++++++-	0.4251	65801377
cg13580107	-0.0025	0.0007	0.000265	chr18	-++----+-	0.5417	77185451
cg17725472	-0.0024	0.0006	0.0002652	chr1	--+----++	0.81	203198757
cg16385941	-0.0002	0.0001	0.0002663	chr7	--+------	0.1818	1579643
cg23596862	-0.0026	0.0007	0.0002668	chr22	--------?	0.4949	23909533
cg13477164	0.0069	0.0019	0.0002669	chr17	+++??+?++	0.4239	259942
cg19856802	-0.0007	0.0002	0.000268	chr4	+----?---	0.455	165876955
cg21776419	0.0032	0.0009	0.0002683	chr5	-++-+++-+	0.132	81118892
cg15937958	-0.0034	0.0009	0.0002684	chr19	-+------?	0.03234	42947133
cg23434070	-0.0009	0.0003	0.0002706	chr20	---------	0.7374	8243123
cg10487521	-0.0013	0.0004	0.0002723	chr1	---+-+-?+	0.07919	212604918
cg00420808	0.0019	0.0005	0.000273	chr6	+++?+-?++	0.1402	33216383
cg05251676	-0.0005	0.0001	0.0002753	chr5	--+------	0.5191	38258884
cg05001691	-0.0023	0.0006	0.0002754	chr2	-------+-	0.6471	220116179
cg22966391	-0.0015	0.0004	0.0002781	chr7	-++----+-	0.3084	2416675
cg25300234	-0.0028	0.0008	0.0002787	chr2	-?-------	0.2406	212938740
cg16557355	0.0006	0.0002	0.0002792	chr20	---++++++	0.9292	1446937
cg05977900	0.0003	0.0001	0.0002803	chr3	+--++-+++	0.03239	182512126
cg02645287	-0.0011	0.0003	0.0002837	chr16	-++----+-	0.1541	69136656
cg18084114	-0.0011	0.0003	0.0002838	chr1	--+------	0.1295	31197218
cg09135529	-0.0024	0.0007	0.0002848	chr11	-+---?+++	0.08756	62448703
cg16362595	-0.0041	0.0011	0.0002856	chr6	-+------+	0.31	15305678
cg00826203	-0.0042	0.0012	0.0002861	chr1	--+------	0.9518	41706807
cg24747537	-0.0018	0.0005	0.0002879	chr6	-+-----+-	0.9182	33389172
ch.17.71764510F	-0.0006	0.0002	0.0002885	chr17	+---?+-?-	0.2192	74252915
cg07804749	-0.001	0.0003	0.0002909	chr1	---------	0.4545	12610104
cg21572000	-0.001	0.0003	0.0002917	chr14	---------	0.279	69546193
cg01607530	-0.003	0.0008	0.0002941	chr11	--------+	0.4255	1660992
cg17787876	-0.0027	0.0007	0.0002945	chr1	-+-----+-	0.9627	156467057
cg21037362	-0.001	0.0003	0.0002951	chr5	---+-----	0.7706	72876476
cg01158574	0.0026	0.0007	0.0002973	chr2	--+++++-+	0.04081	11809997
cg19585061	0.0071	0.002	0.0002977	chr17	+++??+?++	0.1033	259924
cg23823894	-0.0077	0.0021	0.0003002	chr8	-----?---	0.2278	11471881
cg05955210	-0.0072	0.002	0.0003026	chr5	--+------	0.3156	38846698
cg12783776	-0.0019	0.0005	0.0003029	chr11	+-+------	0.297	57365948
cg04849850	-0.0026	0.0007	0.0003047	chr2	-++----+-	0.1188	86121000
cg05706719	-0.0006	0.0002	0.0003075	chr13	-----+++-	0.4389	31897413
cg13019512	-0.001	0.0003	0.0003077	chr5	-----+---	0.4232	170834565
cg09738947	-0.0018	0.0005	0.0003078	chr15	--------+	0.4732	90608877
cg12873610	-0.0057	0.0016	0.0003082	chr17	---+-?--+	0.008591	27044322
cg24672014	-0.0102	0.0028	0.0003086	chr1	---+---?-	0.5209	37203461
cg04244171	-0.0037	0.001	0.0003106	chr3	-----?---	0.456	43331949
cg15763258	-0.003	0.0008	0.0003116	chr11	-+-----+-	0.2797	128561675
cg13938504	-0.0008	0.0002	0.0003142	chr1	--+--?+--	0.1729	236763796
cg07149267	-0.0006	0.0002	0.0003154	chr8	--+--?---	0.9898	22460373
cg25686812	-0.0018	0.0005	0.0003156	chr3	+----+---	0.4896	42597657
cg00848461	-0.0049	0.0014	0.0003169	chr5	-?---?---	0.1375	176732093
cg02735829	0.0032	0.0009	0.0003176	chr5	+++++++--	0.8975	180167566
cg25653011	0.0007	0.0002	0.0003183	chr17	+-++++++-	0.6634	38296442
cg26405097	-0.0049	0.0014	0.0003198	chr6	---+----+	0.9626	15428301
cg05043716	-0.0014	0.0004	0.0003234	chr8	---------	0.8595	25166343
cg13761440	-0.0012	0.0003	0.0003239	chr11	+++----?-	0.2389	30608165
cg02488422	-0.0022	0.0006	0.0003295	chr11	---+-+---	0.1905	16757705
cg03469086	0.0009	0.0003	0.0003316	chr4	-+++?-+++	0.1171	141073908
cg18175470	-0.0017	0.0005	0.0003333	chr10	++-----++	0.5531	62150864
cg00757033	-0.0104	0.0029	0.0003351	chr12	+?----+--	0.2179	89920650
cg24786176	0.0004	0.0001	0.0003369	chr4	+-+-+++++	0.1968	113153431
cg22882506	-0.003	0.0008	0.0003398	chr10	-------?+	0.6262	106093718
cg08508761	-0.0016	0.0005	0.0003401	chr13	--------+	0.08467	28930547
cg08175536	0.0033	0.0009	0.0003404	chr15	+--++-+++	0.1423	89927750
cg08840018	-0.0012	0.0003	0.0003439	chr19	-++----+-	0.02675	419048
cg14823007	0.0002	0.0001	0.0003484	chr1	++-++++++	0.7969	7831605
cg05203206	-0.001	0.0003	0.000349	chr20	-+---+--+	0.9647	5281174
cg13137458	-0.0006	0.0002	0.0003498	chr11	--+-----+	0.3053	77160347
cg19735457	-0.0005	0.0001	0.0003522	chr20	++-+---?+	0.04016	54937503
cg04797742	-0.0049	0.0014	0.0003528	chr2	------+--	0.1752	45171097
cg14973204	-0.0027	0.0008	0.0003549	chr12	--------?	0.8333	133052753
cg18575740	0.0141	0.004	0.000357	chr4	+++++?++-	0.2987	174457224
cg10838664	-0.0001	0	0.0003572	chr22	+++--+---	0.6088	27068761
cg10062919	-0.0035	0.001	0.0003582	chr17	-------++	0.01785	38503802
cg05158615	0.0029	0.0008	0.0003598	chr7	--+++-+++	0.1362	24323559
cg09284703	-0.0001	0	0.0003619	chr19	++++--+--	0.248	36207534
cg23434459	0.0007	0.0002	0.0003623	chr7	-++++-+++	0.5513	107220583
cg27460040	-0.003	0.0008	0.0003638	chr8	++-------	0.004732	38648995
cg10175795	-0.0057	0.0016	0.0003652	chr10	--+---+?-	0.6855	133109194
cg07861564	-0.0014	0.0004	0.0003666	chr12	+-+---+--	0.08113	119616618
cg23633330	-0.0037	0.0011	0.0003707	chr1	-------+-	0.3829	207510679
cg04936599	-0.0007	0.0002	0.0003713	chr17	+-+----+-	0.5829	1787112
cg16725264	0.0003	0.0001	0.0003721	chr8	++-++++-+	0.4193	145582147
cg00396865	-0.0039	0.0011	0.0003724	chr9	-++----+-	0.0724	139620597
cg13998395	-0.0008	0.0002	0.0003732	chr7	++-+-++?-	0.01898	98553760
cg04003690	-0.0012	0.0003	0.0003746	chr15	---------	0.6769	29905856
cg16030177	-0.0062	0.0017	0.0003757	chr1	--++-----	0.01408	209979111
cg18305855	-0.006	0.0017	0.0003758	chr7	--+-----+	0.8527	112529943
cg09298313	-0.0047	0.0013	0.0003763	chr14	--+---+--	0.7032	55569959
cg13126655	-0.0008	0.0002	0.0003767	chr19	--+----++	0.2745	5997434
cg19353425	-0.0016	0.0004	0.0003869	chr2	--------+	0.8621	69968558
cg14208875	-0.0008	0.0002	0.0003881	chr17	+-------+	0.9819	37417655
cg14315058	0.0003	0.0001	0.0003973	chr8	++++?+++-	0.9364	99182422
cg13249146	-0.0442	0.0125	0.0003985	chr12	-?-?????-	0.03969	132887349
cg20569839	-0.0026	0.0007	0.000399	chr1	-+++---+-	0.2218	109618889
cg20761853	-0.0045	0.0013	0.0004002	chr17	---------	0.9718	76850198
cg04064511	-0.0005	0.0002	0.0004009	chr16	-+++---+-	0.2124	81345203
cg02657833	-0.0028	0.0008	0.0004012	chr10	--+----+-	0.2127	26222248
cg27476456	-0.0051	0.0014	0.0004016	chr19	-----+--+	0.3468	14115967
cg17462962	-0.007	0.002	0.0004033	chr5	-+--+----	0.2885	154347281
cg25847835	0.0011	0.0003	0.0004068	chr5	-++++++-+	0.4037	147763803
cg14851346	0.0015	0.0004	0.0004075	chr12	+++++++?+	0.005802	38532713
cg09740815	-0.0012	0.0003	0.0004082	chr16	---------	0.5785	3777892
cg01857829	-0.0022	0.0006	0.0004092	chr16	--------+	0.6848	68771498
cg06287318	-0.0013	0.0004	0.00041	chr20	+------?-	0.919	21496129
cg15871086	-0.003	0.0008	0.0004152	chr18	-+-------	0.2293	56526595
cg12744858	-0.001	0.0003	0.0004163	chr2	+++----?-	0.7696	128468498
cg22110517	-0.0015	0.0004	0.000424	chr17	-+-+---+-	0.1767	4800583
cg20338754	-0.0055	0.0016	0.0004282	chr18	------+--	0.7268	29677086
cg19813030	0.0003	0.0001	0.0004328	chr13	+++++++++	0.4531	30996374
cg25609954	-0.0014	0.0004	0.0004329	chr4	-++------	0.8814	3472246
cg27400113	-0.0022	0.0006	0.0004332	chr2	++-------	0.4798	66743837
cg10132874	-0.0013	0.0004	0.0004363	chr19	-+-----++	0.3488	3782316
cg22448090	-0.0023	0.0006	0.0004378	chr1	--+---+--	0.5429	200978598
cg08894588	-0.0043	0.0012	0.000438	chr16	-------?-	0.3706	58027941
cg26442397	-0.0052	0.0015	0.0004383	chr3	-----?-++	0.4726	142888303
cg26890621	-0.0014	0.0004	0.0004426	chr11	-------++	0.7282	72982996
cg19226844	-0.0024	0.0007	0.000447	chr13	-------+?	0.1133	21808908
cg25539392	-0.0002	0	0.000448	chr20	++-------	0.1014	34043435
cg14632586	-0.0018	0.0005	0.0004484	chr6	---------	0.4679	19844462
cg13674556	0.0002	0.0001	0.0004526	chr9	+--++?-+-	0.1148	77702836
cg23649140	-0.0053	0.0015	0.0004535	chr8	-------+-	0.9324	37661612
cg12311529	-0.0012	0.0004	0.0004564	chr13	--+------	0.7703	111944449
cg15481583	-0.0072	0.0021	0.0004568	chr1	--------+	0.8256	64620825
cg03742705	-0.0038	0.0011	0.000457	chr1	+-----+--	0.8448	1406266
cg05772155	0.0114	0.0032	0.0004576	chr10	+-++++++-	0.2534	65801432
cg10924776	-0.005	0.0014	0.0004595	chr5	--+-----+	0.8603	36265810
cg00230183	0.0049	0.0014	0.0004596	chr16	-++++++?+	0.1847	88882565
cg22031629	0.0004	0.0001	0.0004629	chr22	+-+-+++++	0.4585	21355869
cg12537619	-0.002	0.0006	0.0004648	chr11	--+------	0.2194	3187923
cg00831672	-0.0003	0.0001	0.0004661	chr7	-------?-	0.488	16437298
cg01869067	0.001	0.0003	0.000467	chr22	--+++++-+	0.09844	46374411
cg15291410	0.0001	0	0.0004672	chr22	-++++++-?	0.4508	20105008
cg02021641	-0.0022	0.0006	0.0004686	chr17	-+-+-----	0.02129	7758692
cg15186869	0.0013	0.0004	0.0004697	chr14	+++++++++	0.9109	93673274
cg02026141	-0.0137	0.0039	0.0004698	chr10	---+----+	0.2893	23492470
cg14896695	0.0005	0.0001	0.0004713	chr10	+++++++++	0.5295	43902999
cg25009327	-0.0043	0.0012	0.0004716	chr7	------+--	0.6399	148820504
cg15173586	-0.0072	0.0021	0.0004728	chr8	--------+	0.8657	124784802
cg09786593	-0.0093	0.0027	0.0004746	chr2	+-+---+--	0.4938	239851298
cg03824114	-0.001	0.0003	0.0004769	chr5	+--------	0.5312	208857
cg01338474	-0.0017	0.0005	0.0004775	chr19	--+----++	0.5764	41782099
cg18754985	-0.0007	0.0002	0.0004795	chr3	-----+---	0.009285	98237750
cg16901082	0.0008	0.0002	0.0004797	chr8	++-++++++	0.851	26435609
cg00081919	-0.0027	0.0008	0.0004822	chr2	-++----++	0.2011	43187471
cg10531711	-0.0016	0.0005	0.0004828	chr6	-?-----+?	0.84	33541689
cg05317956	-0.0011	0.0003	0.0004841	chr10	---------	0.8221	99409824
cg23460369	-0.002	0.0006	0.0004849	chr17	-+------+	0.1925	79260991
cg04559128	0.0009	0.0003	0.0004871	chr2	-++++++?+	0.6508	233470868
cg22260869	-0.0005	0.0002	0.0004892	chr15	+-+------	0.8069	92398112
cg12876517	-0.0009	0.0003	0.0004904	chr2	------+++	0.3233	64089585
cg23508607	0.001	0.0003	0.0004916	chr20	+++++++-+	0.1173	44651368
cg09553840	-0.0033	0.001	0.0004924	chr8	++-------	0.3306	131217021
cg05257635	-0.0006	0.0002	0.0004936	chr13	--+---++-	0.7734	44543954
cg26654770	0.0314	0.009	0.0004945	chr12	-++++++++	0.349	740100
cg19350728	0.0005	0.0001	0.0004955	chr9	-+-++-+++	0.8424	135820526
cg03612683	-0.0027	0.0008	0.000498	chr19	--+----+?	0.09656	43531821
cg21116783	-0.0012	0.0003	0.0004994	chr11	---------	0.1522	61160490
cg22879689	-0.002	0.0006	0.000503	chr7	-++---+-+	0.3258	925143
cg26713043	-0.0009	0.0003	0.0005047	chr3	---------	0.9958	134367093
cg23493787	-0.0027	0.0008	0.0005071	chr8	+--+-----	0.05897	134829084
cg25665606	0.0047	0.0013	0.0005073	chr22	+--+++---	0.4001	50986051
cg07561710	-0.0022	0.0006	0.0005077	chr6	-+-----?+	0.4604	44185239
cg12706662	-0.0007	0.0002	0.0005102	chr7	------+-+	0.6015	133997541
cg06044899	-0.0033	0.0009	0.0005152	chr4	--+------	0.3312	91760229
cg10014112	-0.0004	0.0001	0.00052	chr7	-?+-----+	0.6289	134832844
cg21973517	-0.0001	0	0.0005277	chr3	+?------+	0.03974	11762253
cg08913261	-0.0007	0.0002	0.0005282	chr1	-----?--+	0.7632	156740730
cg22920700	-0.0042	0.0012	0.0005316	chr8	--+----+-	0.4267	99955610
cg23986185	-0.0019	0.0006	0.0005337	chr17	-++------	0.4458	72436456
cg17800426	-0.0007	0.0002	0.0005382	chr5	-+----+--	0.2111	150039573
cg06951627	-0.007	0.002	0.0005387	chr6	-------?-	0.8263	26196580
cg10062316	-0.0023	0.0007	0.0005388	chr4	+------+-	0.8064	88245032
cg25273005	-0.0011	0.0003	0.0005433	chr12	+--------	0.8176	109181848
cg21251230	-0.001	0.0003	0.0005446	chr9	+--------	0.1135	129566665
cg16274205	0.0182	0.0053	0.0005478	chr3	++-+++++-	0.212	94243571
cg05874806	-0.0029	0.0008	0.000551	chr2	--------+	0.9898	102350276
cg03168108	-0.0011	0.0003	0.0005532	chr2	-++-----+	0.5114	51259697
cg20289949	-0.0006	0.0002	0.0005537	chr2	--+------	0.7879	43019614
cg09835867	0.0011	0.0003	0.0005542	chr20	+++++++-+	0.2728	31173147
cg13943355	-0.0009	0.0003	0.0005548	chr15	--------?	0.8817	67470870
cg09258877	-0.001	0.0003	0.0005572	chr2	-+-----++	0.05314	230664097
cg22090404	-0.0051	0.0015	0.0005616	chr13	--------+	0.736	51489972
cg15763899	-0.0054	0.0016	0.0005626	chr11	---------	0.9327	72281327
cg23553385	0.001	0.0003	0.0005641	chr2	+++-+?+++	0.04759	163175143
cg21835021	-0.0006	0.0002	0.0005646	chr3	+--------	0.5836	148805105
cg05165044	0.0007	0.0002	0.0005649	chr4	-++++++--	0.1927	37829008
cg21282549	-0.0006	0.0002	0.0005677	chr19	-----+++-	0.1473	51925128
cg10485278	-0.0022	0.0006	0.0005693	chr7	------+-?	0.8971	1060649
cg26877077	-0.003	0.0009	0.0005709	chr15	+-+--?---	0.5983	55585235
cg08248176	-0.0006	0.0002	0.0005735	chr2	--++-----	0.7174	134949203
cg00760938	-0.0015	0.0004	0.0005752	chr2	---+-+-+-	0.0273	217357159
cg03126177	-0.0011	0.0003	0.000576	chr19	--+---+--	0.4169	12982076
cg12359279	-0.0006	0.0002	0.000577	chr21	+-+------	0.8798	42797953
cg14326805	0.006	0.0017	0.0005781	chr9	++++++++-	0.3527	71737756
cg02004594	-0.0011	0.0003	0.0005784	chr6	--+--+-+-	0.1345	28972434
cg08214245	-0.0021	0.0006	0.000583	chr16	+-----+-+	0.4896	15829296
cg19300632	0.0007	0.0002	0.0005831	chr2	-++++++++	0.8117	55746645
cg04149776	-0.0032	0.0009	0.0005834	chr22	-----?-+-	0.07654	48730185
cg04809904	-0.0014	0.0004	0.0005853	chr2	--------+	0.9219	219231526
cg07337290	-0.0003	0.0001	0.0005875	chr16	+-+------	0.3524	28505320
cg02624332	-0.0025	0.0007	0.0005877	chr3	---------	0.7854	101504465
cg07896667	-0.0043	0.0013	0.0005887	chr12	-------?+	0.8517	1726076
cg02426071	-0.0019	0.0005	0.0005898	chr16	-++------	0.485	30825529
cg01485177	-0.0122	0.0036	0.0005927	chr10	--+---+--	0.00143	42863594
cg03358506	-0.0008	0.0002	0.000598	chr8	+-+------	0.3579	22058702
cg25588740	-0.0013	0.0004	0.0005981	chr3	---------	0.7403	178781898
cg07405771	-0.0011	0.0003	0.0006048	chr3	+++----++	0.3929	124930625
cg13666648	-0.0037	0.0011	0.0006065	chr3	------+?+	0.5861	114238429
cg11500569	-0.0008	0.0002	0.0006083	chr8	+++--?--+	0.8121	1249158
cg07875082	-0.0009	0.0003	0.0006095	chr16	-+------+	0.5084	2795390
cg18123760	-0.0067	0.0019	0.0006098	chr2	+-+-----+	0.03464	3934010
cg07631435	-0.0049	0.0014	0.0006103	chr11	--++----+	0.3016	114043903
cg16642284	-0.0023	0.0007	0.0006122	chr10	+--+-----	0.02942	129535378
cg14257907	-0.0122	0.0036	0.0006128	chr1	?-?????--	0.1884	165853483
cg17587648	-0.0009	0.0003	0.0006155	chr3	--+------	0.4669	173115905
cg08652722	-0.0021	0.0006	0.0006165	chr6	-+-+--+--	0.2785	30542193
cg18576604	0.0087	0.0025	0.0006173	chr6	?????+??+	0.9652	32407515
cg14198450	-0.0067	0.002	0.0006174	chr9	+-+--?+--	0.1457	78759126
cg20518096	0.0038	0.0011	0.0006247	chr7	-++-++++-	0.5196	137760331
cg05855489	0.0036	0.0011	0.0006266	chr10	?+-+?++?+	0.03851	104503620
cg06264347	-0.0013	0.0004	0.0006274	chr3	-++----++	0.2265	51532662
cg17589449	-0.001	0.0003	0.0006274	chr22	-+-----++	0.7101	31588863
cg11233163	-0.0014	0.0004	0.0006284	chr3	---+---+-	0.0191	23955549
cg27017414	-0.0019	0.0006	0.0006303	chr16	-++----+-	0.1213	30788580
cg16825643	-0.0013	0.0004	0.0006342	chr16	-------+-	0.64	88802743
cg00234608	-0.0003	0.0001	0.000635	chr9	-+-+---++	0.6707	139702971
cg20503117	0.0008	0.0002	0.0006355	chr3	-++++++++	0.6136	5164013
cg01182309	0.003	0.0009	0.0006361	chr12	-?+++++++	0.8957	58159692
cg04033718	-0.0014	0.0004	0.0006361	chr16	-------+-	0.8325	4419241
cg06856570	0.0003	0.0001	0.0006398	chr18	+--++++++	0.7722	77202280
cg03851956	0.0218	0.0064	0.0006469	chr11	?+??????+	0.3183	48346680
cg15806158	-0.0021	0.0006	0.0006506	chr15	-------++	0.7844	41059932
cg21604803	-0.001	0.0003	0.0006513	chr19	--+----?-	0.03015	50194662
cg07391141	-0.0034	0.001	0.0006534	chr21	------++-	0.6115	44035034
cg02220053	-0.0008	0.0002	0.0006543	chr13	-++------	0.6873	45491918
cg26474717	-0.0009	0.0003	0.0006551	chr10	---+-----	0.5662	44501318
cg19936157	0.0047	0.0014	0.0006615	chr1	---++++++	0.4082	113287238
cg04292615	-0.0043	0.0013	0.0006633	chr19	---??-??-	0.5368	53290079
cg12020437	0.0004	0.0001	0.000664	chr14	--+++++++	0.666	77924595
cg23078268	-0.002	0.0006	0.0006667	chr10	+++--+---	0.2966	100109635
cg22441683	0.001	0.0003	0.0006667	chr12	-++++++++	0.1346	45609714
cg26783523	0.0006	0.0002	0.0006677	chr19	-++++++--	0.03168	18043562
cg21126692	-0.0015	0.0004	0.0006689	chr6	+-+----+-	0.707	14743444
cg22273427	-0.002	0.0006	0.0006691	chr2	---------	0.4249	127977385
cg01856529	-0.0033	0.001	0.0006697	chr12	-------++	0.4848	54653091
cg12023246	-0.0005	0.0001	0.0006749	chr19	--+------	0.005037	36214912
cg02853115	0.0014	0.0004	0.0006756	chr6	--+-+++-+	0.5792	31122392
cg24923860	-0.0003	0.0001	0.000677	chr5	-----+-+-	0.9308	149765871
cg09132619	-0.0007	0.0002	0.0006787	chr6	---------	0.1116	16576166
cg11011759	-0.0007	0.0002	0.0006829	chr15	---------	0.0675	56758270
cg14990266	-0.0023	0.0007	0.0006832	chr8	---+-+---	0.1324	26178981
cg01827910	-0.0007	0.0002	0.0006854	chr2	---+-+---	0.4441	31441588
cg15738421	-0.0005	0.0001	0.0006862	chr12	-?----+?-	0.9502	2986597
cg03107659	-0.0006	0.0002	0.0006863	chr17	--+------	0.8902	40834984
cg15212295	-0.0026	0.0008	0.0006884	chr17	--+---+--	0.1607	64710687
cg04181189	-0.0023	0.0007	0.0006902	chr11	+--------	0.8848	129817418
cg25803423	-0.0002	0	0.0006904	chr14	+--------	0.09648	23563820
cg16775678	0.0004	0.0001	0.0006938	chr13	+-++++---	0.6537	52158057
cg09781028	-0.0016	0.0005	0.0006944	chr7	-+-------	0.7092	90355905
cg18708502	-0.0016	0.0005	0.0006954	chr13	-+-------	0.2553	21588555
cg11542231	0.0002	0	0.0006976	chr1	++-+++-+-	0.1234	28241192
cg17521037	-0.0009	0.0003	0.0006979	chr4	-------+-	0.2085	8377208
cg21528729	-0.009	0.0026	0.000698	chr7	-?+??-??-	0.5748	155095191
cg18946802	-0.0003	0.0001	0.0006982	chr3	-+-------	0.2754	14220310
cg06012347	-0.0011	0.0003	0.0007039	chr11	-----?---	0.6273	65066368
cg01299779	-0.0009	0.0003	0.0007057	chr19	-++----?+	0.3798	48909481
cg23978242	0.0113	0.0034	0.0007082	chr10	+?+-++-?+	0.8592	530635
cg07966910	0.0004	0.0001	0.0007083	chr2	++++++-+-	0.4575	20866399
cg07834743	0.0071	0.0021	0.0007087	chr5	+-+++++++	0.116	5139610
cg20849378	0.0002	0.0001	0.0007099	chr7	+-++++++-	0.5807	1516084
cg13052887	-0.0023	0.0007	0.0007111	chr2	++-+---+-	0.3117	85664005
cg04152465	-0.0011	0.0003	0.0007131	chr2	+-+--?---	0.1148	129543023
cg26318502	-0.001	0.0003	0.0007158	chr5	--++-----	0.2829	172152291
cg11642298	-0.0043	0.0013	0.0007174	chr3	--+------	0.2388	133193741
cg06985153	-0.0007	0.0002	0.0007185	chr15	---+----+	0.7677	90438687
cg26197530	0.0011	0.0003	0.0007209	chr1	++-++++++	0.4153	210485382
cg21784940	-0.0044	0.0013	0.0007209	chr7	---+-----	0.659	150067807
cg16700555	-0.0018	0.0005	0.0007211	chr19	---+---+-	0.4808	29700860
cg02612712	0.0001	0	0.0007256	chr19	++-++++-+	0.154	3985498
cg24403804	-0.0043	0.0013	0.0007281	chr6	--++-----	0.002164	16805426
cg01167323	-0.0031	0.0009	0.0007317	chr1	---------	0.8042	90284686
cg14514987	-0.0009	0.0003	0.0007317	chr14	--------+	0.01093	73959688
cg19042459	-0.0024	0.0007	0.0007318	chr18	--++---+-	0.1958	49866371
cg19989018	-0.002	0.0006	0.000735	chr12	-------+-	0.6806	51592080
cg01967510	-0.0016	0.0005	0.0007413	chr19	---------	0.9435	59028492
cg09730820	-0.0006	0.0002	0.0007416	chr16	+--------	0.1694	15736852
cg13735018	-0.0022	0.0007	0.0007458	chr6	---------	0.9519	158404121
cg26537894	-0.0005	0.0002	0.0007509	chr1	---------	0.78	10719619
cg13417891	-0.0005	0.0002	0.0007513	chr17	-+-----+-	0.1022	35836996
cg21186098	-0.0053	0.0016	0.0007547	chr8	--+-----+	0.3877	108208344
cg14350545	0.0009	0.0003	0.0007566	chr9	+++++-+++	0.05531	135820463
cg08640498	-0.0029	0.0009	0.0007584	chr12	++-----+-	0.5673	57828515
cg13235761	-0.0034	0.001	0.0007603	chr1	--+--?-+-	0.6266	203561580
cg20620783	-0.001	0.0003	0.0007608	chr11	---------	0.9835	7870238
cg11972626	-0.0006	0.0002	0.000762	chr4	-+---?-?+	0.5189	169330887
cg02034311	0.0088	0.0026	0.0007625	chr13	-++-++++-	0.4898	112547999
cg18612627	0.0028	0.0008	0.0007641	chr12	-+-++++++	0.08346	14135203
cg13451048	-0.002	0.0006	0.000765	chr1	-+-----++	0.8588	44820073
cg09070378	-0.0024	0.0007	0.000769	chr1	-+------+	0.6629	161183762
cg01970407	0.0036	0.0011	0.0007708	chr5	--+++++-+	0.1658	323320
cg04304338	-0.0041	0.0012	0.0007746	chr5	-+-------	0.5175	10595660
cg00435621	-0.0008	0.0002	0.0007747	chr17	-+--?----	0.181	8027830
cg22970435	0.0036	0.0011	0.0007755	chr6	++-++++++	0.6434	44310228
cg06943912	-0.0032	0.001	0.0007763	chr19	------+-?	0.1063	10715612
cg14624207	-0.0046	0.0014	0.0007808	chr11	--+--?---	0.1482	68142198
cg03860853	-0.0018	0.0005	0.0007816	chr12	++-----+-	0.1937	120647948
cg06927324	0.0009	0.0003	0.0007822	chr14	+++-+-+++	0.2793	74111701
cg15798455	0.0024	0.0007	0.0007841	chr3	+++++++++	0.2248	71833907
cg06380449	0.0033	0.001	0.0007848	chr17	+++++?++-	0.8003	73255012
cg17825070	-0.0008	0.0003	0.000785	chr15	++------+	0.05837	79614659
cg11384427	-0.0034	0.001	0.0007871	chr12	-------?+	0.4738	6553585
cg22499893	-0.0178	0.0053	0.0007886	chr1	?---??-??	0.8618	24307535
cg14971718	-0.0024	0.0007	0.0007926	chr6	-+-------	0.6436	30175327
cg23173301	-0.0011	0.0003	0.0007935	chr11	-----?-+-	0.9194	6648675
cg11529807	-0.0008	0.0002	0.0007982	chr1	---+---+-	0.3977	76186078
cg02479744	-0.0008	0.0003	0.0007984	chr6	-++--+--+	0.7714	16303089
cg01235659	-0.0037	0.0011	0.000799	chr5	------+--	0.02395	16738047
cg05096161	-0.003	0.0009	0.000802	chr17	--++---?+	0.001124	46114674
cg07735998	-0.0066	0.002	0.0008022	chr8	-?-+-----	0.3601	59789984
cg14180502	0.0001	0	0.0008028	chr9	---+-++++	0.3618	6758546
cg26105658	-0.0008	0.0003	0.000807	chr17	-----?---	0.1987	80651684
cg07012062	-0.0008	0.0002	0.0008081	chr11	--------+	0.8823	76831780
cg00652264	0.001	0.0003	0.0008137	chr14	-++++++++	0.01185	53619311
cg12118784	-0.0031	0.0009	0.0008144	chr19	-++-----?	0.7329	47141551
cg01618719	-0.0012	0.0004	0.0008154	chr12	-+-----?-	0.1318	131366711
cg06199058	-0.0004	0.0001	0.0008165	chr16	+------+-	0.3074	84001784
cg16706099	0.0182	0.0054	0.000819	chr11	?+?????++	0.008314	100590197
cg10374499	-0.003	0.0009	0.0008273	chr11	-+------+	0.4489	44601397
cg06113534	0.0004	0.0001	0.0008313	chr8	--+-++++-	0.4557	120867912
cg07839742	-0.0014	0.0004	0.0008333	chr6	-+-------	0.9945	84761960
cg23075480	-0.001	0.0003	0.0008343	chr5	--------+	0.7413	177890603
cg18743793	-0.0052	0.0016	0.0008429	chr7	-----?---	0.1909	50464661
cg03628682	0.0005	0.0002	0.0008443	chr5	-++++++++	0.5957	72921796
cg11908557	0.0005	0.0001	0.0008448	chr6	+++-+-+++	0.3771	143268469
cg25612145	-0.0006	0.0002	0.0008448	chr7	--+---+--	0.191	23749639
cg08312149	-0.0035	0.0011	0.0008457	chr19	--------?	0.2165	4475055
cg14424499	-0.0007	0.0002	0.0008461	chr1	-+----+--	0.2479	151814634
cg00269996	-0.0017	0.0005	0.0008463	chr6	---------	0.952	42979961
cg04738827	-0.0023	0.0007	0.0008466	chr2	-------?+	0.1005	85839650
cg12056501	-0.0012	0.0004	0.0008491	chr7	+?-?--?+-	0.6458	142576211
cg04944931	-0.0172	0.0051	0.0008499	chr10	+--??-?--	0.6348	76996462
cg26164681	-0.0001	0	0.0008516	chr7	++---+---	0.8806	128828585
cg18198999	0.0013	0.0004	0.0008527	chr1	--++++-+-	0.1005	50890153
cg12184012	-0.0015	0.0004	0.0008563	chr5	+----?+??	0.7143	801195
cg04110224	-0.0045	0.0013	0.0008599	chr11	---??-?-+	0.4868	70508463
cg13647978	-0.0013	0.0004	0.0008622	chr9	-----+--+	0.4661	117136408
cg14565781	-0.0062	0.0019	0.0008648	chr1	-----?---	0.7635	45274513
cg18036573	0.0003	0.0001	0.0008663	chr7	+?+-++-+-	0.4761	92219856
cg27483007	0.0111	0.0033	0.0008693	chr12	-++++++?+	0.9145	132690643
cg04730866	-0.0038	0.0011	0.0008797	chr3	-?+----++	0.1631	97158366
cg19498844	-0.0005	0.0001	0.0008797	chr21	-+-----?-	0.9526	46707878
cg22928405	-0.0005	0.0002	0.0008798	chr3	-++--+--+	0.6048	127523174
cg23576723	-0.001	0.0003	0.0008811	chr10	--------+	0.3792	105206636
cg23640903	0.0022	0.0006	0.0008837	chr6	-++++++?-	0.02835	13487662
cg03293697	-0.0006	0.0002	0.0008839	chr19	+-+--?--?	0.6385	12146639
cg18108513	-0.0013	0.0004	0.0008842	chr4	+------+-	0.07749	8355043
cg19688837	-0.0044	0.0013	0.0008848	chr1	--+----?-	0.00275	3644801
cg06958535	-0.0034	0.001	0.000885	chr1	--+----++	0.1936	203734478
cg18469103	-0.0005	0.0002	0.0008854	chr3	--+-----+	0.2333	120068673
cg19007200	-0.0004	0.0001	0.0008857	chr13	+------?-	0.7836	24553899
cg27318546	-0.0003	0.0001	0.000886	chr18	-+-----+-	0.2528	48345906
cg02256576	-0.0051	0.0015	0.0008879	chr16	--------+	0.8919	66995192
cg14665716	-0.0003	0.0001	0.0008883	chr19	+--+-+---	0.2484	12146509
cg14567260	-0.0028	0.0008	0.0008888	chr5	-?+----+-	0.03307	60346051
cg27579313	-0.0075	0.0023	0.0008906	chr17	--?----+-	0.9463	7381622
cg14960007	-0.0009	0.0003	0.0008957	chr8	-------+-	0.09654	100903122
cg22654935	-0.0009	0.0003	0.0008969	chr19	--------?	0.9226	33621645
cg14358088	-0.0052	0.0016	0.000898	chr6	-------+-	0.2813	2063957
cg03750367	0.0069	0.0021	0.0008989	chr9	-+++?++??	0.8957	124263631
cg11068517	-0.0012	0.0004	0.0009052	chr14	-----+---	0.5771	24741710
cg15391807	-0.0013	0.0004	0.0009065	chr10	--+--?--+	0.3746	118972582
cg16340030	-0.0015	0.0004	0.0009076	chr11	-+-+---+-	0.7644	59554873
cg03870329	-0.0016	0.0005	0.0009081	chr7	---------	0.7854	155085773
cg10172165	0.0002	0.0001	0.0009082	chr7	+-+++++++	0.6834	154982472
cg05292404	0.0047	0.0014	0.0009092	chr10	++-++?+--	0.09794	73149975
cg15068132	0.0014	0.0004	0.0009098	chr12	-+-++++?+	0.2641	102092402
cg17347593	-0.0008	0.0002	0.00091	chr7	+-+--?+--	0.3545	155577749
cg23293999	-0.0009	0.0003	0.0009118	chr7	-------++	0.04638	106826042
cg25003924	-0.0036	0.0011	0.0009123	chr15	---------	0.534	52861754
cg23584871	0.0009	0.0003	0.0009129	chr14	-++++++++	0.04953	100122443
cg02916809	0.001	0.0003	0.0009147	chr4	-++++++++	0.3032	1003208
cg13666041	-0.0042	0.0013	0.0009155	chr14	-----?---	0.9379	69442697
cg15460516	0.0003	0.0001	0.0009167	chr16	++++++++-	0.8294	3070249
cg22505006	-0.0044	0.0013	0.0009173	chr1	-++----+-	0.2228	154981829
cg22443510	-0.0031	0.0009	0.000919	chr7	---------	0.8719	73062083
cg21035511	-0.0018	0.0005	0.0009203	chr6	--------+	0.7047	135318509
cg00986133	-0.0066	0.002	0.0009208	chr10	+--------	0.9266	78647640
cg15628956	-0.0002	0.0001	0.0009219	chr12	+++------	0.5487	53448234
cg01361261	-0.0004	0.0001	0.0009225	chr10	--+------	0.8413	436604
cg21074190	-0.0007	0.0002	0.0009232	chr12	--------+	0.6797	56365823
cg02014014	-0.0009	0.0003	0.0009242	chr8	-++----?-	0.7411	42546904
cg07158658	0.0006	0.0002	0.000927	chr21	-+-+++++-	0.5115	47822105
cg01472363	-0.0016	0.0005	0.0009294	chr2	+++---++-	0.376	95847301
cg03032180	-0.0021	0.0006	0.0009306	chr3	---------	0.113	194979346
cg14605874	-0.0038	0.0012	0.0009353	chr6	---+--+--	0.06608	100915395
cg07624612	0.002	0.0006	0.0009361	chr15	++-+++++?	0.993	83312439
cg08360511	-0.0006	0.0002	0.0009374	chr11	+-------+	0.7402	61322922
cg24158452	0.0004	0.0001	0.0009374	chr17	+-+++-+++	0.4112	40428550
cg01789463	-0.001	0.0003	0.0009416	chr5	--++---+-	0.4143	177031478
cg23675587	-0.0008	0.0002	0.0009425	chr14	--+----++	0.05816	68925902
cg07719786	-0.0007	0.0002	0.0009431	chr1	-+-------	0.1225	159785918
cg16337574	-0.001	0.0003	0.0009444	chr12	+++------	0.3144	56109265
cg07158495	-0.0014	0.0004	0.0009464	chr5	+-++-+---	0.1311	130495016
cg12690127	-0.0002	0.0001	0.0009486	chr12	---------	0.0103	7055683
cg13300580	-0.0032	0.001	0.0009501	chr1	+------+-	0.6418	27440539
cg20406747	-0.0009	0.0003	0.0009562	chr12	-------++	0.1655	53825018
cg03017653	-0.0003	0.0001	0.0009569	chr1	-----?+-+	0.5859	231115871
cg24070823	-0.001	0.0003	0.0009573	chr2	--------?	0.1346	87305913
cg12280407	0.0006	0.0002	0.0009598	chr13	+++++++-+	0.8701	77460322
cg01002381	0.0009	0.0003	0.000967	chr14	+++++++++	0.7582	37131329
cg04220298	0.0012	0.0003	0.0009698	chr11	-++++++++	0.3005	73587932
cg05034471	-0.0016	0.0005	0.000972	chr16	--+------	0.5492	30034801
cg00922157	-0.0099	0.003	0.0009734	chr8	+-+------	0.01269	1117323
cg21906866	-0.0006	0.0002	0.0009743	chr14	-+-------	0.7362	91592679
cg04396791	-0.0046	0.0014	0.0009748	chr11	---??-?-+	0.3472	70508180
cg06709952	-0.0006	0.0002	0.0009766	chr22	-+---?---	0.3886	50493181
cg06717841	0.0012	0.0004	0.0009821	chr1	-++++++++	0.624	40349329
cg25889918	-0.0045	0.0014	0.000983	chr2	-----?---	0.663	179916184
cg09255748	-0.0021	0.0006	0.0009838	chr19	++-------	0.907	40004995
cg23245800	-0.0002	0.0001	0.0009849	chr17	-+-+-----	0.856	26671563
cg11555067	-0.0046	0.0014	0.0009851	chr2	--+-----+	0.4819	99081350
cg09386971	-0.0014	0.0004	0.0009872	chr8	--++-----	0.4137	82644505
cg08239297	-0.0019	0.0006	0.0009904	chr19	------++-	0.6088	14516545
cg24183575	-0.0012	0.0003	0.000993	chr3	-+-------	0.05306	49497929
cg25402049	-0.0037	0.0011	0.0009937	chr1	-+---?---	0.3547	14029875
cg15933546	-0.0004	0.0001	0.0009939	chr6	+-+--?++-	0.7771	38690854
cg04581753	-0.0004	0.0001	0.0009944	chr21	---------	0.6237	43429161
cg17580261	-0.0014	0.0004	0.0009961	chr11	-?---+---	0.9216	76998501
cg07679230	-0.0011	0.0003	0.0009963	chr19	+++----+-	0.1356	3586905
ch.6.94639249R	0.0015	0.0004	0.0009974	chr6	--??+??-+	0.1421	94582528

## Sheet: Supplementary Table 4
Supplementary Table 4. Replication of previous EWAS results for cannabis use.
Nominally significant CpGs (P<1e-5) identified in Markunas, et al. paper for lifetime cannabis use (n=7, Bonferroni correction p-value=0.05/7=0.007).
CpG	Gene	phenotype	Original paper		EWAS model 2		Reference	Sample size
			BETA	P-value	Effect	P.value
cg15973234	KIAA1199	lifetime cannabis use (ever vs. never)	-0.00805494	3.31554e-08	-0.0027	0.006986	Markunas, et al.	2583
cg17024593			-0.0112866	3.56024e-06	-0.0054	0.0001185
cg17464820	SIK3		-0.00727223	2.46011e-06	-0.0042	8.475e-06
cg16516691	ZSWIM2		-0.00202085	9.42781e-06	-0.0011	0.004655
cg13898357	C9orf150		-0.00123177	1.54465e-06	-0.0007	0.0004719
cg27076525	HPSE		0.000807227	3.82241e-06	0.0007	7.545e-06
cg05096161	MIR152;COPZ2		-0.00379902	8.80222e-06	-0.0021	0.0008386
Top 15 CpGs identified in Osborne, et al. paper for cannabis-only users vs controls (n=15, Bonferroni correction p-value=0.05/15=0.003).
CpG	Gene	phenotype	Original paper		EWAS in never smokers		Reference	Sample size
			BETA	P-value	Effect	P.value
cg12803068	MYO1G	cannabis-only users vs controls	0.1	6.30E−07	0.0065	0.04015	Osborne, et al.	72
cg02234936	ARHGEF1		0.01	1.10E−06	0.0028	0.2628
cg01695406	TMEM190		0.05	3.00E−06	-0.0009	0.5486
cg24875484	MUCL3		0.01	3.90E−06	0.0001	0.8716
cg05009104	MYO1G		0.05	5.90E−06	0.0119	0.00256
cg00470351	CDC20		0.02	6.10E−06	-0.0057	0.07825
cg24060040	DUS3L		0.03	6.30E−06	-0.0004	0.7916
cg12322720	FOXB1		0.06	8.90E−06	0.0044	0.7048
cg16746471	KIAA1324L		0.02	1.10E−05	0.0001	0.8021
cg04180046	MYO1G		0.04	1.20E−05	0.0024	0.3578
cg06955687	DDX25		0.04	1.20E−05	0.0083	0.1556
ch.22.707049R	TNRC6B		0.01	1.30E−05	-0.0002	0.1521
cg09344183	SP9		0.01	1.40E−05	-0.0003	0.3405
cg06693983	TMEM190		0.08	1.40E−05	0.0029	0.3861
cg26069230	ADAP2		0.01	1.50E−05	0.0007	0.5034
Top 15 CpGs identified in Osborne, et al. paper for cannabis with tobbaco users vs controls (n=15, Bonferroni correction p-value=0.05/15=0.003).
CpG	Gene	phenotype	Original paper		EWAS model 1		Reference	Sample size
			BETA	P-value	Effect	P.value
cg05575921	AHRR	cannabis with tobacco users vs controls	−0.24	1.40E−11	-0.015	9.851e-23	Osborne, et al.	72
cg21566642	ALPG		−0.17	9.90E−11	-0.0226	1.762e-36
cg03636183	F2RL3		−0.09	2.60E−09	-0.014	7.533e-24
cg01940273	ALPG		−0.09	3.60E−08	-0.0167	1.806e-37
cg17739917	RARA		−0.1	5.60E−08	-0.0382	1.928e-20
cg01541424	LINC02393		0.04	6.30E−07	0.0048	0.002772
cg12828729	TIFAB		0.06	7.10E−07	0.0041	9.063e-05
cg10148067	MTFR1		0.02	7.70E−07	-0.0002	0.6943
cg14391737	PRSS23		−0.06	9.60E−07	-0.0212	1.204e-07
cg07219494	TENM2		−0.05	1.40E−06	-0.0021	0.1628
cg05723029	PIEZO2		0.05	1.50E−06	0.004	0.007567
cg03329539	ALPG		−0.05	3.20E−06	-0.0102	4.98e-22
cg24994593	LDLRAD3		0.02	4.20E−06	0.0003	0.2398
cg25009999	LINC01168		0.01	5.60E−06	0	0.9785
cg13957017	TTLL6		0.03	7.30E−06	-0.0015	0.2779
Top 10 CpGs identified in Nannini, et al. paper for recent cannabis use at Year 15 (n=10, Bonferroni correction p-value=0.05/10=0.005).
CpG	Gene	phenotype	Original paper		EWAS model 2		Reference	Sample size
			BETA	P-value	Effect	P.value
cg18110140	–	Y15 Recent use	−1.10E−02	7.39E−09	-0.0144	3.037e-05	Nannini, et al.	1023
cg21171274	MYO5C		−3.81E−03	7.75E−09	-0.0021	0.09025
cg17218147	SCN11A		−5.11E−03	1.88E−08	0.0041	0.01663
cg12438576	NOX4		8.91E−03	3.28E−08	-0.0002	0.8468
cg15627771	MYO1B		−4.91E−03	9.50E−08	-0.0002	0.9176
cg18880190	BMF		−5.01E−03	1.01E−07	-0.001	0.3746
cg19857151	LYST		5.66E−03	1.91E−07	0	0.9585
cg13444775	SIAE		−1.29E−02	2.30E−07	-0.0008	0.5632
cg05575921	AHRR		−3.37E−02	3.38E−07	-0.0023	0.1004
cg15607642	BEND3		5.62E−03	3.57E−07	0.0002	0.3806
Top 10 CpGs identified in Nannini, et al. paper for cumulative cannabis use at Year 15 (n=10, Bonferroni correction p-value=0.05/10=0.005).
CpG	Gene	phenotype	Original paper		EWAS model 2		Reference	Sample size
			BETA	P-value	Effect	P.value
cg05575921	AHRR	Y15 Cumulative use	−8.51E−02	1.18E−09	-0.0023	0.1004	Nannini, et al.	1023
cg18880190	BMF		−1.30E−02	2.00E−08	-0.001	0.3746
cg07064251	PLEKHH2		1.26E−02	6.89E−08	-0.0009	0.003979
cg23932689	FAM222A		1.52E−02	7.95E−08	0.0006	0.7408
cg25189904	GNG12		−3.81E−02	8.16E−08	-0.0048	0.01173
cg13179084	MED13L		1.34E−02	9.46E−08	-0.001	0.5464
cg06326914	ZNF770		1.73E−02	1.10E−07	0	0.8431
cg12510044	MAPK1		−1.40E−02	1.82E−07	-0.0007	0.7011
cg18387338	–		−2.01E−02	2.08E−07	-0.0019	0.313
cg04742550	ITGAX		−2.98E−02	2.12E−07	0.0001	0.811
Top 10 CpGs identified in Nannini, et al. paper for recent cannabis use at Year 20 (n=10, Bonferroni correction p-value=0.05/10=0.005).
CpG	Gene	phenotype	Original paper		EWAS model 2		Reference	Sample size
			BETA	P-value	Effect	P.value
cg21161138	AHRR	Y20 Recent use	−9.22E−03	3.33E−10	-0.0029	0.0001731	Nannini, et al.	883
cg05575921	AHRR		−3.41E−02	3.57E−09	-0.0023	0.1004
cg06581729	PPP1CB		4.11E−05	9.61E−09	-0.0016	0.3666
cg26867465	–		4.03E−03	1.40E−08	0.0003	0.607
cg01372788	GTF2H3		1.04E−03	3.84E−08	-0.0009	0.008087
cg19569686	MEX3D		1.18E−03	7.89E−08	-0.0007	0.22
cg17456749	FAM109A		−1.58E−03	8.06E−08	0.0001	0.2151
cg00761236	LINC00443		−1.72E−03	8.80E−08	0.0007	0.3859
cg09607178	NCRNA00171		1.95E−03	1.06E−07	0.0078	0.2673
cg02337960	C19orf62		−7.34E−04	1.66E−07	0.0001	0.3242
Top 10 CpGs identified in Nannini, et al. paper for cumulative cannabis use at Year 20 (n=10, Bonferroni correction p-value=0.05/10=0.005).
CpG	Gene	phenotype	Original paper		EWAS model 2		Reference	Sample size
			BETA	P-value	Effect	P.value
cg05575921	AHRR	Y20 Cumulative use	−6.94E−02	5.00E−09	-0.0023	0.1004	Nannini, et al.	883
cg21161138	AHRR		−2.15E−02	2.17E−08	-0.0029	0.0001731
cg09040721	TFEB		5.42E−03	2.63E−08	-0.0006	0.05475
cg13552867	KCNJ9		−9.97E−03	8.81E−08	0.0001	0.697
cg09825346	DUSP12		1.23E−02	1.34E−07	NA	NA
cg21263605	POGK		6.78E−04	3.75E−07	-0.0003	0.251
cg26003997	PHF2		−1.23E−03	4.13E−07	-0.0001	0.6118
cg24976193	–		−1.22E−02	4.24E−07	0.0031	0.06199
cg00785657	ZNF302		1.38E−03	4.24E−07	0.0001	0.2372
cg02646643	PSMD2		2.24E−03	4.71E−07	0.0006	0.6251

## Sheet: Supplementary Table 5
Supplementary Table 5. Variance of lifetime cannabis use explained by DNA methylation score (MS) in the Sister Study.
Dataset	Model	MS cutoff	#CpGs	Beta	SE	P	R2	R2%*
All participants (N=9,436)	LCU ~ MS + EWAS model 1 covariates*	P<10-1	47395	0.309	0.0491	2.89e-10	0.02	0.02
		P<10-3	1428	0.338	0.0492	6.37e-12	0.0241	0.0241
		P<10-5	241	0.393	0.0487	7.78e-16	0.0341	0.0341
		P<10-7	95	0.422	0.051	1.28e-16	0.0355	0.0355
		P<10-9	50	0.427	0.0502	1.71e-17	0.0379	0.0379
		P<10-11	29	0.403	0.0483	6.97e-17	0.0359	0.0359
		P<10-13	27	0.397	0.0479	1.18e-16	0.0353	0.0353
		P<10-15	16	0.383	0.0477	1.01e-15	0.0331	0.0331
		P<10-17	11	0.37	0.0472	5e-15	0.0313	0.0313
		P<10-19	6	0.355	0.0471	5.22e-14	0.0288	0.0288
	LCU ~ MS + EWAS model 2 covariates	P<10-1	45554	0.294	0.106	0.00584	0.00285	0.0029
		P<10-3	537	0.0637	0.0564	0.259	0.00062	0.00062
		P<10-4	74	0.0333	0.0477	0.485	0.00034	0.00034
		P<10-5	5	0.203	0.0884	0.0217	0.00577	0.0058
		P<10-7	1	0.152	0.075	0.043	0.00092	0.00092
Never smokers (N=4,146)	LCU ~ MS + EWAS model 1 covariates	P<10-1	47395	0.321	0.0808	7.17e-05	0.0142	0.0142
		P<10-3	1428	0.277	0.0915	0.00248	0.0081	0.0081
		P<10-5	241	0.411	0.111	0.000203	0.0121	0.0121
		P<10-7	95	0.383	0.118	0.00115	0.0089	0.0089
		P<10-9	50	0.389	0.12	0.00119	0.00912	0.0091
		P<10-11	29	0.354	0.117	0.00246	0.00771	0.0077
		P<10-13	27	0.345	0.117	0.00311	0.0073	0.0073
		P<10-15	16	0.294	0.107	0.00583	0.00619	0.0062
		P<10-17	11	0.249	0.102	0.015	0.00478	0.0048
		P<10-19	6	0.215	0.103	0.0368	0.00342	0.0034
	LCU ~ MS + EWAS model 2 covariates	P<10-1	45554	0.316	0.145	0.03	0.00504	0.005
		P<10-3	537	0.0559	0.0766	0.465	0.00069	0.0007
		P<10-4	74	0.0171	0.0646	0.792	0.00011	0.0001
		P<10-5	5	0.372	0.125	0.00281	0.00893	0.0089
		P<10-7	1	0.195	0.104	0.0602	0.00306	0.0031
* LCU: Lifetime Cannabis Use; MS: Methylation Score; R2%: variance explained by score in percentages

## Sheet: Supplementary Table 6
Supplementary Table 6. Top 50 CpGs associated with lifetime cannabis use from EWAS meta-analysis excluding Sister Study using Model 1 in DNA methylation score (MS) construction.
MarkerName	Effect	StdErr	P.value	chr	Direction	pos
cg08709672	-0.0069	0.001	3.955e-13	chr1	----+----	206224334
cg09935388	-0.0194	0.0024	5.015e-16	chr1	----+----	92947588
cg21913886	-0.0045	0.0007	7.783e-10	chr1	----+----	15485346
cg20295214	-0.0051	0.0008	1.569e-11	chr1	----+----	206226794
cg25189904	-0.0174	0.0021	9.258e-17	chr1	----+----	68299493
cg00542975	-0.0055	0.0009	4.544e-10	chr2	---------	122392291
cg01940273	-0.0176	0.0016	1.777e-29	chr2	----+----	233284934
cg03329539	-0.01	0.0012	8.449e-17	chr2	----+---?	233283329
cg27241845	-0.0087	0.0013	3.444e-11	chr2	---------	233250370
cg21566642	-0.021	0.002	5.903e-26	chr2	----+----	233284661
cg06644428	-0.0084	0.001	1.317e-18	chr2	--------?	233284112
cg19859270	-0.0032	0.0004	5.199e-19	chr3	---------	98251294
cg18754985	-0.0017	0.0003	8.673e-10	chr3	---------	98237750
cg02657160	-0.0033	0.0005	1.129e-11	chr3	---------	98311063
cg21161138	-0.0166	0.0013	1.363e-36	chr5	----+----	399360
cg05575921	-0.0173	0.0022	6.045e-15	chr5	----+----	373378
cg26703534	-0.0126	0.0014	1.701e-18	chr5	--?-+----	377358
cg17287155	-0.0054	0.0007	6.361e-15	chr5	---?+----	393347
cg01899089	-0.0085	0.0011	2.211e-14	chr5	---------	369969
cg11902777	-0.0044	0.0006	5.901e-15	chr5	----+----	368843
cg23916896	-0.0111	0.0015	3.762e-14	chr5	---------	368804
cg04551776	-0.0087	0.001	1.586e-18	chr5	---?-----	393366
cg25648203	-0.0103	0.0011	4.898e-22	chr5	---------	395444
cg11554391	-0.0046	0.0007	8.312e-10	chr5	----+----	321320
cg24859433	-0.0047	0.0007	2.94e-11	chr6	---++----	30720203
cg14753356	-0.0102	0.0014	5.481e-14	chr6	----+----	30720108
cg15342087	-0.005	0.0006	1.504e-14	chr6	---------	30720209
cg12803068	0.016	0.0025	9.605e-11	chr7	++++-++++	45002919
cg21322436	-0.0074	0.0009	1.418e-15	chr7	----+----	145812842
cg24838345	-0.0061	0.001	1.183e-10	chr8	-+--+---+	125737353
cg27460040	-0.0043	0.0007	7.187e-10	chr8	-+--+----	38648995
cg25305703	-0.0099	0.0016	3.71e-10	chr8	---------	128378218
cg01692968	-0.0097	0.0015	1.161e-10	chr9	-+--+---+	108005349
cg10750182	-0.0071	0.0008	8.861e-21	chr10	----+----	73497514
cg14624207	-0.0102	0.0012	2.06e-16	chr11	--?-+----	68142198
cg11660018	-0.01	0.0011	4.046e-19	chr11	----+----	86510915
cg21611682	-0.0062	0.001	2.152e-10	chr11	----+----	68138269
cg23771366	-0.0075	0.0011	1.789e-11	chr11	---------	86510998
cg20059012	-0.0097	0.0015	6.504e-11	chr12	-----?---	53613154
cg21733098	-0.0127	0.002	1.567e-10	chr12	----+---+	127931219
cg07986378	-0.0089	0.0014	2.074e-10	chr12	----+---+	11898284
cg05284742	-0.0071	0.0008	1.963e-20	chr14	----+----	93552128
cg05875421	-0.0048	0.0007	1.768e-11	chr14	----+----	91709951
cg23161492	-0.0096	0.0015	2.005e-10	chr15	---------	90357202
cg07251887	-0.0072	0.001	1.602e-12	chr17	---------	73641809
cg19572487	-0.0105	0.0014	3.865e-14	chr17	-----+---	38476024
cg10062919	-0.0044	0.0007	2.171e-10	chr17	---------	38503802
cg03636183	-0.0166	0.0021	9.983e-15	chr19	--?-+----	17000585
cg15159987	-0.0078	0.001	5.722e-16	chr19	----+----	17003890
cg07339236	-0.0054	0.0007	2.915e-14	chr20	----+----	50312490

## Sheet: Supplementary Table 7
Supplementary Table 7. Correlation between CpG probes and nearby genes from EWAS Atlas.
probe	gene	location	Cor*	P*	tissue	source	gene_symbol
cg01101459	ENSG00000227630	body	0.121	0.003881	brain	TCGA-GBM,TCGA-LGG	LINC01132
cg00813162	ENSG00000072110	body	-0.135	0.001218	brain	TCGA-GBM,TCGA-LGG	ACTN1
cg00813162	ENSG00000072110	body	-0.592	1.08e-62	kidney	TCGA-KIRP,TCGA-KIRC,TCGA-KICH	ACTN1
cg00813162	ENSG00000072110	body	-0.2	6.2e-05	liver	TCGA-LIHC	ACTN1
cg00813162	ENSG00000072110	body	-0.159	0.00402	stomach	TCGA-STAD	ACTN1
cg00813162	ENSG00000072110	body	-0.256	0.002708	testis	TCGA-TGCT	ACTN1
cg14237301	ENSG00000184730	body	-0.389	4.78e-22	brain	TCGA-GBM,TCGA-LGG	APOBR
cg14237301	ENSG00000188603	body	-0.314	1.25e-06	colon	TCGA-COAD	CLN3
cg14237301	ENSG00000184730	body	-0.661	4.42e-30	colon	TCGA-COAD	APOBR
cg14237301	ENSG00000184730	body	-0.389	6.82e-25	kidney	TCGA-KIRP,TCGA-KIRC,TCGA-KICH	APOBR
cg14237301	ENSG00000184730	body	-0.281	2.51e-07	stomach	TCGA-STAD	APOBR
cg14237301	ENSG00000188603	body	-0.222	0.009495	testis	TCGA-TGCT	CLN3
* The pearson correlations between DNA methylation and expression data in six tissues (brain, colon, kidney, liver, stomach, testis) are calculated.

## Sheet: Supplementary Table 8
Supplementary Table 8. DNAm correlations at CpG sites between whole blood and four brain tissues.
probe	gene	Blood PFC Correlation			Blood EC Correlation			Blood STG Correlation			Blood CER Correlation
		r*	p value	n	r	p value	n	r	p value	n	r	p value	n
cg01101459	LINC01132	-0.085	0.471	74	0.0293	0.808	71	-0.0533	0.65	75	0.101	0.403	71
cg22572071	ADGRF1	0.245	0.0352	74	0.00434	0.971	71	0.153	0.189	75	0.201	0.0926	71
cg15280358	ADAM12	-0.00298	0.98	74	0.0183	0.879	71	0.136	0.245	75	0.205	0.0863	71
cg00813162	ACTN1	0.0374	0.752	74	0.163	0.174	71	0.0673	0.566	75	0.111	0.357	71
cg14237301	APOBR	0.22	0.0591	74	0.0717	0.552	71	0.0165	0.888	75	0.052	0.667	71
*pearson correlation
PFC: prefrontal cortex
EC: entorhinal cortex
STG: superior temporal gyrus
CER: cerebellum

## Sheet: Supplementary Table 9
Supplementary Table 9. Top traits associated with CpGs (top 20) significantly associated with lifetime cannabis use.
CpGs	trait	p	OR	DMC	background
Top 20 CpGs significantly associated with lifetime cannabis use in EWAS with Model 2	Crohn's disease (CD)	2.28296e-13	38.224	3	2672
	maternal pre-pregnancy body mass index (BMI)	2.35917e-08	159.346	1	110
	soluble tumor necrosis factor receptor 2 (sTNFR2) levels in plasma	8.27172e-08	116.606	1	168
	maternal hypertensive disorders in pregnancy	3.40927e-07	41.193	1	922
	alcohol consumption	4.69343e-06	24.039	2	1816
	preeclampsia	9.95198e-06	20.531	2	2306
	psoriasis	1.36808e-05	13.628	1	4138
	body mass index (BMI)	9.14365e-05	19.414	2	1797
	multiple sclerosis	0.000158185	8.744	3	8093
	folic acid supplement during pregnancy	0.00236845	30.08	1	470
	Claes-Jensen syndrome	0.0087858	15.24	1	1050
Top 20 CpGs significantly associated with lifetime cannabis use from EWAS in never smokers	lung carcinoma	4.89527e-12	1397.01	1	56
	Crohn's disease (CD)	8.82592e-12	63.014	3	2672
	schizophrenia	4.99559e-09	56.565	2	2202
	smoking	5.58114e-08	14.253	5	20798
	perinatal polychlorinated biphenyls and polychlorinated dibenzofurans exposure	6.24976e-07	1907.03	1	20
	alcohol consumption	2.21537e-06	52.272	2	1816
	educational attainment	9.70105e-06	491.128	1	72
	poverty status	1.18474e-05	451.067	1	80
	papillary thyroid carcinoma	1.68596e-05	19	2	6073
	lung function	1.98309e-05	345.791	1	105
	HIV frailty	8.73702e-05	163.223	1	229
	Helicobacter pylori infection	0.000191672	30.735	1	2021
	atherosclerosis	0.000285709	26.803	1	2202
	B Acute Lymphoblastic Leukemia with t(1;19)(q23;p13.3); E2A-PBX1 (TCF3-PBX1)	0.000447375	7.439	3	21099
	multiple sclerosis	0.00066523	11.748	2	8093
	smoking cessation	0.00115524	44.144	1	948
	allergic sensitization	0.00258254	29.268	1	1501
	body mass index (BMI)	0.00350738	25.005	1	1797
OR: Odds Ratio
DMC: Number of probe cites that are differentially methylated in this trait.
Background: Number of probes of the trait in EWAS Atlas.
EWAS Toolkit - Documentation (cncb.ac.cn)

## Sheet: Supplementary Table 10
Supplementary Table 10. Overlap between meQTLs for CpGs signifciantly associated with lifetime cannabis use and GWAS results for lifetime cannabis use.
GWAS for lifetime cannabis use											meQTLs for top CpGs
SNP	Allele1	Allele2	MAF	Effect	StdErr	P	Direction	Chr	Bp	N	cpg	beta_a1	se	samplesize	pval	cistrans	direction
rs11644151	a	g	0.241	0.028	0.011	0.0082	++	16	28895660	162082	cg14237301	0.119	0.011	24149	2.94e-28	1	+++++++++++++++++++++?++?+??++?-++-+
rs7193274	c	g	0.759	-0.029	0.011	0.007	--	16	28872788	162082	cg14237301	0.122	0.011	24651	4.03e-30	1	---------------------?----??--?+--+-
rs7201929	t	c	0.759	-0.029	0.011	0.0068	--	16	28871966	162082	cg14237301	0.121	0.011	24652	8.13e-30	1	---------------------?----??--?+--+-
rs7499878	t	c	0.245	0.028	0.011	0.0095	++	16	28868464	162082	cg14237301	0.116	0.011	22682	1.32e-25	1	++++++++++++++?+++++??++++??++?-++-+
rs9933198	t	c	0.241	0.028	0.011	0.0093	++	16	28888409	162082	cg14237301	0.12	0.011	24648	3.55e-29	1	+++++++++++++++++++++?++++??++?-++-+
rs10220368	a	g	0.032	-0.082	0.027	0.0026	--	14	69717568	162082	cg00813162	-0.491	0.026	25200	9.61e-78	1	------?-----------------?--??-----+-
rs112907010	t	c	0.02	-0.11	0.037	0.0027	?-	14	69697648	126785	cg00813162	-0.557	0.036	20962	5.56e-54	1	?-----??----------+-----?-???----?--
rs11848820	a	t	0.613	-0.026	0.009	0.0058	+-	14	69658733	162082	cg00813162	0.069	0.009	27210	3.86e-15	1	---+----+---------------?---+-----+-
rs17106813	a	c	0.968	0.083	0.027	0.0026	++	14	69714294	162082	cg00813162	-0.494	0.026	25731	5.25e-82	1	++++++?+++++++++++++++++?++?++++++-+
rs242100	a	g	0.586	-0.025	0.009	0.0083	--	14	69470433	162082	cg00813162	0.089	0.009	27256	1.22e-24	1	------------------------?---+--+--+-
rs4243633	a	c	0.615	-0.025	0.009	0.007	+-	14	69701863	162082	cg00813162	0.072	0.009	27243	2.14e-16	1	---+----+---------------?---+-----+-
rs446091	a	g	0.416	0.025	0.009	0.0081	++	14	69473004	162082	cg00813162	0.085	0.009	26458	7.64e-22	1	+++++++?+++++++-++++++++?+++-++-++-+
rs8007859	t	g	0.616	-0.027	0.009	0.0043	+-	14	69704553	162082	cg00813162	0.072	0.009	27257	4.25e-16	1	---+----+---------------?---+-----+-
cpg=450k cpg
snp={CHR}:{POS}:{SNP/INDEL} (positions are on build 37, A,C,T,G alleles are coded as SNPs)
beta_a1: Regression coefficient of allele 1 from fixed effects meta analysis
se: Standard error fixed effects meta analysis
pval: Pvalue fixed effects meta analysis
samplesize: Samplesize used in fixed effects meta analysis
allele1: Effect allele
allele2: Non effect allele
cistrans: cis=TRUE, Cis: Distance between SNP-CpG <1 MB
direction: Direction for each of 36 cohorts

[truncated: 1 more sheets: Supplementary Table 11]
